# Supplementary material for: Cytotoxic cytochalasans from cultures of the fungus Metarhizium brunneum TBRC-BCC 79240
Source: Royal Society of Chemistry journal article supplement (doi:10.1039/d3ra00042g), 2023-01-01
Supplement: d3ra00042g1.pdf [file d3ra00042g1.pdf]

**Supporting Information Available**

**Cytotoxic Cytochalasans from Cultures of the Fungus**

***Metarhizium brunneum* TBRC-BCC 79240**

Jittra Kornsakulkarn, Patchanee Auncharoen, Artit Khonsanit, Nattawut Boonyuen, and  
Chawanee Thongpanchang\*

National Center for Genetic Engineering and Biotechnology (BIOTEC), National Science  
and Technology Development Agency (NSTDA), 111 Thailand Science Park, Phahonyothin  
Road, Khlong Nueng, Khlong Luang, Pathum Thani 12120 Thailand

\* Corresponding author. Tel: +66 2 5646700 ext. 3559. Fax: +66 2 5646707. E-mail:  
chawanee@biotec.or.th

## Table of contents

|                                                                                              |    |
|----------------------------------------------------------------------------------------------|----|
| <b>Figure S1.</b> $^1\text{H}$ NMR spectrum of compound <b>1</b> in Acetone- $d_6$ .....     | 1  |
| <b>Figure S3.</b> COSY spectrum of compound <b>1</b> in Acetone- $d_6$ .....                 | 2  |
| <b>Figure S4.</b> HSQC spectrum of compound <b>1</b> in Acetone- $d_6$ .....                 | 2  |
| <b>Figure S5.</b> HMBC spectrum of compound <b>1</b> in Acetone- $d_6$ .....                 | 3  |
| <b>Figure S6.</b> NOESY spectrum of compound <b>1</b> in Acetone- $d_6$ .....                | 3  |
| <b>Figure S7.</b> $^1\text{H}$ NMR spectrum of compound <b>2</b> in Acetone- $d_6$ .....     | 4  |
| <b>Figure S8.</b> $^{13}\text{C}$ NMR spectrum of compound <b>2</b> in Acetone- $d_6$ .....  | 4  |
| <b>Figure S9.</b> COSY spectrum of compound <b>2</b> in Acetone- $d_6$ .....                 | 5  |
| <b>Figure S10.</b> HSQC spectrum of compound <b>2</b> in Acetone- $d_6$ .....                | 5  |
| <b>Figure S11.</b> HMBC spectrum of compound <b>2</b> in Acetone- $d_6$ .....                | 6  |
| <b>Figure S12.</b> NOESY spectrum of compound <b>2</b> in Acetone- $d_6$ .....               | 6  |
| <b>Figure S13.</b> $^1\text{H}$ NMR spectrum of compound <b>3</b> in Acetone- $d_6$ .....    | 7  |
| <b>Figure S14.</b> $^{13}\text{C}$ NMR spectrum of compound <b>3</b> in Acetone- $d_6$ ..... | 7  |
| <b>Figure S15.</b> COSY spectrum of compound <b>3</b> in Acetone- $d_6$ .....                | 8  |
| <b>Figure S17.</b> HSQC spectrum of compound <b>3</b> in Acetone- $d_6$ .....                | 8  |
| <b>Figure S17.</b> HMBC spectrum of compound <b>3</b> in Acetone- $d_6$ .....                | 9  |
| <b>Figure S18.</b> NOESY spectrum of compound <b>3</b> in Acetone- $d_6$ .....               | 9  |
| <b>Figure S19.</b> $^1\text{H}$ NMR spectrum of compound <b>4</b> in Acetone- $d_6$ .....    | 10 |
| <b>Figure S20.</b> $^{13}\text{C}$ NMR spectrum of compound <b>4</b> in Acetone- $d_6$ ..... | 10 |
| <b>Figure S21.</b> COSY spectrum of compound <b>4</b> in Acetone- $d_6$ .....                | 11 |
| <b>Figure S22.</b> HSQC spectrum of compound <b>4</b> in Acetone- $d_6$ .....                | 11 |
| <b>Figure S23.</b> HMBC spectrum of compound <b>4</b> in Acetone- $d_6$ .....                | 12 |
| <b>Figure S24.</b> NOESY spectrum of compound <b>4</b> in Acetone- $d_6$ .....               | 12 |
| <b>Figure S25.</b> $^1\text{H}$ NMR spectrum of compound <b>5</b> in DMSO- $d_6$ .....       | 13 |
| <b>Figure S26.</b> $^{13}\text{C}$ NMR spectrum of compound <b>5</b> in DMSO- $d_6$ .....    | 13 |
| <b>Figure S27.</b> COSY spectrum of compound <b>5</b> in DMSO- $d_6$ .....                   | 14 |
| <b>Figure S28.</b> HSQC spectrum of compound <b>5</b> in DMSO- $d_6$ .....                   | 14 |
| <b>Figure S29.</b> HMBC spectrum of compound <b>5</b> in DMSO- $d_6$ .....                   | 15 |
| <b>Figure S30.</b> NOESY spectrum of compound <b>5</b> in DMSO- $d_6$ .....                  | 15 |
| <b>Figure S31.</b> $^1\text{H}$ NMR spectrum of compound <b>6</b> in DMSO- $d_6$ .....       | 16 |
| <b>Figure S32.</b> $^{13}\text{C}$ NMR spectrum of compound <b>6</b> in DMSO- $d_6$ .....    | 16 |

|                                                                                                               |    |
|---------------------------------------------------------------------------------------------------------------|----|
| <b>Figure S33.</b> COSY spectrum of compound <b>6</b> in DMSO- <i>d</i> <sub>6</sub> .....                    | 17 |
| <b>Figure S34.</b> HSQC spectrum of compound <b>6</b> in DMSO- <i>d</i> <sub>6</sub> .....                    | 17 |
| <b>Figure S35.</b> HMBC spectrum of compound <b>6</b> in DMSO- <i>d</i> <sub>6</sub> .....                    | 18 |
| <b>Figure S36.</b> NOESY spectrum of compound <b>6</b> in DMSO- <i>d</i> <sub>6</sub> .....                   | 18 |
| <b>Figure S37.</b> <sup>1</sup> H NMR spectrum of compound <b>7</b> in Acetone- <i>d</i> <sub>6</sub> .....   | 19 |
| <b>Figure S38.</b> <sup>13</sup> C NMR spectrum of compound <b>7</b> in Acetone- <i>d</i> <sub>6</sub> .....  | 19 |
| <b>Figure S39.</b> COSY spectrum of compound <b>7</b> in Acetone- <i>d</i> <sub>6</sub> .....                 | 20 |
| <b>Figure S40.</b> HSQC spectrum of compound <b>7</b> in Acetone- <i>d</i> <sub>6</sub> .....                 | 20 |
| <b>Figure S41.</b> HMBC spectrum of compound <b>7</b> in Acetone- <i>d</i> <sub>6</sub> .....                 | 21 |
| <b>Figure S42.</b> NOESY spectrum of compound <b>7</b> in Acetone- <i>d</i> <sub>6</sub> .....                | 21 |
| <b>Figure S43.</b> <sup>1</sup> H NMR spectrum of compound <b>8</b> in Acetone- <i>d</i> <sub>6</sub> .....   | 22 |
| <b>Figure S44.</b> <sup>13</sup> C NMR spectrum of compound <b>8</b> in Acetone- <i>d</i> <sub>6</sub> .....  | 22 |
| <b>Figure S45.</b> COSY spectrum of compound <b>8</b> in Acetone- <i>d</i> <sub>6</sub> .....                 | 23 |
| <b>Figure S46.</b> HSQC spectrum of compound <b>8</b> in Acetone- <i>d</i> <sub>6</sub> .....                 | 23 |
| <b>Figure S47.</b> HMBC spectrum of compound <b>8</b> in Acetone- <i>d</i> <sub>6</sub> .....                 | 24 |
| <b>Figure S48.</b> NOESY spectrum of compound <b>8</b> in Acetone- <i>d</i> <sub>6</sub> .....                | 24 |
| <b>Figure S49.</b> <sup>1</sup> H NMR spectrum of compound <b>9</b> in Acetone- <i>d</i> <sub>6</sub> .....   | 25 |
| <b>Figure S50.</b> <sup>13</sup> C NMR spectrum of compound <b>9</b> in Acetone- <i>d</i> <sub>6</sub> .....  | 25 |
| <b>Figure S51.</b> COSY spectrum of compound <b>9</b> in Acetone- <i>d</i> <sub>6</sub> .....                 | 26 |
| <b>Figure S52.</b> HSQC spectrum of compound <b>9</b> in Acetone- <i>d</i> <sub>6</sub> .....                 | 26 |
| <b>Figure S53.</b> HMBC spectrum of compound <b>9</b> in Acetone- <i>d</i> <sub>6</sub> .....                 | 27 |
| <b>Figure S54.</b> NOESY spectrum of compound <b>9</b> in Acetone- <i>d</i> <sub>6</sub> .....                | 27 |
| <b>Figure S55.</b> <sup>1</sup> H NMR spectrum of compound <b>10</b> in Acetone- <i>d</i> <sub>6</sub> .....  | 28 |
| <b>Figure S56.</b> <sup>13</sup> C NMR spectrum of compound <b>10</b> in Acetone- <i>d</i> <sub>6</sub> ..... | 28 |
| <b>Figure S57.</b> COSY spectrum of compound <b>10</b> in Acetone- <i>d</i> <sub>6</sub> .....                | 29 |
| <b>Figure S58.</b> HSQC spectrum of compound <b>10</b> in Acetone- <i>d</i> <sub>6</sub> .....                | 29 |
| <b>Figure S59.</b> HMBC spectrum of compound <b>10</b> in Acetone- <i>d</i> <sub>6</sub> .....                | 30 |
| <b>Figure S60.</b> NOESY spectrum of compound <b>10</b> in Acetone- <i>d</i> <sub>6</sub> .....               | 30 |
| <b>Figure S61.</b> <sup>1</sup> H NMR spectrum of compound <b>11</b> in Acetone- <i>d</i> <sub>6</sub> .....  | 31 |
| <b>Figure S62.</b> <sup>13</sup> C NMR spectrum of compound <b>11</b> in Acetone- <i>d</i> <sub>6</sub> ..... | 31 |
| <b>Figure S63.</b> COSY spectrum of compound <b>11</b> in Acetone- <i>d</i> <sub>6</sub> .....                | 32 |
| <b>Figure S64.</b> HSQC spectrum of compound <b>11</b> in Acetone- <i>d</i> <sub>6</sub> .....                | 32 |
| <b>Figure S65.</b> HMBC spectrum of compound <b>11</b> in Acetone- <i>d</i> <sub>6</sub> .....                | 33 |

|                                                                                                               |    |
|---------------------------------------------------------------------------------------------------------------|----|
| <b>Figure S66.</b> NOESY spectrum of compound <b>11</b> in Acetone- <i>d</i> <sub>6</sub> .....               | 33 |
| <b>Figure S67.</b> <sup>1</sup> H NMR spectrum of compound <b>12</b> in Acetone- <i>d</i> <sub>6</sub> .....  | 34 |
| <b>Figure S68.</b> <sup>13</sup> C NMR spectrum of compound <b>12</b> in Acetone- <i>d</i> <sub>6</sub> ..... | 34 |
| <b>Figure S69.</b> COSY spectrum of compound <b>12</b> in Acetone- <i>d</i> <sub>6</sub> .....                | 35 |
| <b>Figure S70.</b> HSQC spectrum of compound <b>12</b> in Acetone- <i>d</i> <sub>6</sub> .....                | 35 |
| <b>Figure S71.</b> HMBC spectrum of compound <b>12</b> in Acetone- <i>d</i> <sub>6</sub> .....                | 36 |
| <b>Figure S72.</b> NOESY spectrum of compound <b>12</b> in Acetone- <i>d</i> <sub>6</sub> .....               | 36 |
| <b>Figure S73.</b> <sup>1</sup> H NMR spectrum of compound <b>13</b> in Acetone- <i>d</i> <sub>6</sub> .....  | 37 |
| <b>Figure S74.</b> <sup>13</sup> C NMR spectrum of compound <b>13</b> in Acetone- <i>d</i> <sub>6</sub> ..... | 37 |
| <b>Figure S75.</b> COSY spectrum of compound <b>13</b> in Acetone- <i>d</i> <sub>6</sub> .....                | 38 |
| <b>Figure S76.</b> HSQC spectrum of compound <b>13</b> in Acetone- <i>d</i> <sub>6</sub> .....                | 38 |
| <b>Figure S77.</b> HMBC spectrum of compound <b>13</b> in Acetone- <i>d</i> <sub>6</sub> .....                | 39 |
| <b>Figure S78.</b> NOESY spectrum of compound <b>13</b> in Acetone- <i>d</i> <sub>6</sub> .....               | 39 |
| <b>Figure S79.</b> <sup>1</sup> H NMR spectrum of compound <b>14</b> in Acetone- <i>d</i> <sub>6</sub> .....  | 40 |
| <b>Figure S80.</b> <sup>13</sup> C NMR spectrum of compound <b>14</b> in Acetone- <i>d</i> <sub>6</sub> ..... | 40 |
| <b>Figure S81.</b> COSY spectrum of compound <b>14</b> in Acetone- <i>d</i> <sub>6</sub> .....                | 41 |
| <b>Figure S82.</b> HSQC spectrum of compound <b>14</b> in Acetone- <i>d</i> <sub>6</sub> .....                | 41 |
| <b>Figure S83.</b> HMBC spectrum of compound <b>14</b> in Acetone- <i>d</i> <sub>6</sub> .....                | 42 |
| <b>Figure S84.</b> NOESY spectrum of compound <b>14</b> in Acetone- <i>d</i> <sub>6</sub> .....               | 42 |
| <b>Figure S85.</b> <sup>1</sup> H NMR spectrum of compound <b>15</b> in DMSO- <i>d</i> <sub>6</sub> .....     | 43 |
| <b>Figure S86.</b> <sup>13</sup> C NMR spectrum of compound <b>15</b> in DMSO- <i>d</i> <sub>6</sub> .....    | 43 |
| <b>Figure S87.</b> <sup>1</sup> H NMR spectrum of compound <b>16</b> in Acetone- <i>d</i> <sub>6</sub> .....  | 44 |
| <b>Figure S88.</b> <sup>13</sup> C NMR spectrum of compound <b>16</b> in Acetone- <i>d</i> <sub>6</sub> ..... | 44 |
| <b>Figure S89.</b> <sup>1</sup> H NMR spectrum of compound <b>17</b> in DMSO- <i>d</i> <sub>6</sub> .....     | 45 |
| <b>Figure S90.</b> <sup>13</sup> C NMR spectrum of compound <b>17</b> in DMSO- <i>d</i> <sub>6</sub> .....    | 45 |
| <b>Figure S91.</b> <sup>1</sup> H NMR spectrum of compound <b>18</b> in Acetone- <i>d</i> <sub>6</sub> .....  | 46 |
| <b>Figure S92.</b> <sup>13</sup> C NMR spectrum of compound <b>18</b> in Acetone- <i>d</i> <sub>6</sub> ..... | 46 |
| <b>Figure S93.</b> <sup>1</sup> H NMR spectrum of destruxins A in CDCl <sub>3</sub> .....                     | 47 |
| <b>Figure S94.</b> <sup>13</sup> C NMR spectrum of destruxins A in CDCl <sub>3</sub> .....                    | 47 |
| <b>Figure S95.</b> <sup>1</sup> H NMR spectrum of destruxins B in CDCl <sub>3</sub> .....                     | 48 |
| <b>Figure S96.</b> <sup>13</sup> C NMR spectrum of destruxins B in CDCl <sub>3</sub> .....                    | 48 |
| <b>Figure S97.</b> <sup>1</sup> H NMR spectrum of helvolic acid in CDCl <sub>3</sub> .....                    | 49 |
| <b>Figure S98.</b> <sup>13</sup> C NMR spectrum of helvolic acid in CDCl <sub>3</sub> .....                   | 49 |

|                                                                                                      |    |
|------------------------------------------------------------------------------------------------------|----|
| <b>Figure S99.</b> $^1\text{H}$ NMR spectrum of 1,2-dihydrohevolcic acid in Acetone- $d_6$ .....     | 50 |
| <b>Figure S100.</b> $^{13}\text{C}$ NMR spectrum of 1,2-dihydrohevolcic acid in Acetone- $d_6$ ..... | 50 |
| <b>Figure S101.</b> $^1\text{H}$ NMR spectrum of meromuside I in MeOH- $d_4$ .....                   | 51 |
| <b>Figure S102.</b> $^{13}\text{C}$ NMR spectrum of meromuside I in MeOH- $d_4$ .....                | 51 |
| <b>Figure S103.</b> $^1\text{H}$ NMR spectrum of ustilaginoidins D in $\text{CDCl}_3$ .....          | 52 |
| <b>Figure S104.</b> $^{13}\text{C}$ NMR spectrum of ustilaginoidins D in $\text{CDCl}_3$ .....       | 52 |
| <b>Figure S105.</b> $^1\text{H}$ NMR spectrum of ustilaginoidins K in DMSO- $d_6$ .....              | 53 |
| <b>Figure S106.</b> $^{13}\text{C}$ NMR spectrum of ustilaginoidins K in DMSO- $d_6$ .....           | 53 |
| <b>Figure S107.</b> HRESIMS spectrum of compound <b>1</b> .....                                      | 54 |
| <b>Figure S108.</b> HRESIMS spectrum of compound <b>2</b> .....                                      | 54 |
| <b>Figure S109.</b> HRESIMS spectrum of compound <b>3</b> .....                                      | 55 |
| <b>Figure S110.</b> HRESIMS spectrum of compound <b>4</b> .....                                      | 55 |
| <b>Figure S111.</b> HRESIMS spectrum of compound <b>5</b> .....                                      | 56 |
| <b>Figure S112.</b> HRESIMS spectrum of compound <b>6</b> .....                                      | 56 |
| <b>Figure S113.</b> HRESIMS spectrum of compound <b>7</b> .....                                      | 57 |
| <b>Figure S114.</b> HRESIMS spectrum of compound <b>8</b> .....                                      | 57 |
| <b>Figure S115.</b> HRESIMS spectrum of compound <b>9</b> .....                                      | 58 |
| <b>Figure S116.</b> HRESIMS spectrum of compound <b>10</b> .....                                     | 58 |
| <b>Figure S117.</b> HRESIMS spectrum of compound <b>11</b> .....                                     | 59 |
| <b>Figure S118.</b> HRESIMS spectrum of compound <b>12</b> .....                                     | 59 |
| <b>Figure S119.</b> HRESIMS spectrum of compound <b>13</b> .....                                     | 60 |
| <b>Figure S120.</b> HRESIMS spectrum of compound <b>14</b> .....                                     | 60 |
| <b>Figure S121.</b> HRESIMS spectrum of compound <b>15</b> .....                                     | 61 |
| <b>Figure S122.</b> HRESIMS spectrum of compound <b>16</b> .....                                     | 61 |
| <b>Figure S123.</b> HRESIMS spectrum of compound <b>17</b> .....                                     | 62 |
| <b>Figure S124.</b> HRESIMS spectrum of compound <b>18</b> .....                                     | 62 |
| <b>Figure S125.</b> HRESIMS spectrum of destruxin A.....                                             | 63 |
| <b>Figure S126.</b> HRESIMS spectrum of destruxin B.....                                             | 63 |
| <b>Figure S127.</b> HRESIMS spectrum of helvolcic acid.....                                          | 64 |
| <b>Figure S128.</b> HRESIMS spectrum of 1,2-dihydrohelvolcic acid.....                               | 64 |
| <b>Figure S129.</b> HRESIMS spectrum of meromuside I.....                                            | 65 |
| <b>Figure S130.</b> HRESIMS spectrum of ustilaginoidins D.....                                       | 65 |
| <b>Figure S131.</b> HRESIMS spectrum of ustilaginoidins K.....                                       | 66 |

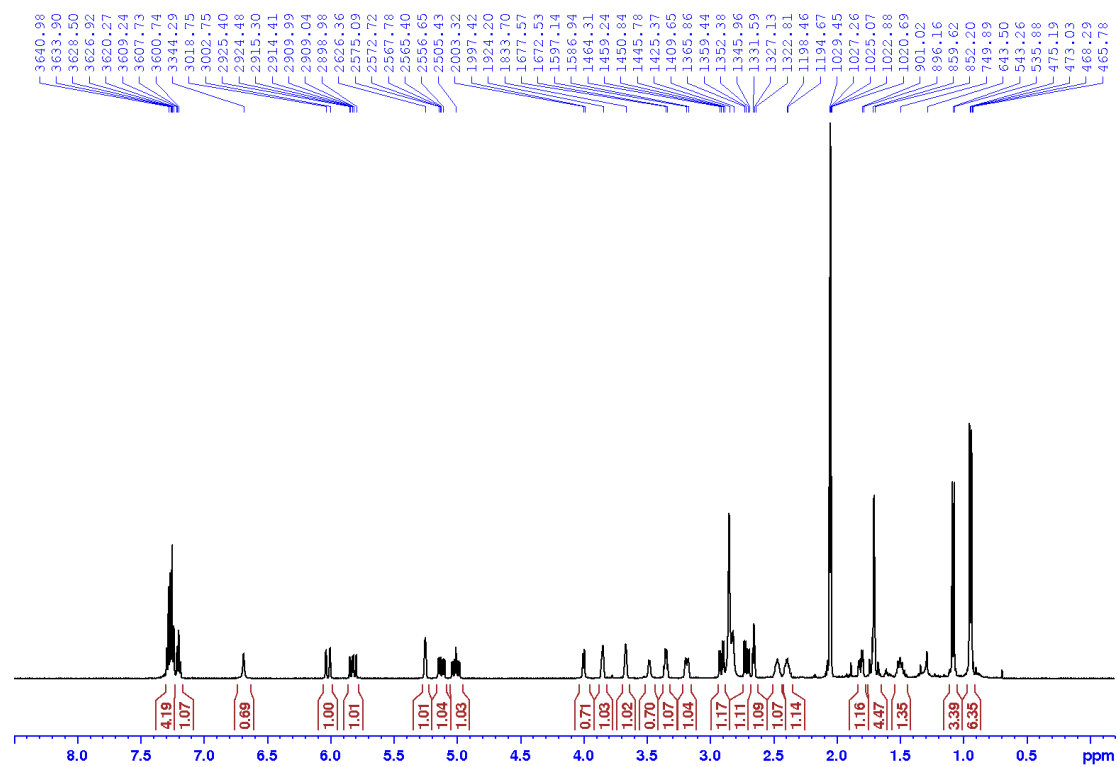

Figure S1.  $^1\text{H}$  NMR spectrum of compound **1** in Acetone- $d_6$

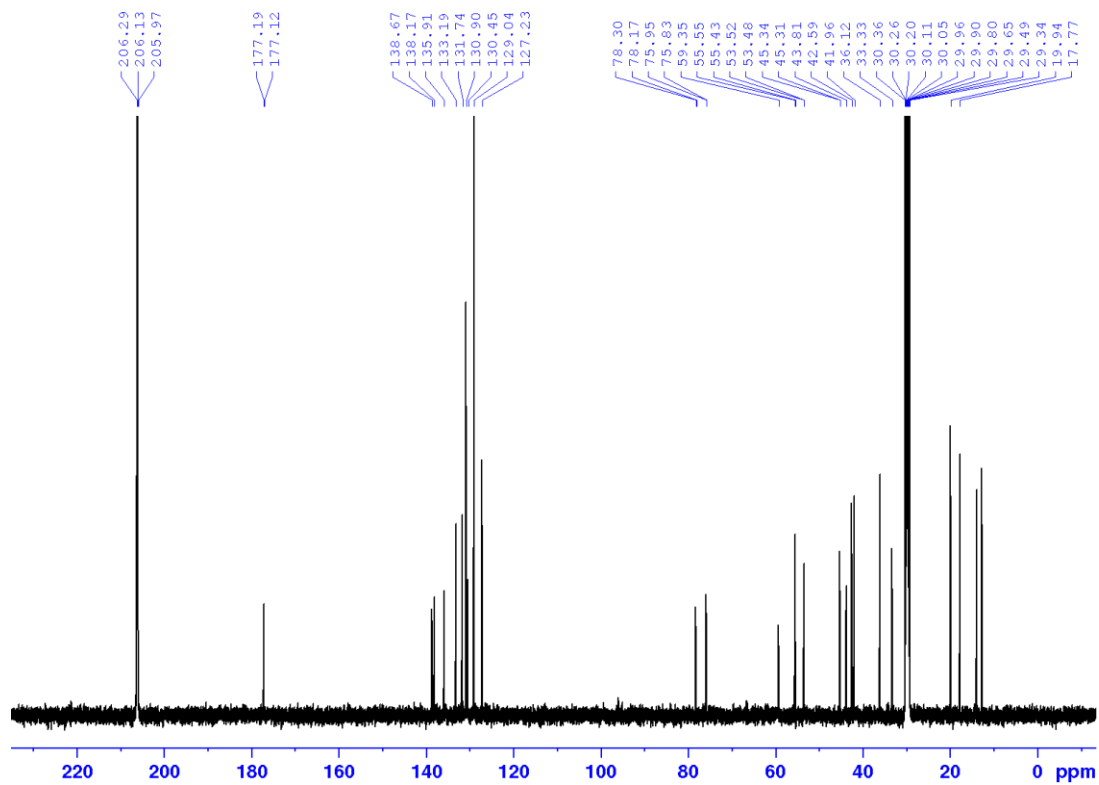

Figure S2.  $^{13}\text{C}$  NMR spectrum of compound **1** in Acetone- $d_6$

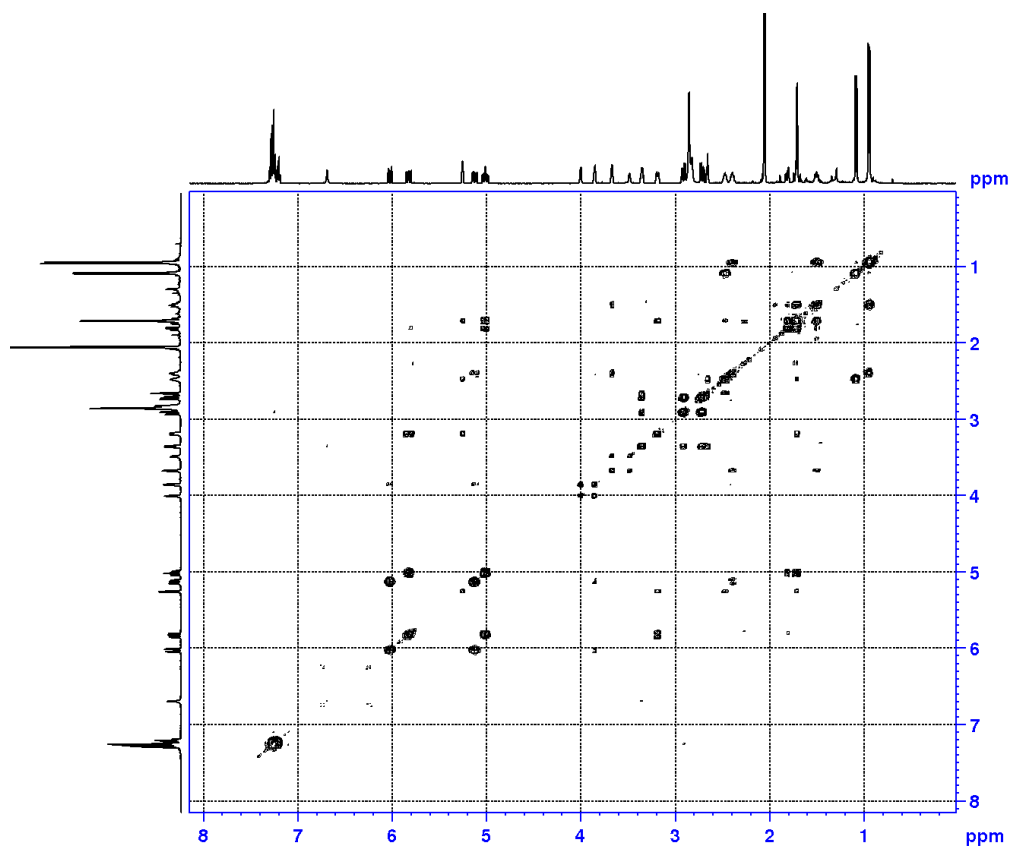

Figure S3. COSY spectrum of compound **1** in Acetone- $d_6$

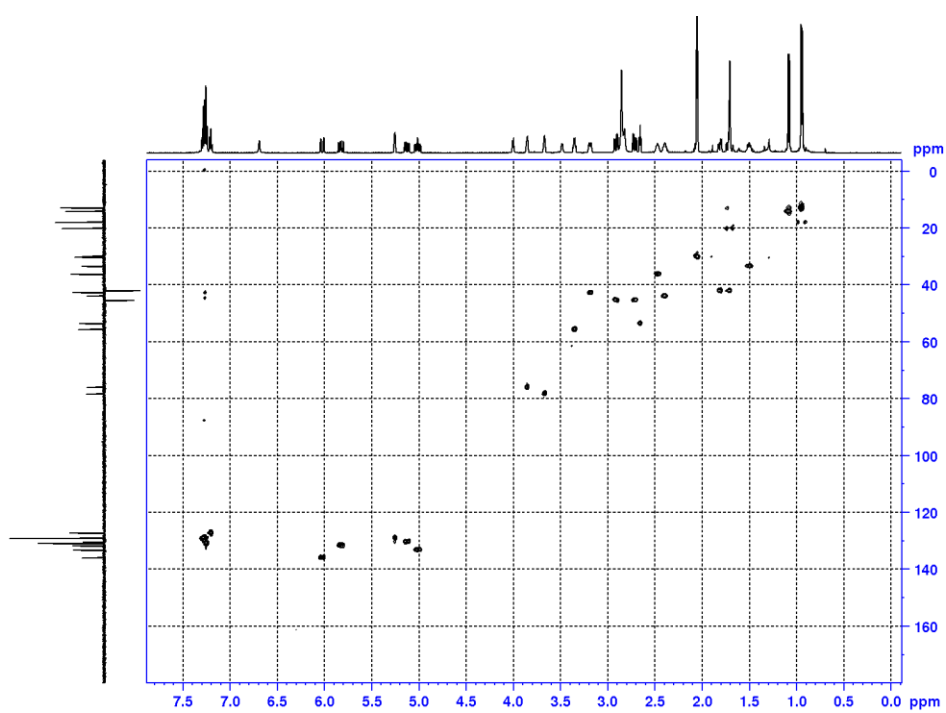

Figure S4. HSQC spectrum of compound **1** in Acetone- $d_6$

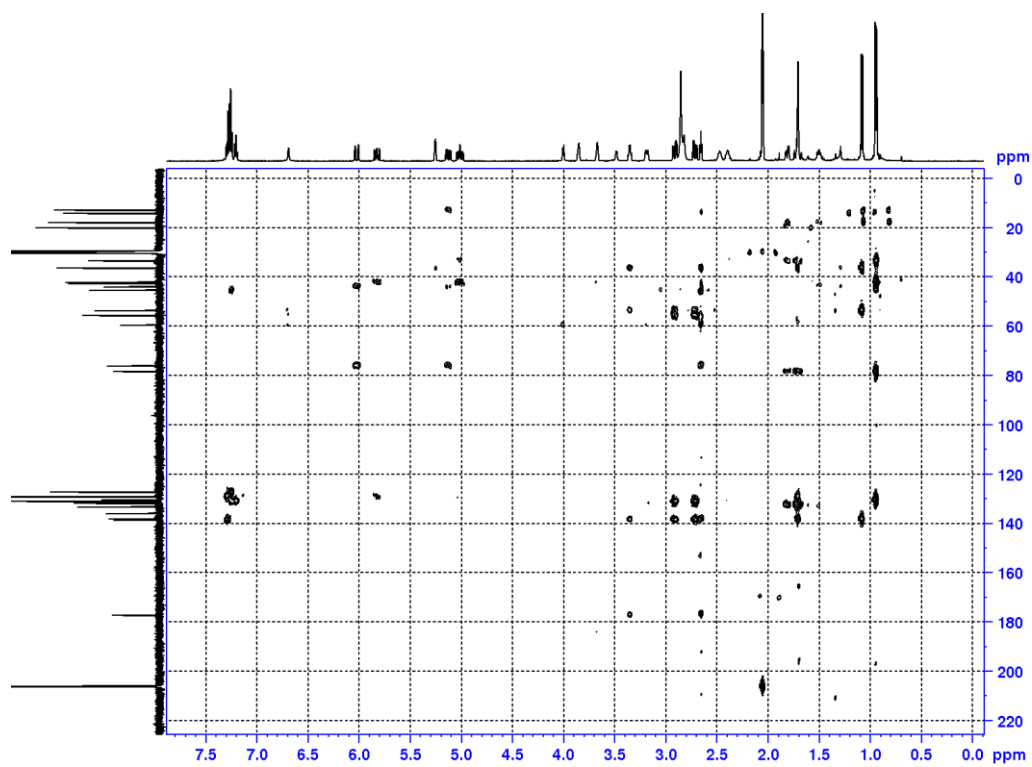

**Figure S5.** HMBC spectrum of compound **1** in Acetone- $d_6$

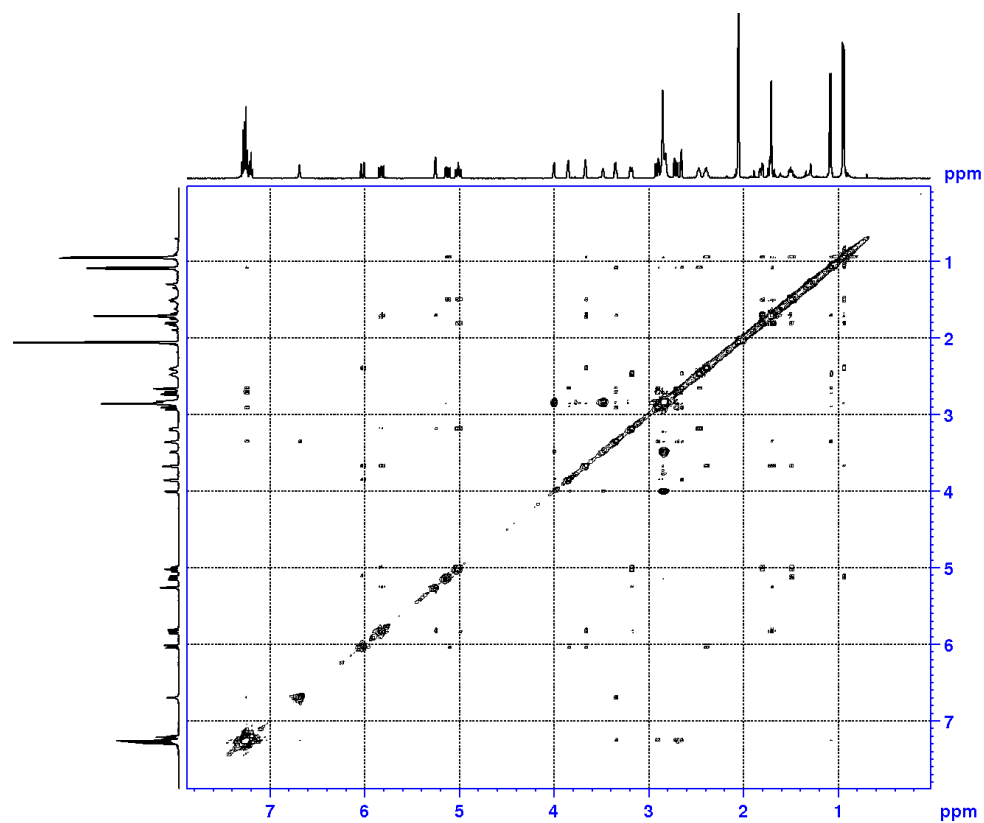

**Figure S6.** NOESY spectrum of compound **1** in Acetone- $d_6$



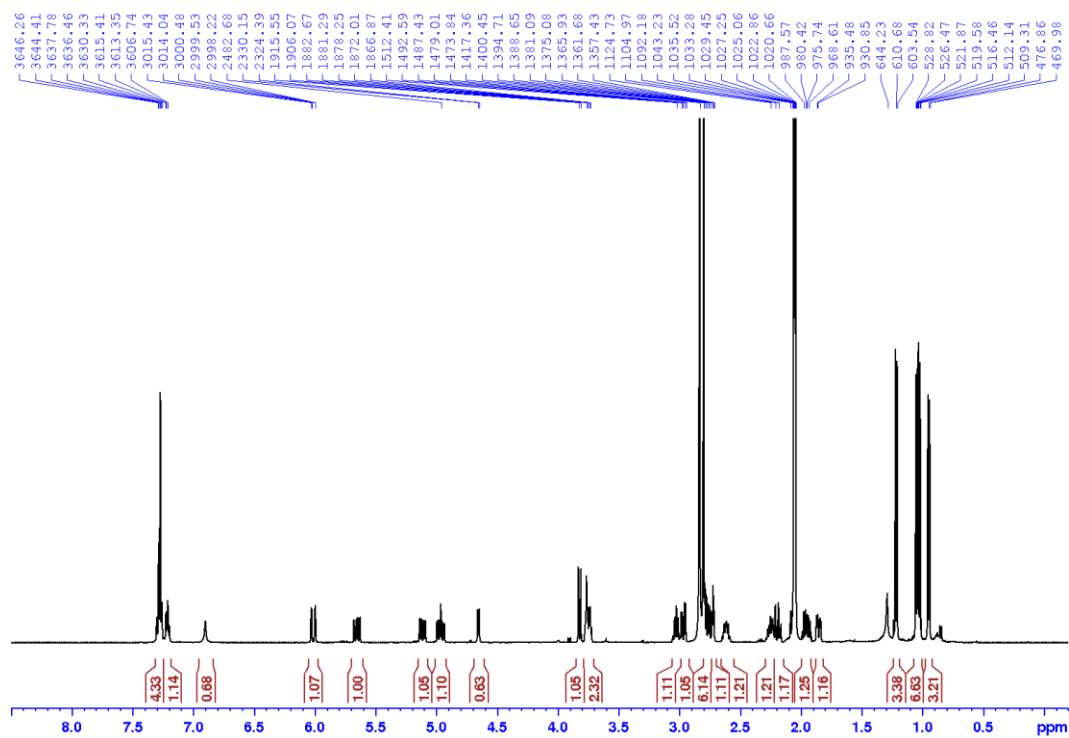

Figure S7.  $^1\text{H}$  NMR spectrum of compound **2** in Acetone- $d_6$

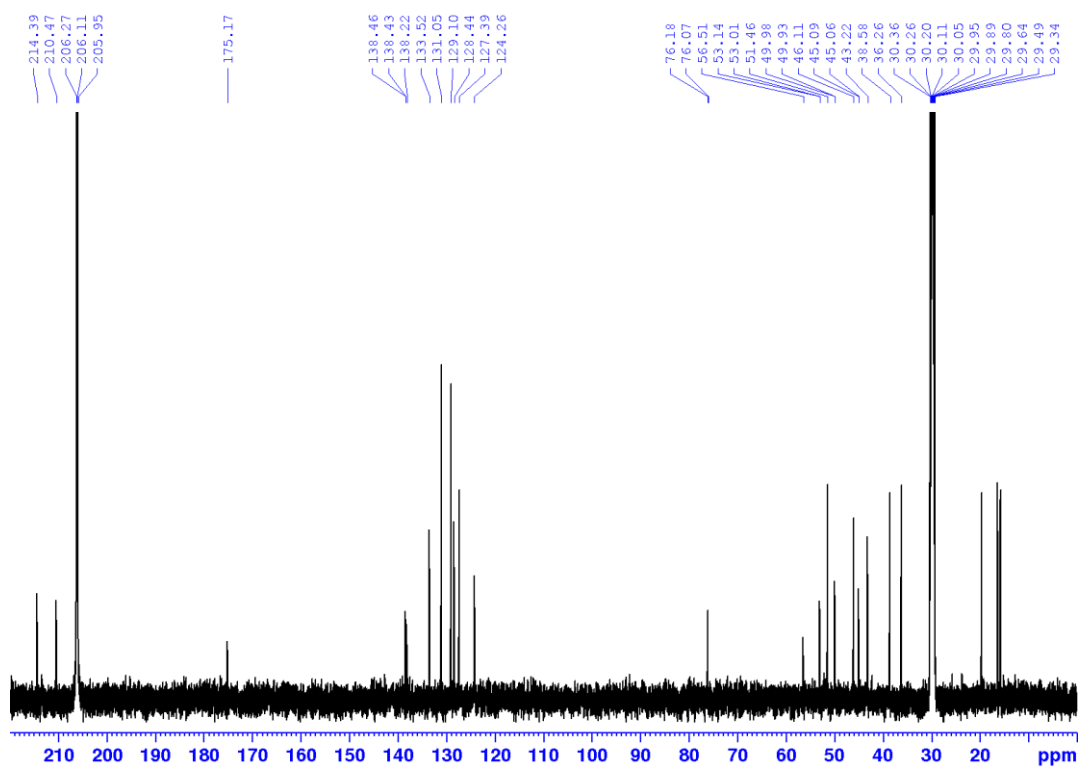

Figure S8.  $^{13}\text{C}$  NMR spectrum of compound **2** in Acetone- $d_6$

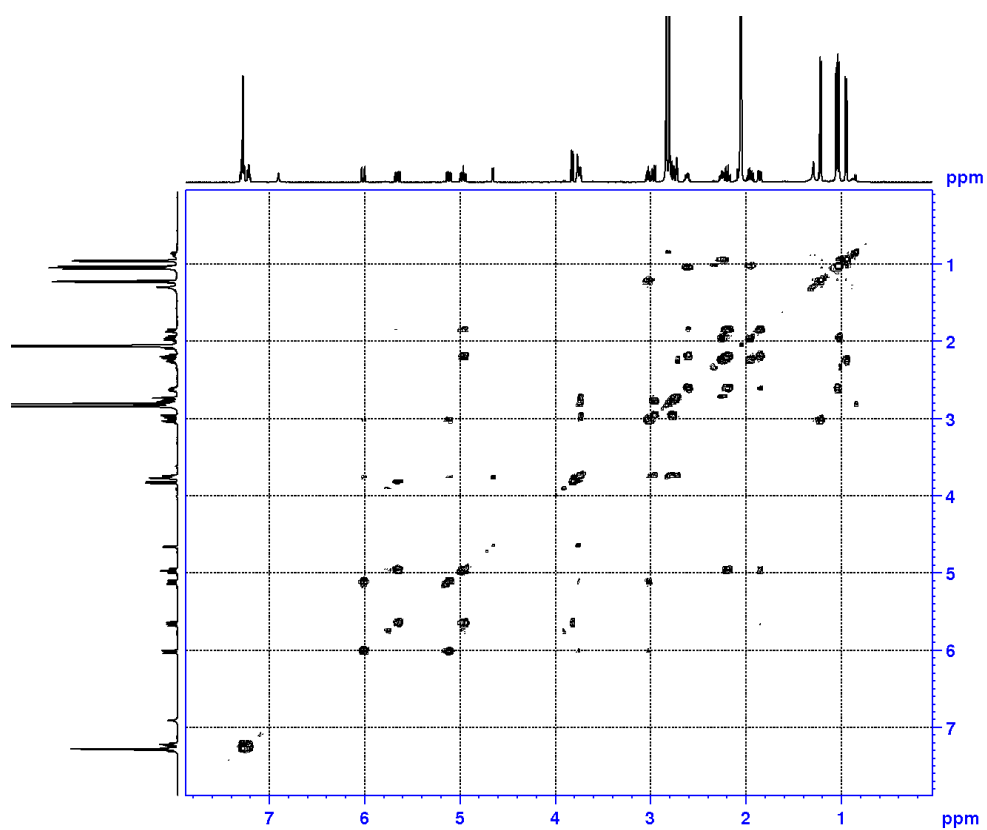

**Figure S9.** COSY spectrum of compound **2** in Acetone- $d_6$

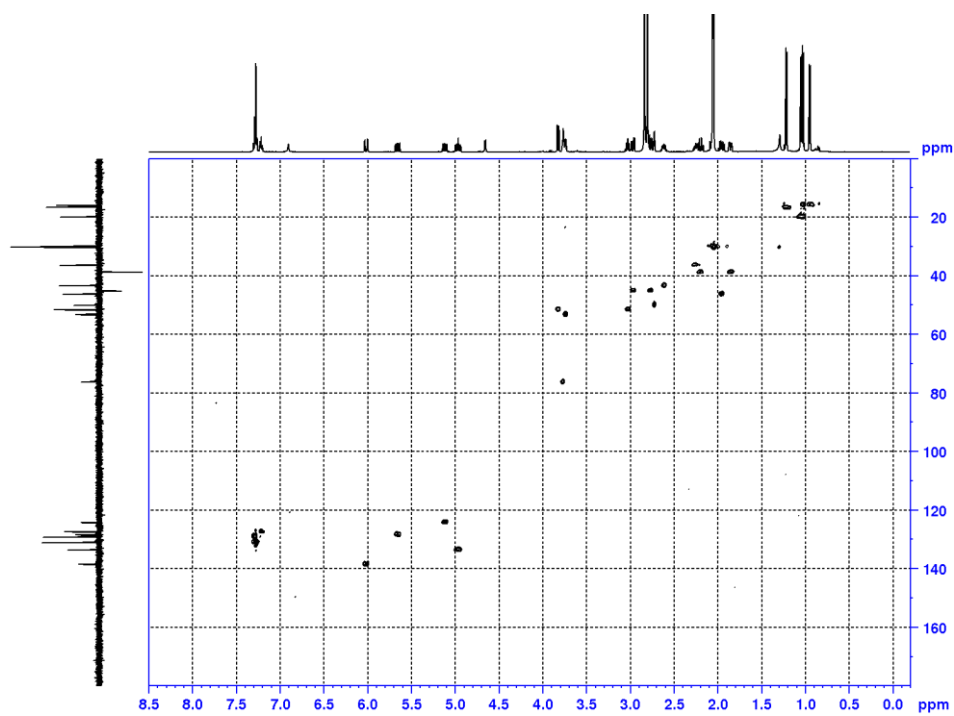

**Figure S10.** HSQC spectrum of compound **2** in Acetone- $d_6$

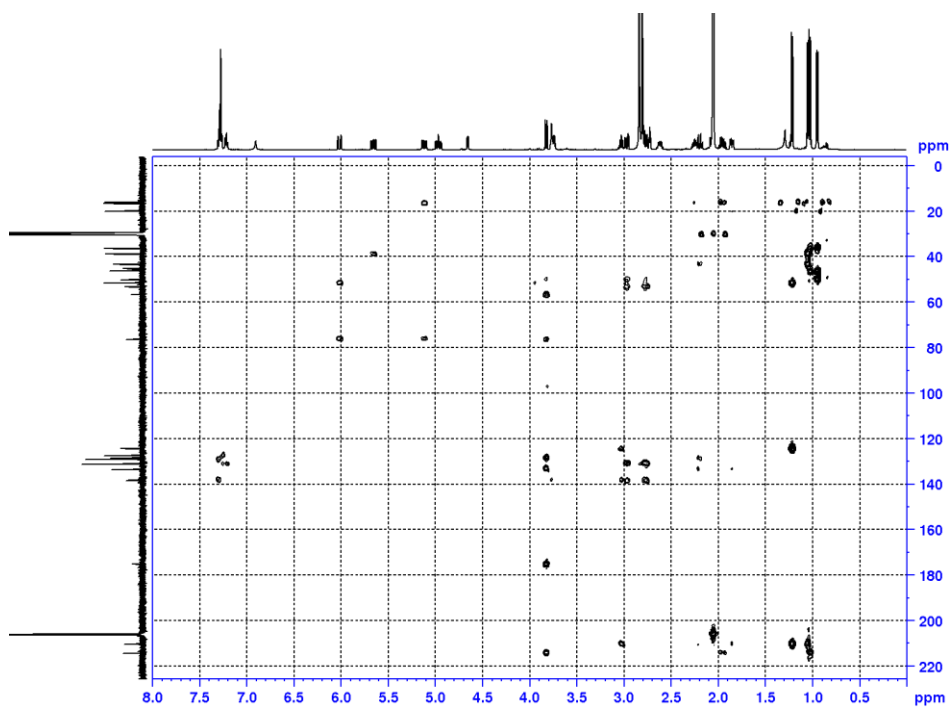

**Figure S11.** HMBC spectrum of compound **2** in Acetone-*d*<sub>6</sub>

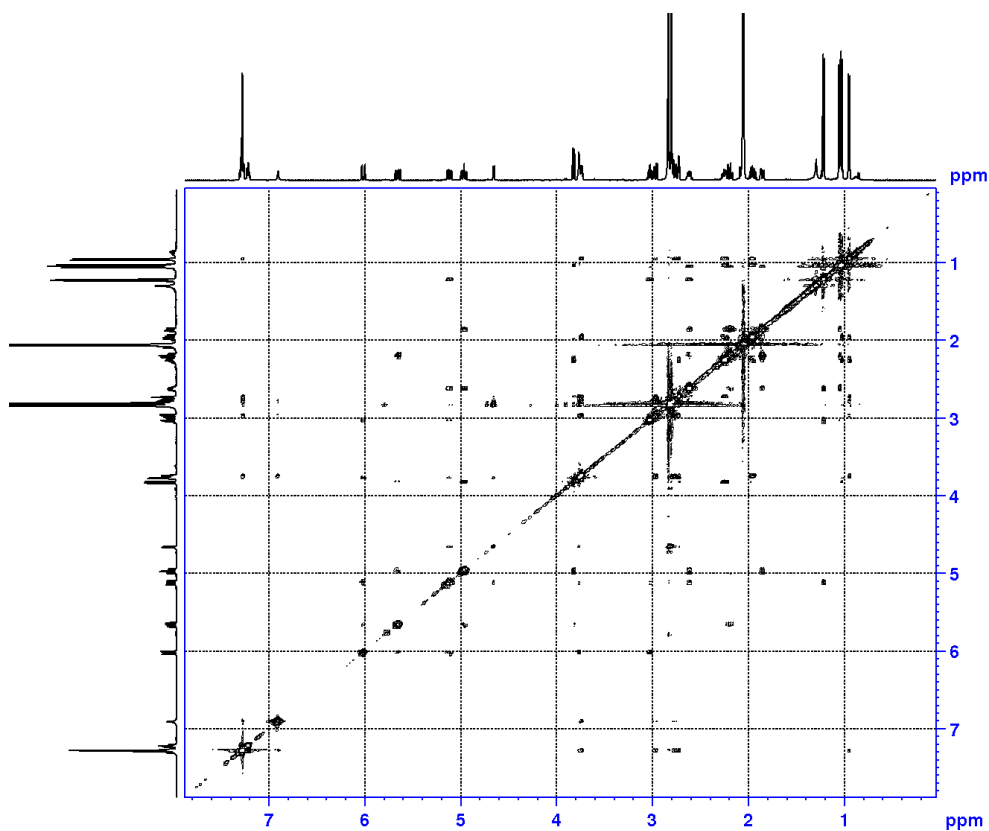

**Figure S12.** NOESY spectrum of compound **2** in Acetone-*d*<sub>6</sub>

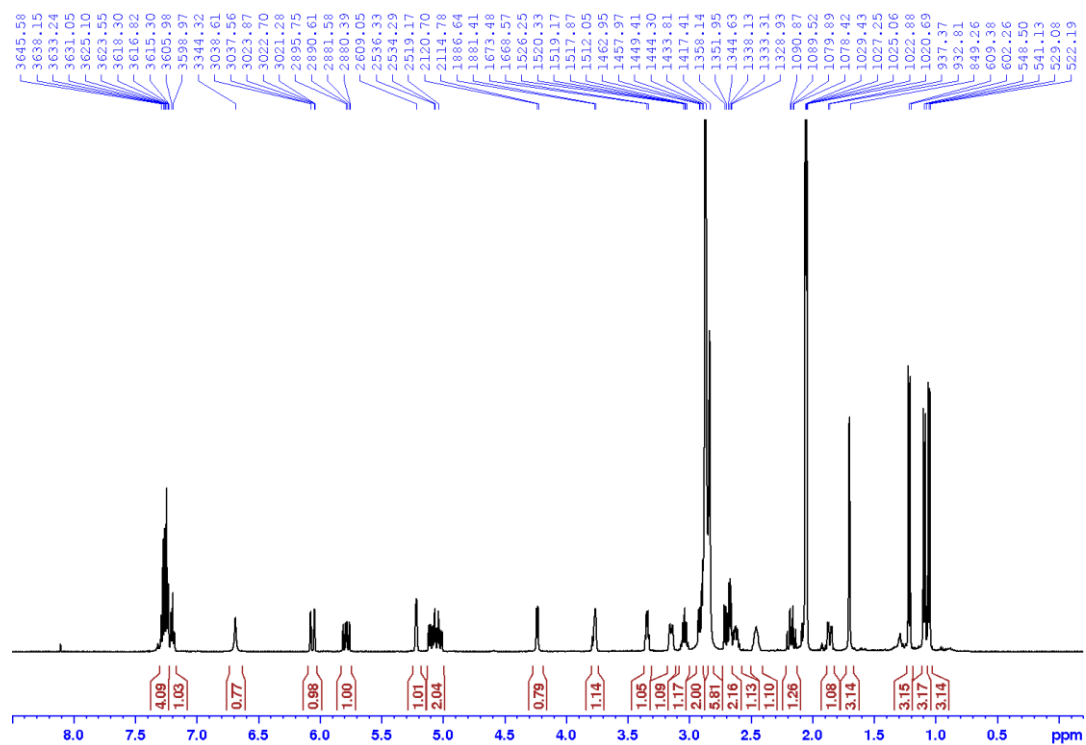

Figure S13.  $^1\text{H}$  NMR spectrum of compound **3** in Acetone- $d_6$

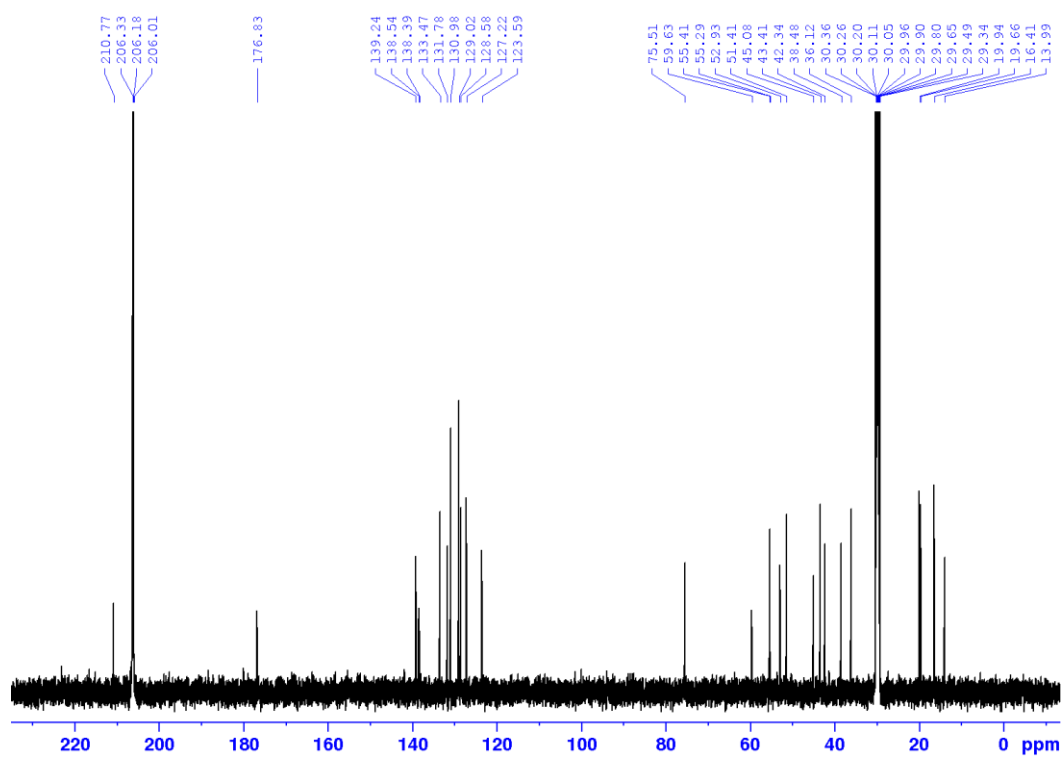

Figure S14.  $^{13}\text{C}$  NMR spectrum of compound **3** in Acetone- $d_6$

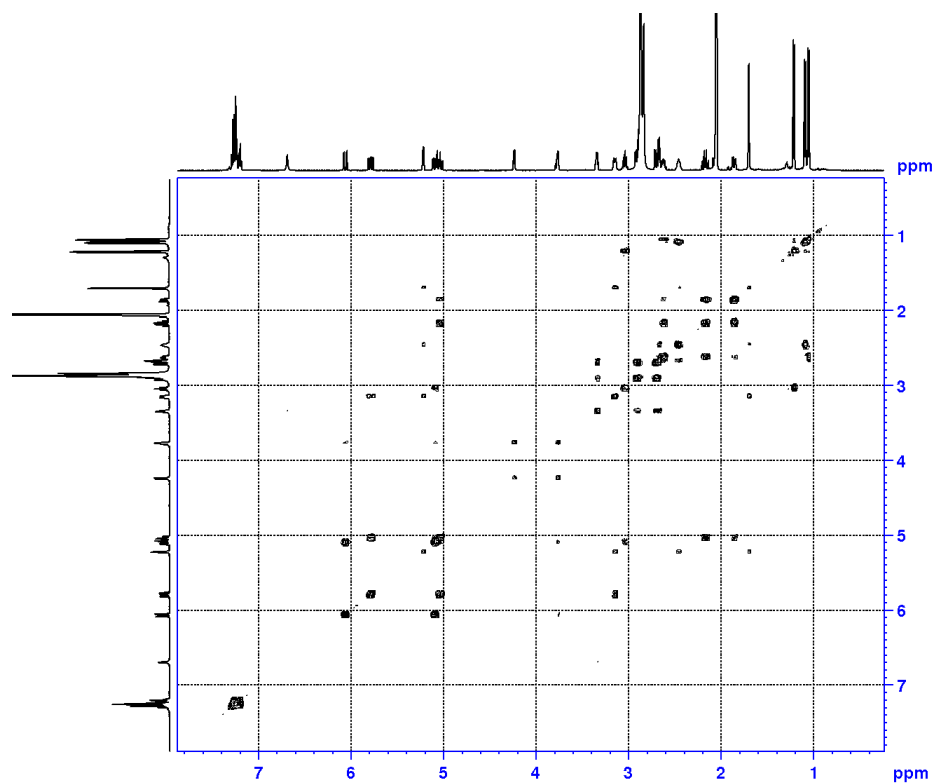

**Figure S15.** COSY spectrum of compound **3** in Acetone- $d_6$

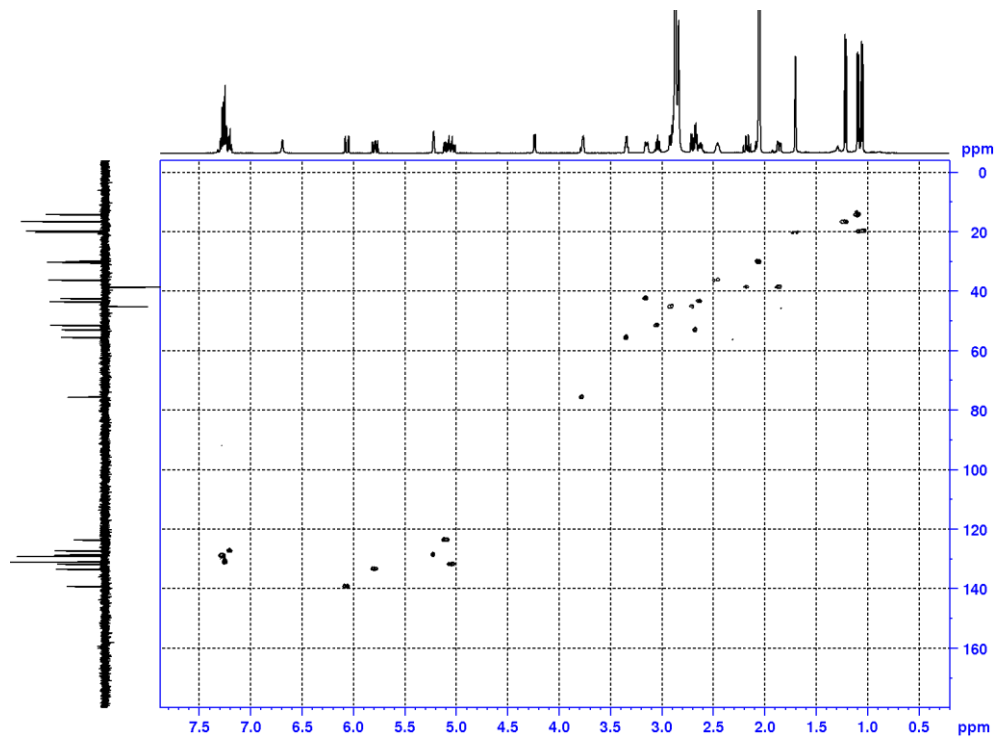

**Figure S17.** HSQC spectrum of compound **3** in Acetone- $d_6$

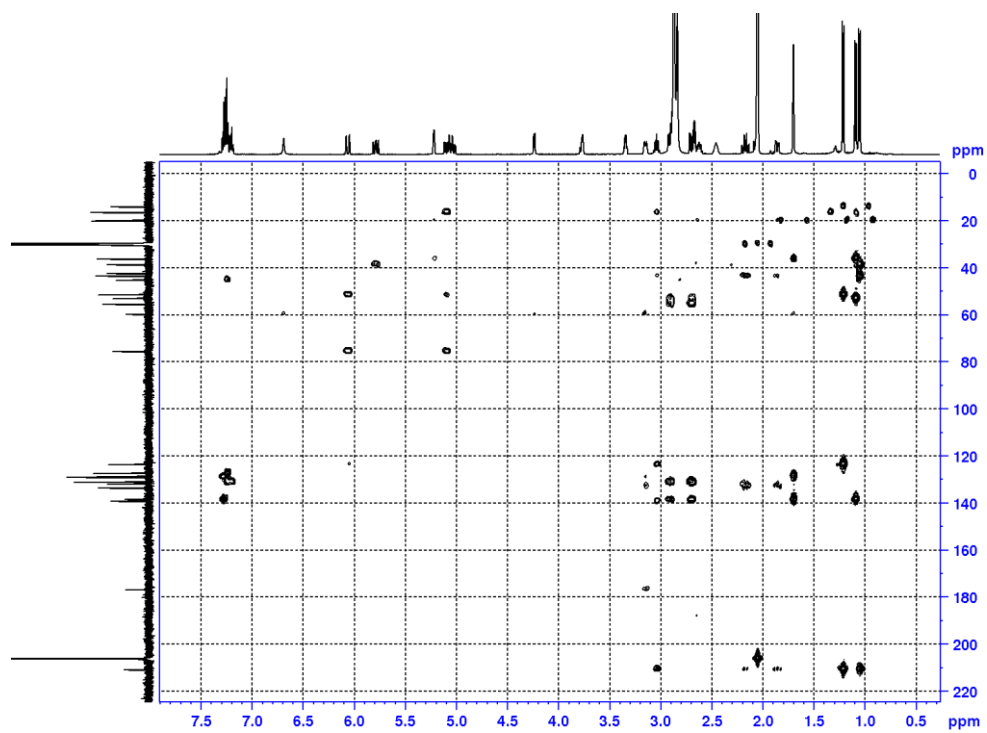

**Figure S17.** HMBC spectrum of compound **3** in Acetone- $d_6$

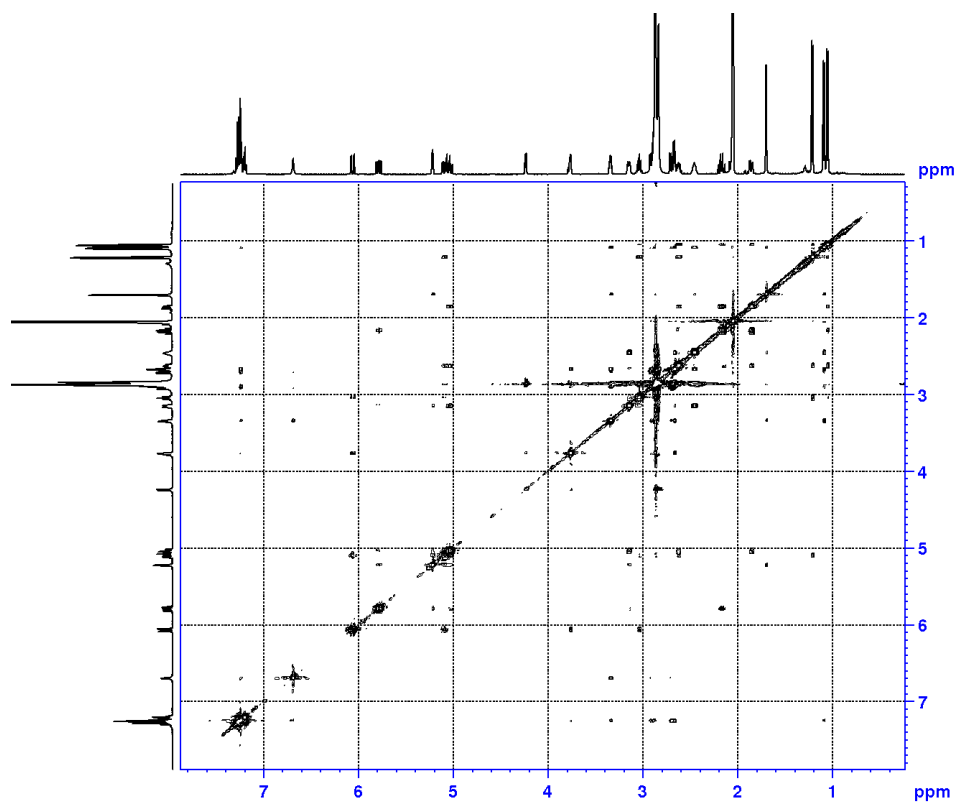

**Figure S18.** NOESY spectrum of compound **3** in Acetone- $d_6$

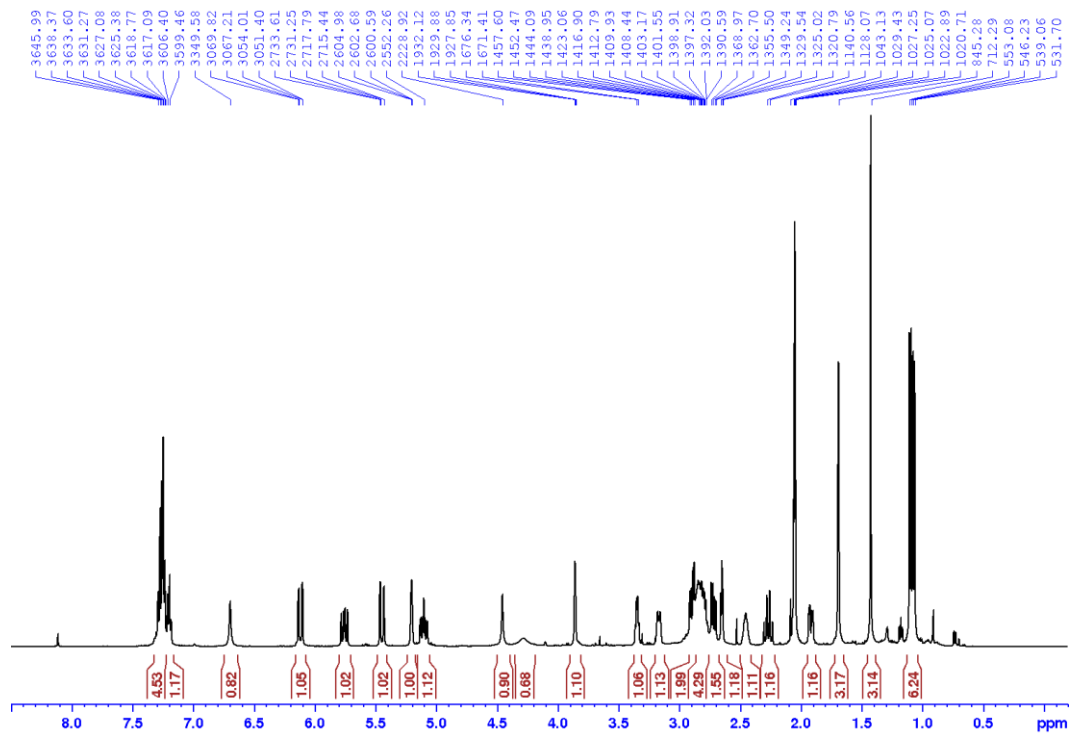

**Figure S19.**  $^1\text{H}$  NMR spectrum of compound **4** in Acetone- $d_6$

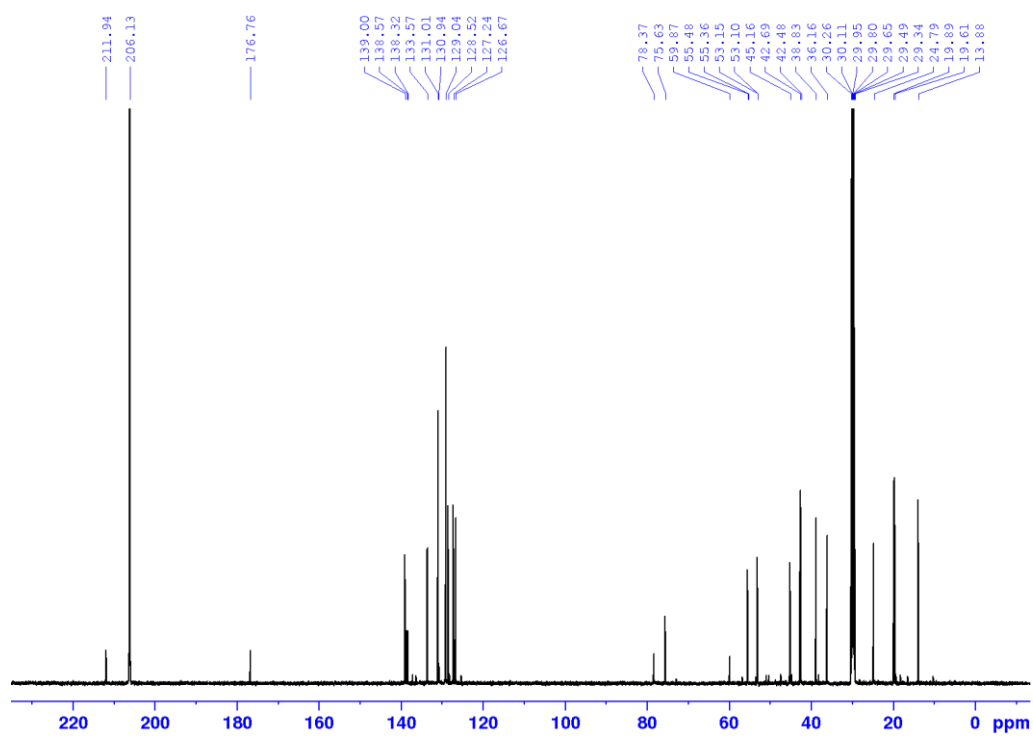

**Figure S20.**  $^{13}\text{C}$  NMR spectrum of compound **4** in Acetone- $d_6$

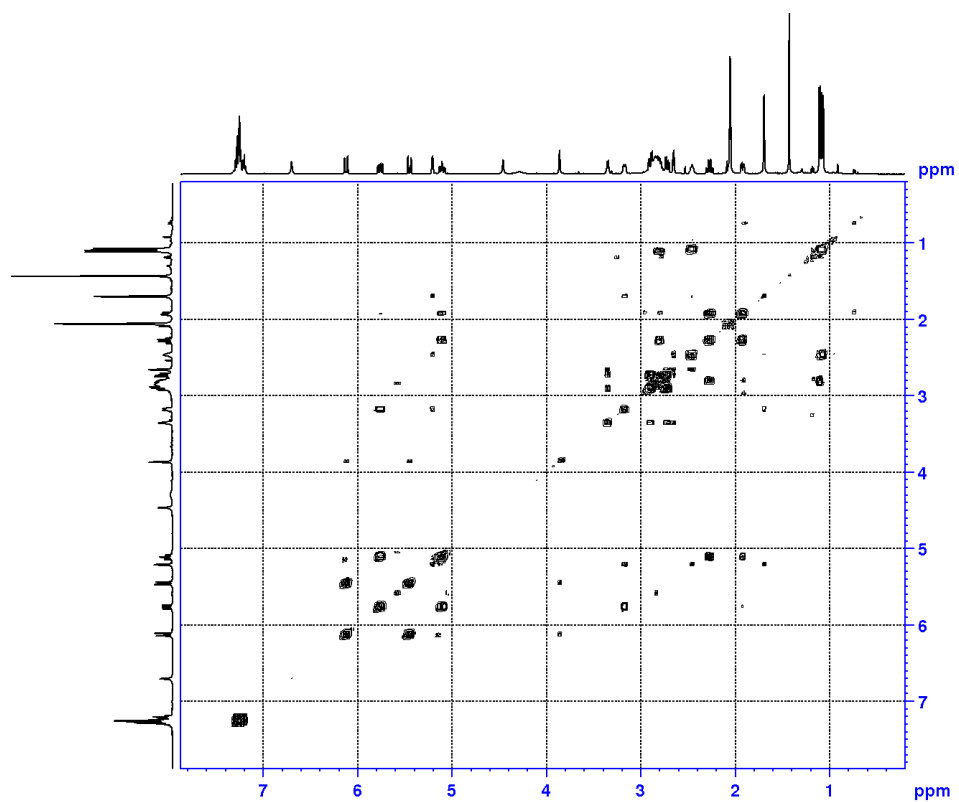

**Figure S21.** COSY spectrum of compound **4** in Acetone- $d_6$

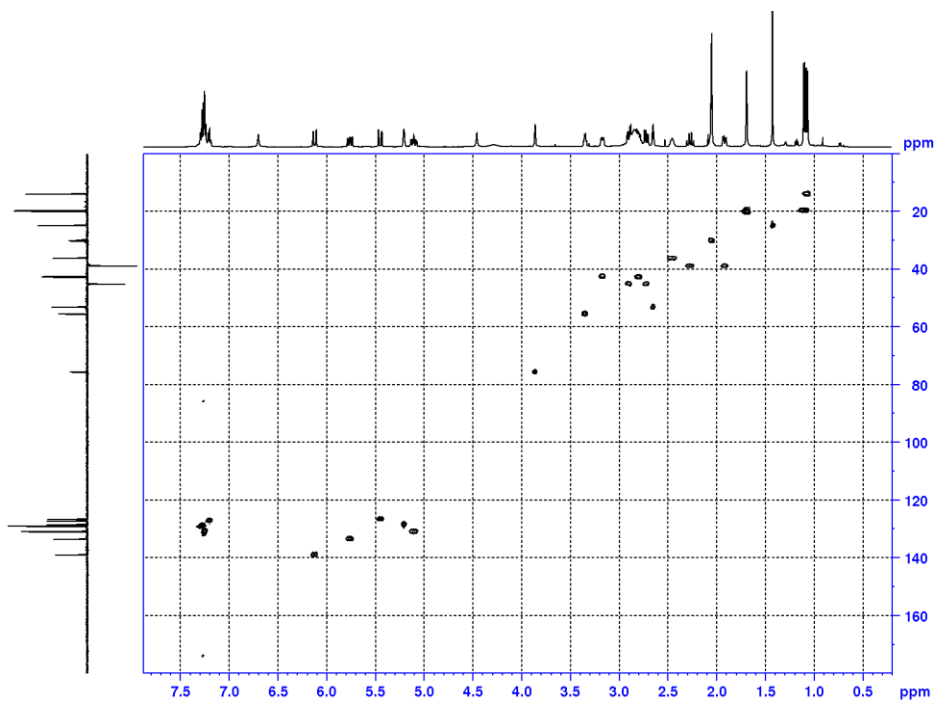

**Figure S22.** HSQC spectrum of compound **4** in Acetone- $d_6$



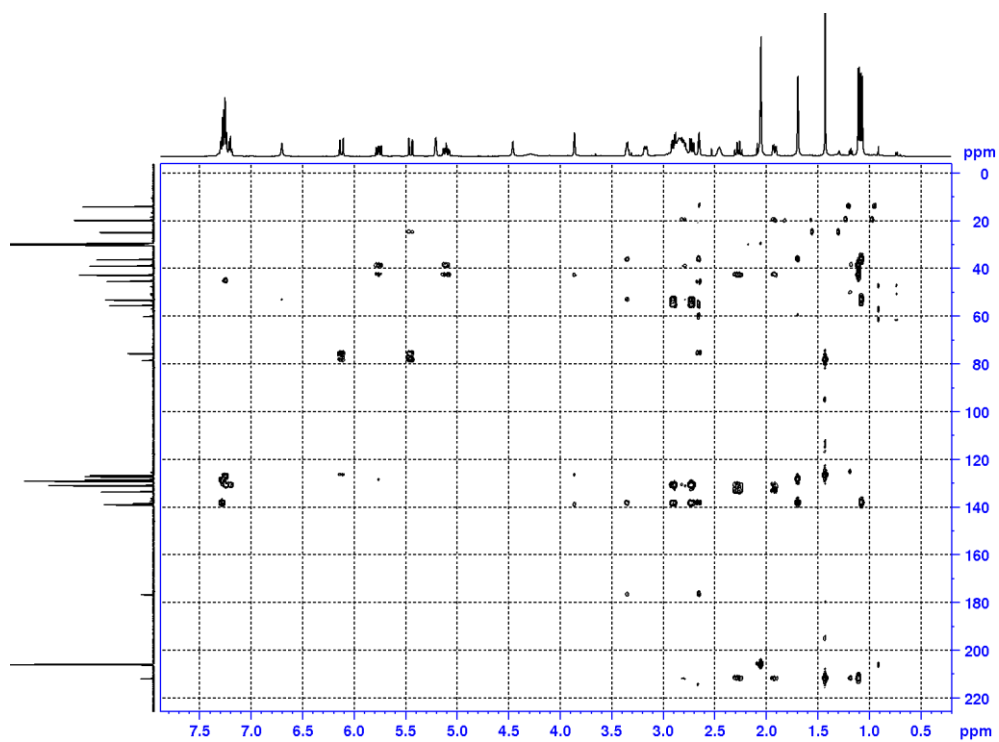

**Figure S23.** HMBC spectrum of compound **4** in Acetone- $d_6$

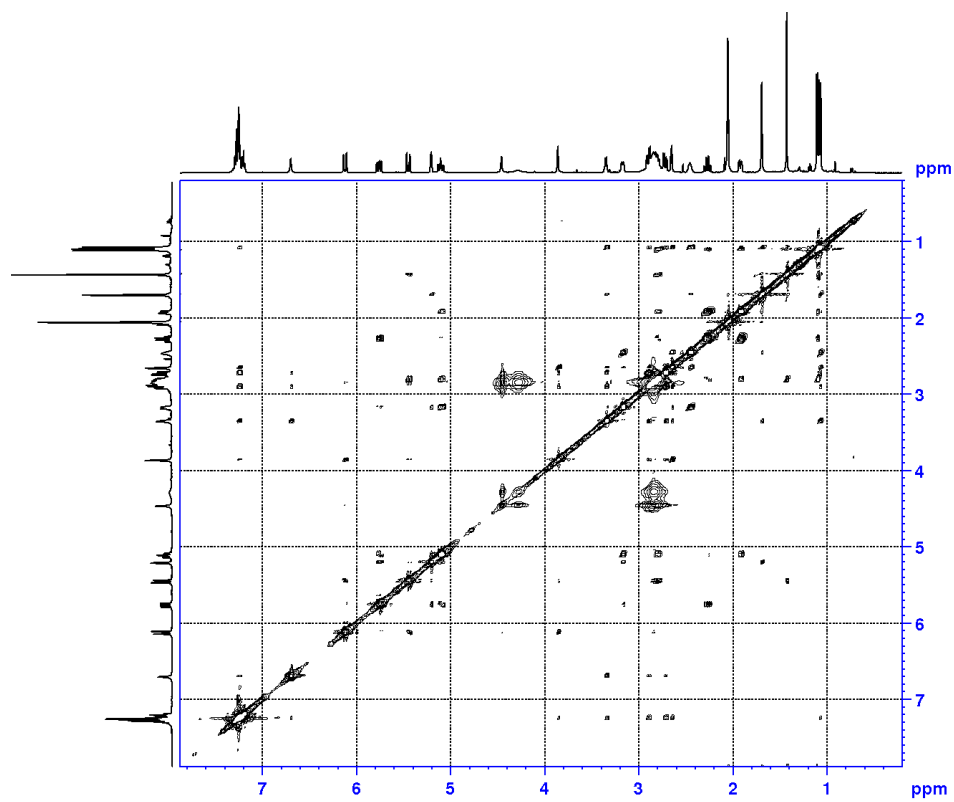

**Figure S24.** NOESY spectrum of compound **4** in Acetone- $d_6$

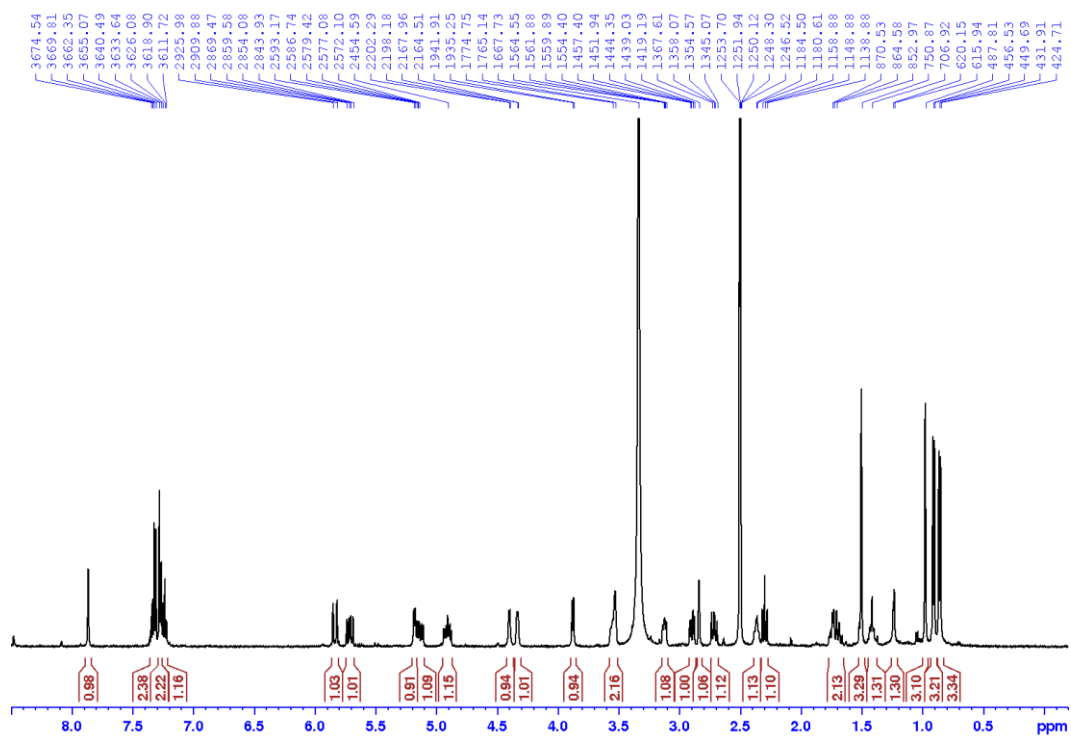

Figure S25.  $^1\text{H}$  NMR spectrum of compound **5** in  $\text{DMSO-}d_6$

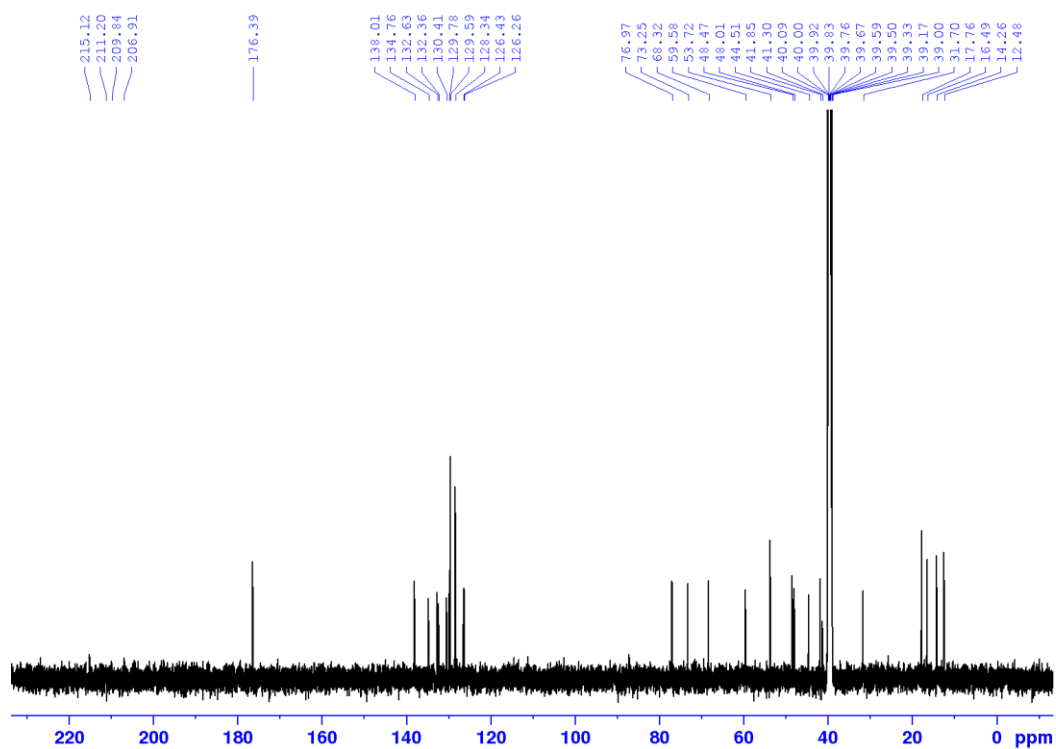

Figure S26.  $^{13}\text{C}$  NMR spectrum of compound **5** in  $\text{DMSO-}d_6$

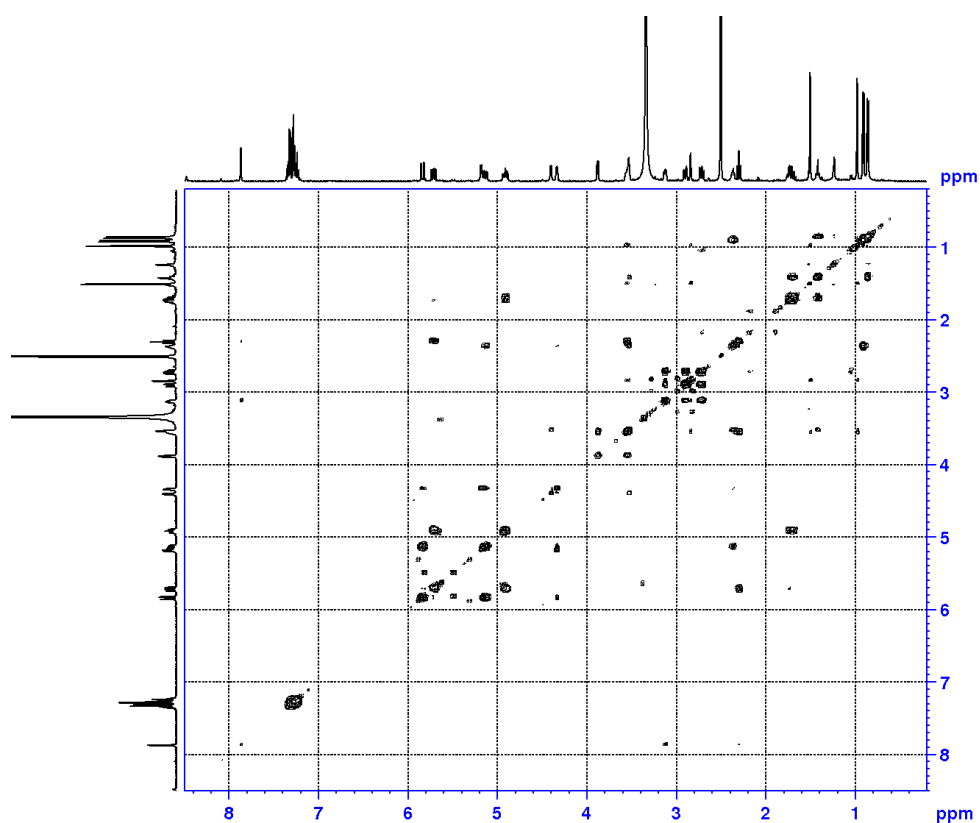

Figure S27. COSY spectrum of compound **5** in DMSO- $d_6$

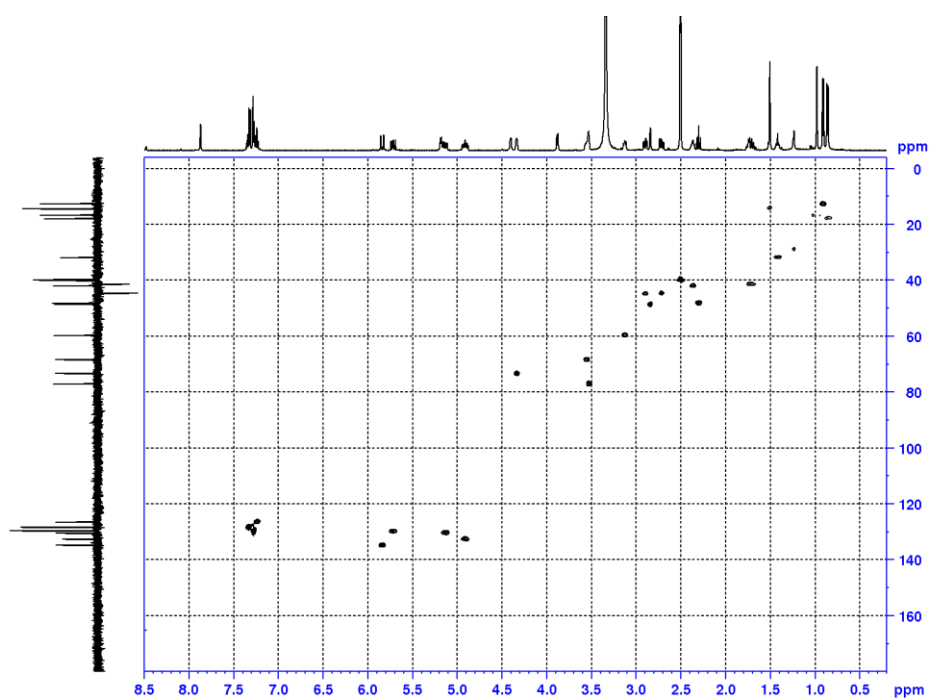

Figure S28. HSQC spectrum of compound **5** in DMSO- $d_6$

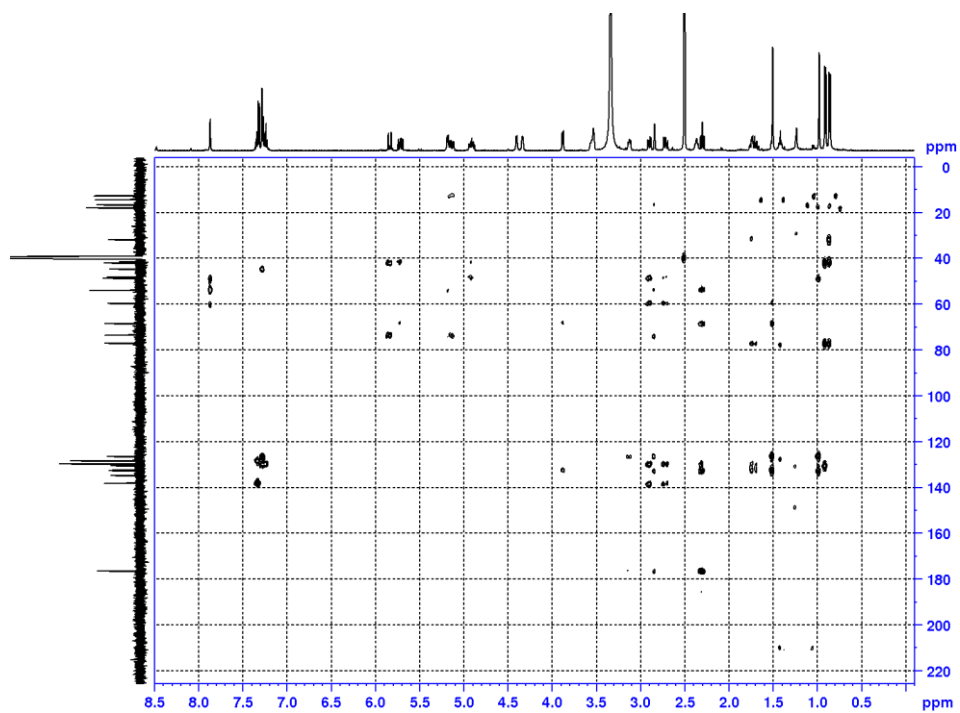

**Figure S29.** HMBC spectrum of compound **5** in DMSO-*d*<sub>6</sub>

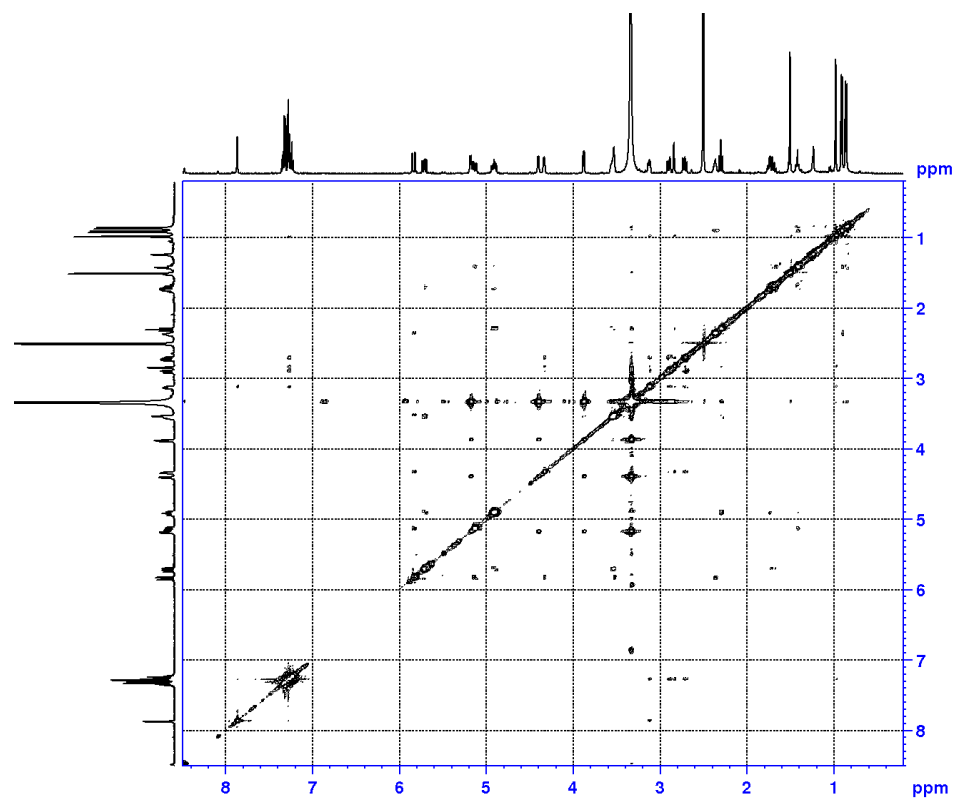

**Figure S30.** NOESY spectrum of compound **5** in DMSO-*d*<sub>6</sub>

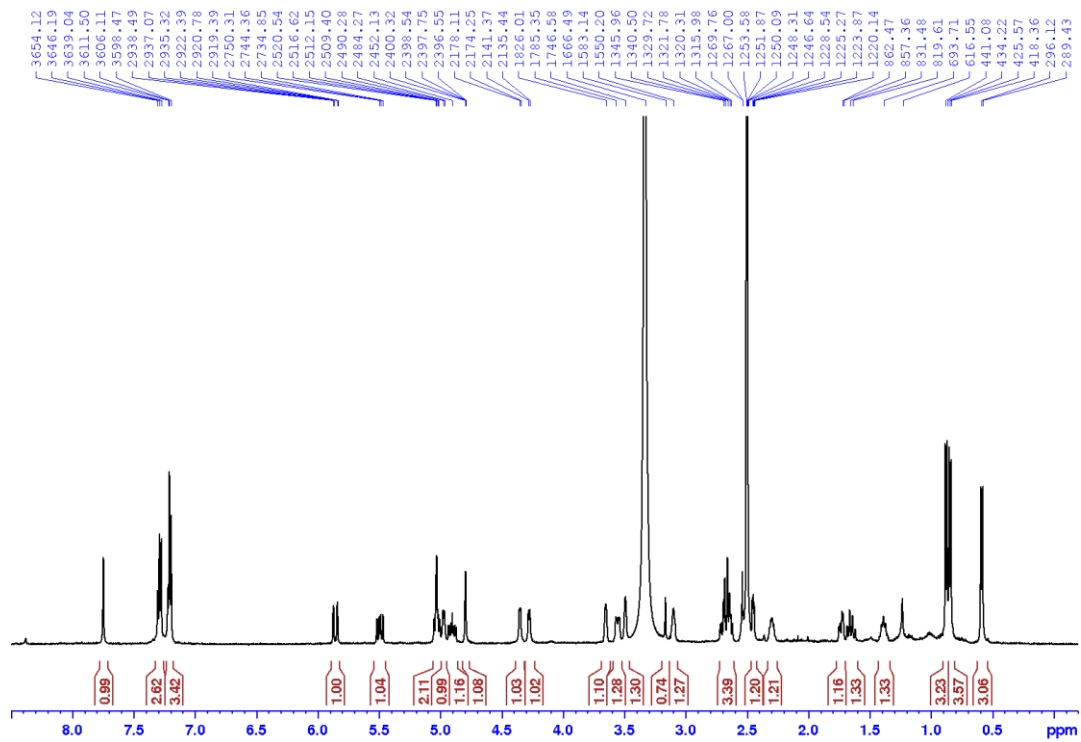

Figure S31.  $^1\text{H}$  NMR spectrum of compound **6** in  $\text{DMSO}-d_6$

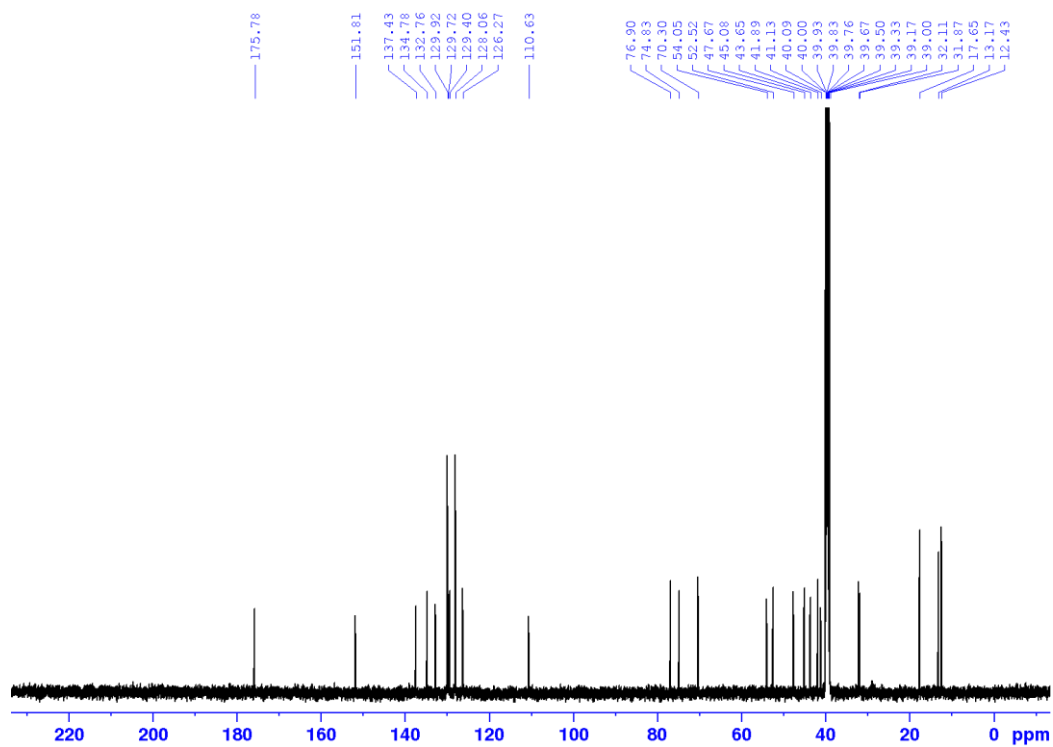

Figure S32.  $^{13}\text{C}$  NMR spectrum of compound **6** in  $\text{DMSO}-d_6$

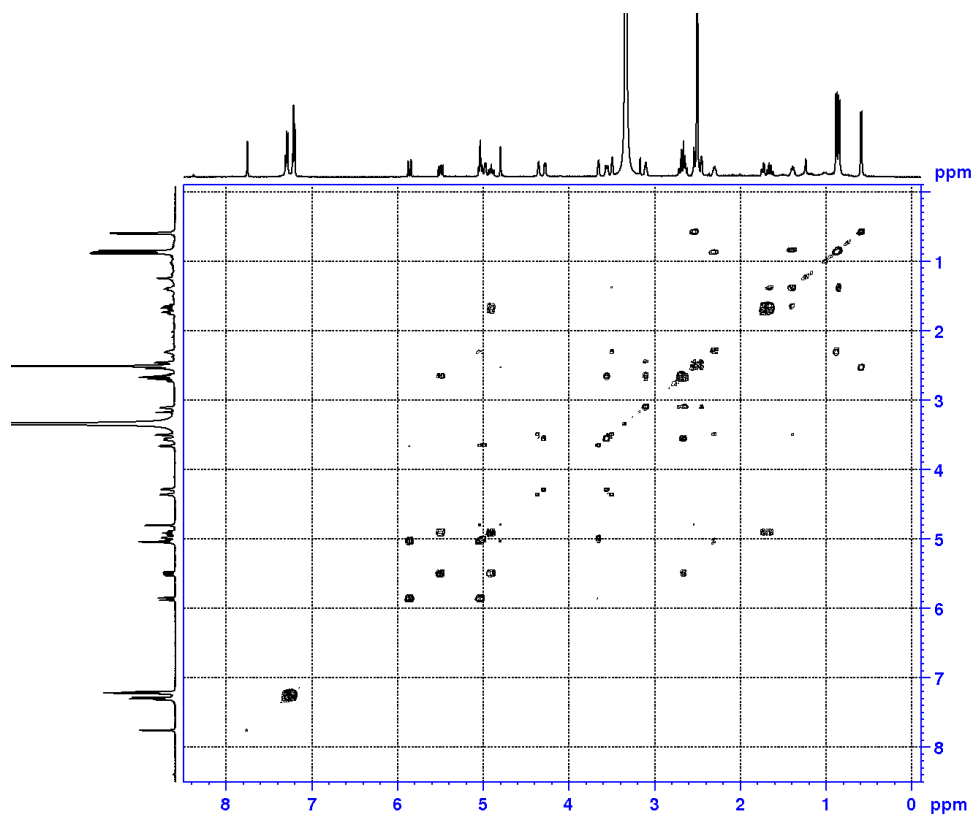

**Figure S33.** COSY spectrum of compound **6** in DMSO- $d_6$

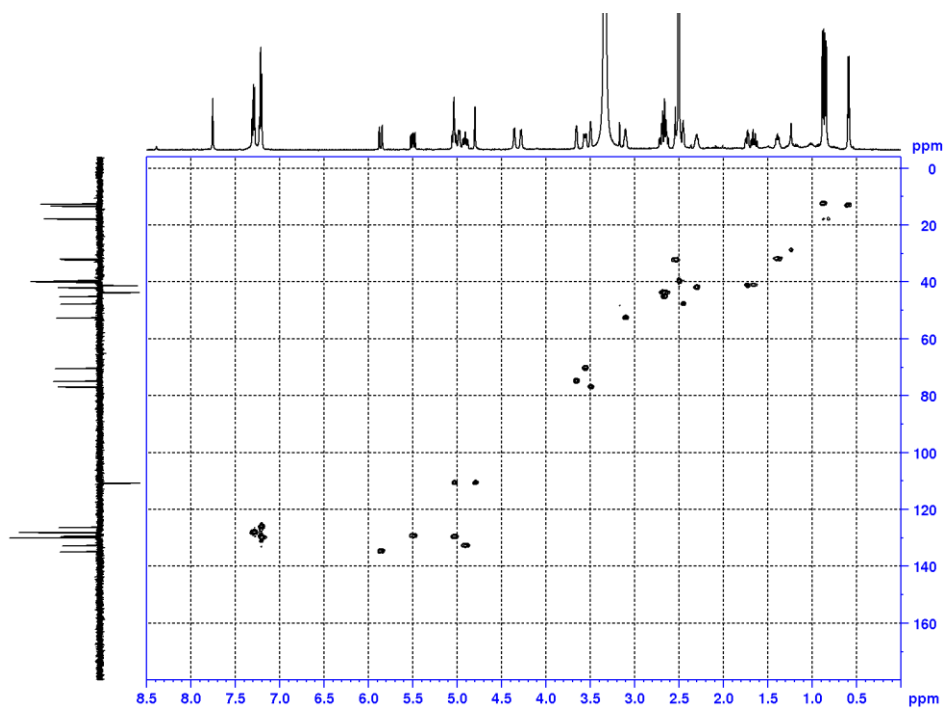

**Figure S34.** HSQC spectrum of compound **6** in DMSO- $d_6$

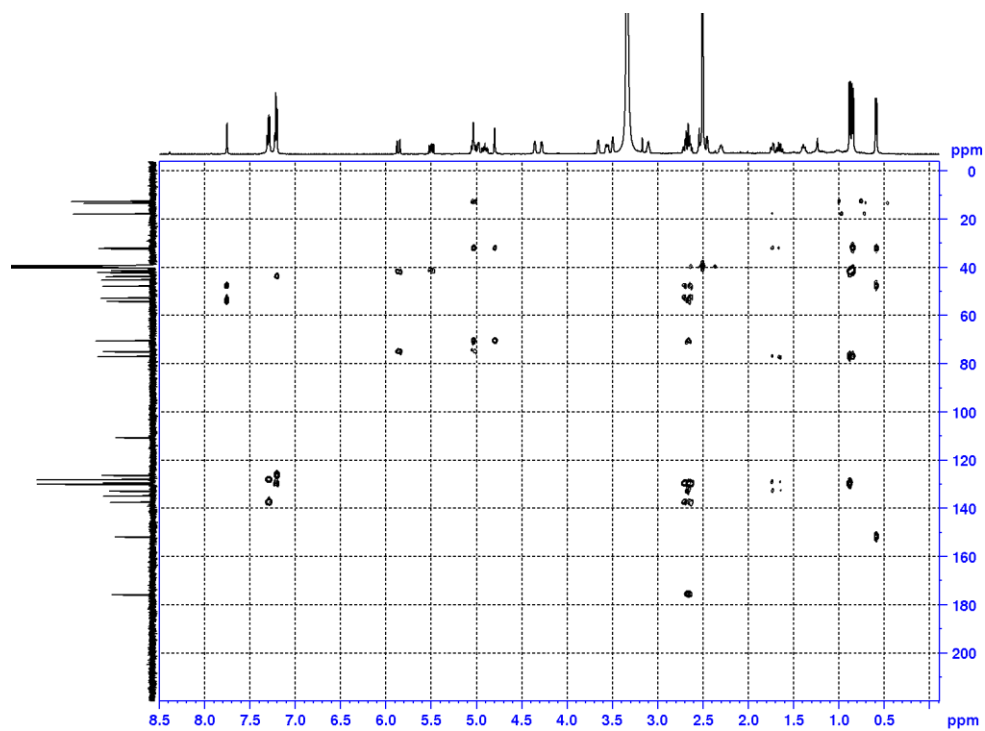

**Figure S35.** HMBC spectrum of compound **6** in DMSO-*d*<sub>6</sub>

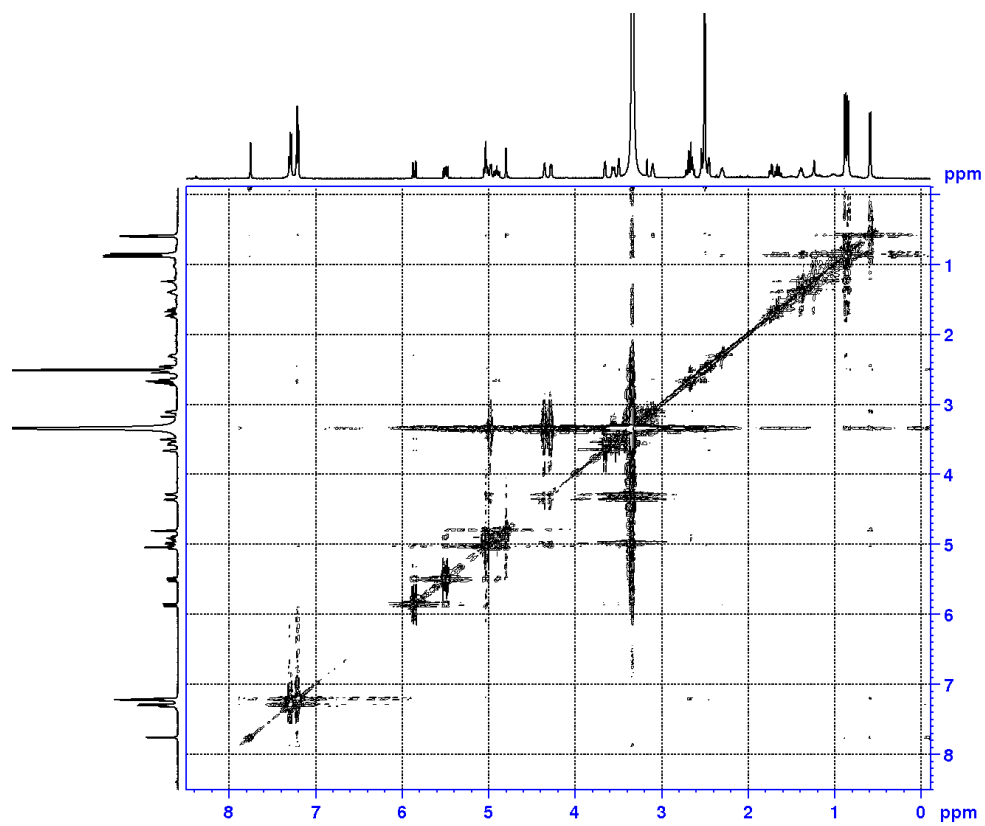

**Figure S36.** NOESY spectrum of compound **6** in DMSO-*d*<sub>6</sub>

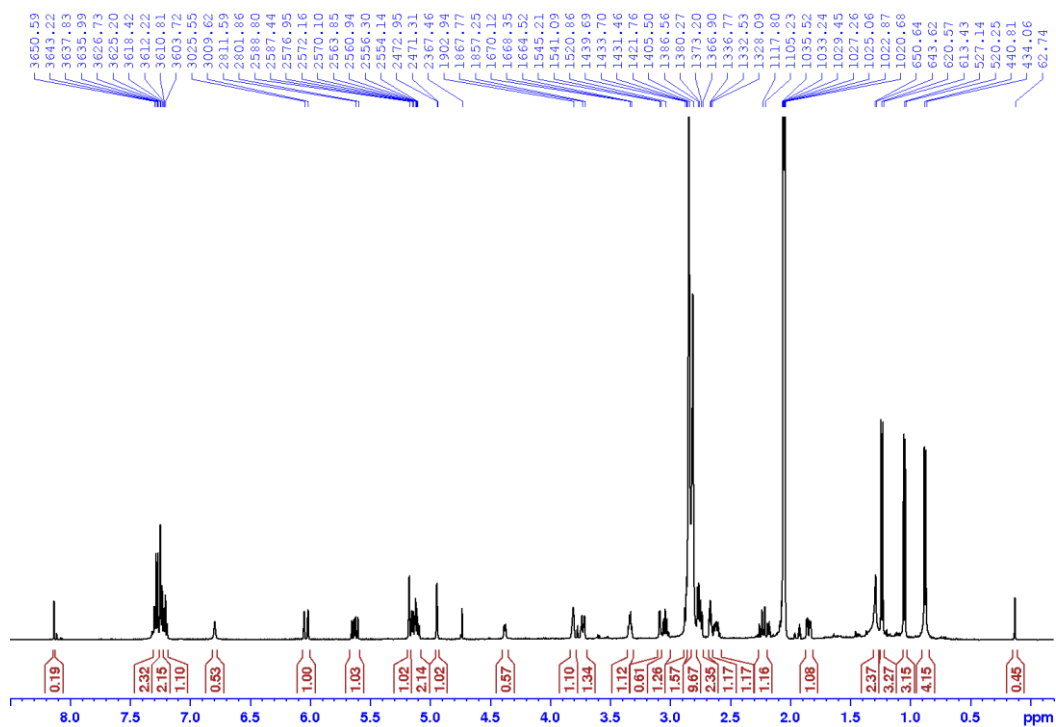

Figure S37.  $^1\text{H}$  NMR spectrum of compound **7** in Acetone- $d_6$

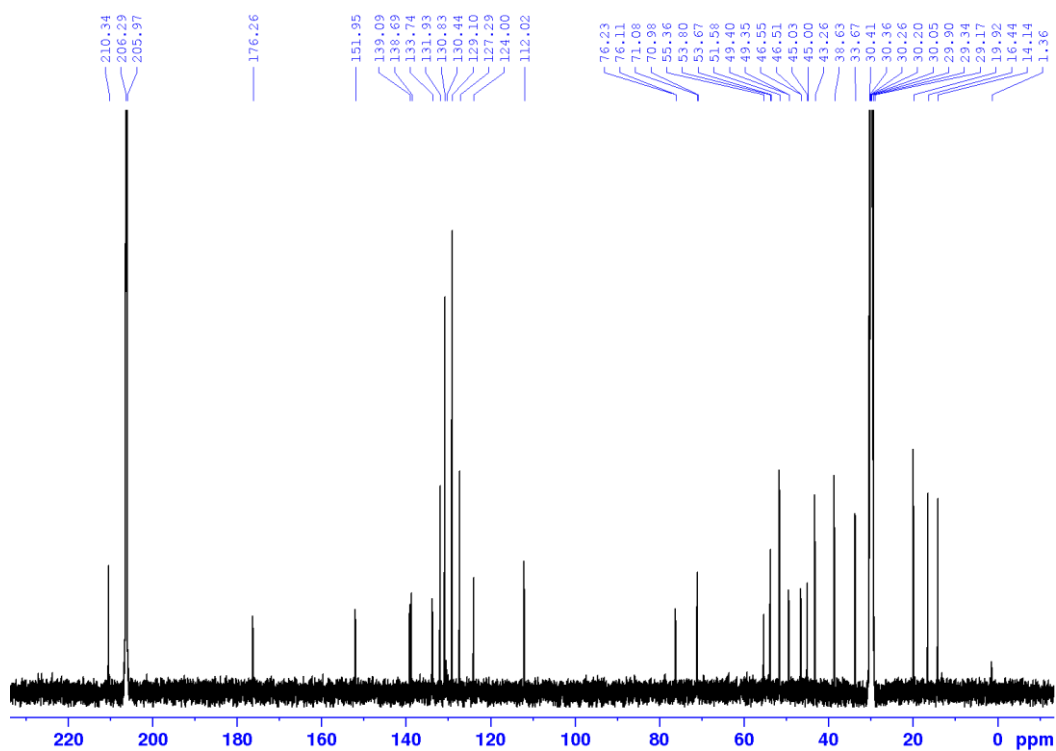

Figure S38.  $^{13}\text{C}$  NMR spectrum of compound **7** in Acetone- $d_6$



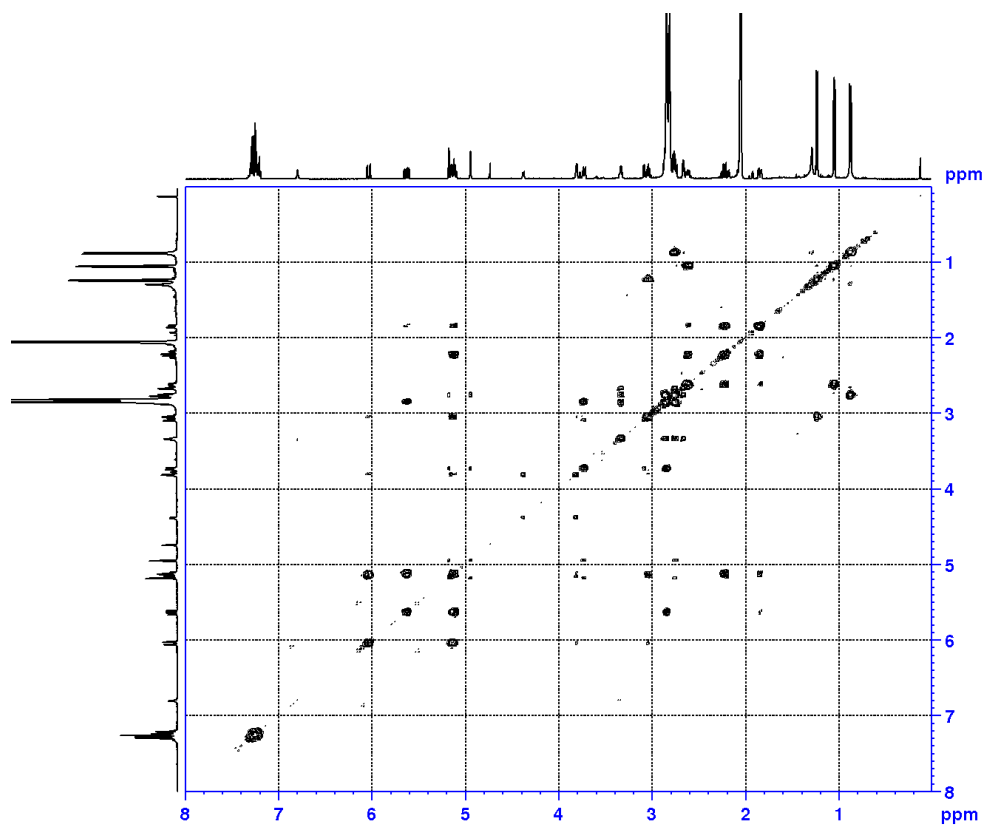

**Figure S39.** COSY spectrum of compound **7** in Acetone- $d_6$

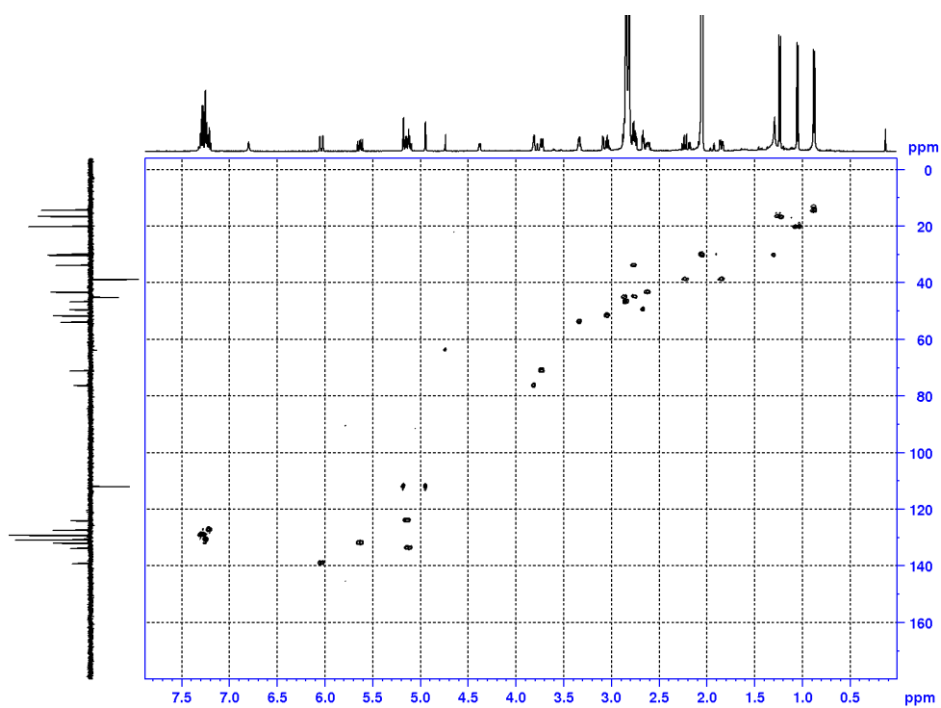

**Figure S40.** HSQC spectrum of compound **7** in Acetone- $d_6$

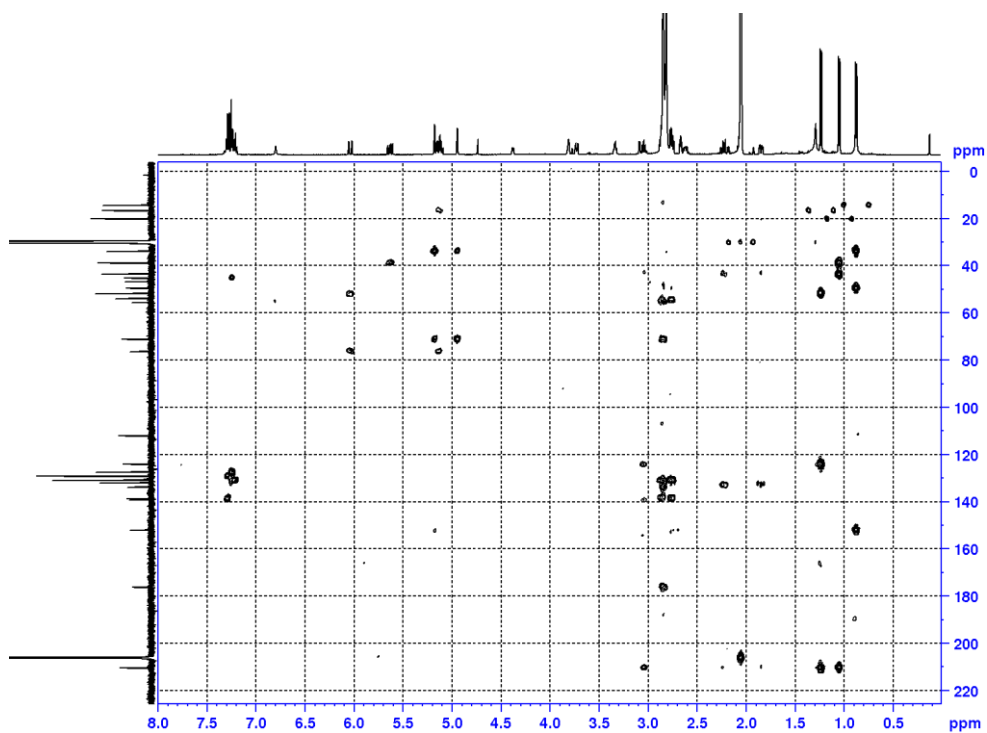

**Figure S41.** HMBC spectrum of compound **7** in Acetone-*d*<sub>6</sub>

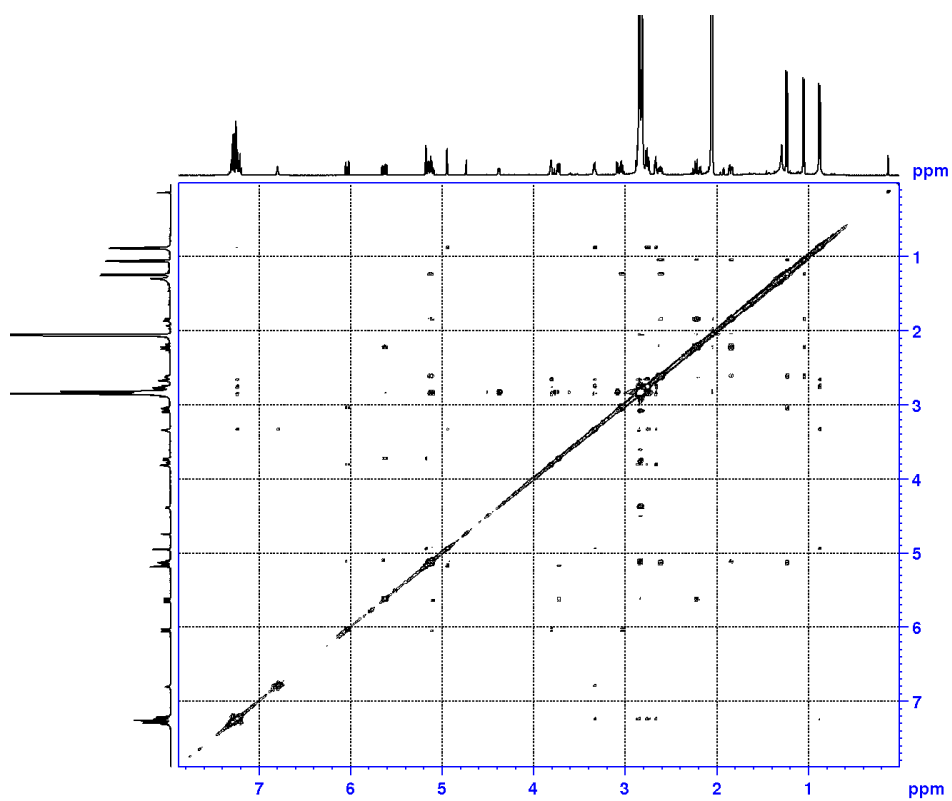

**Figure S42.** NOESY spectrum of compound **7** in Acetone-*d*<sub>6</sub>

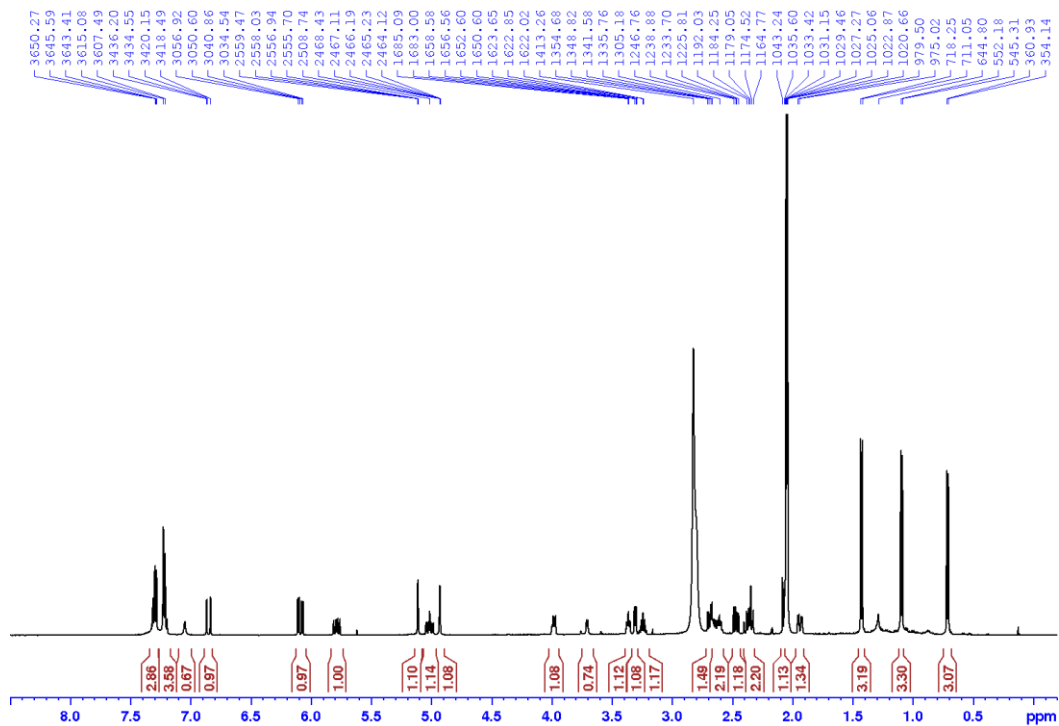

Figure S43.  $^1\text{H}$  NMR spectrum of compound **8** in Acetone- $d_6$

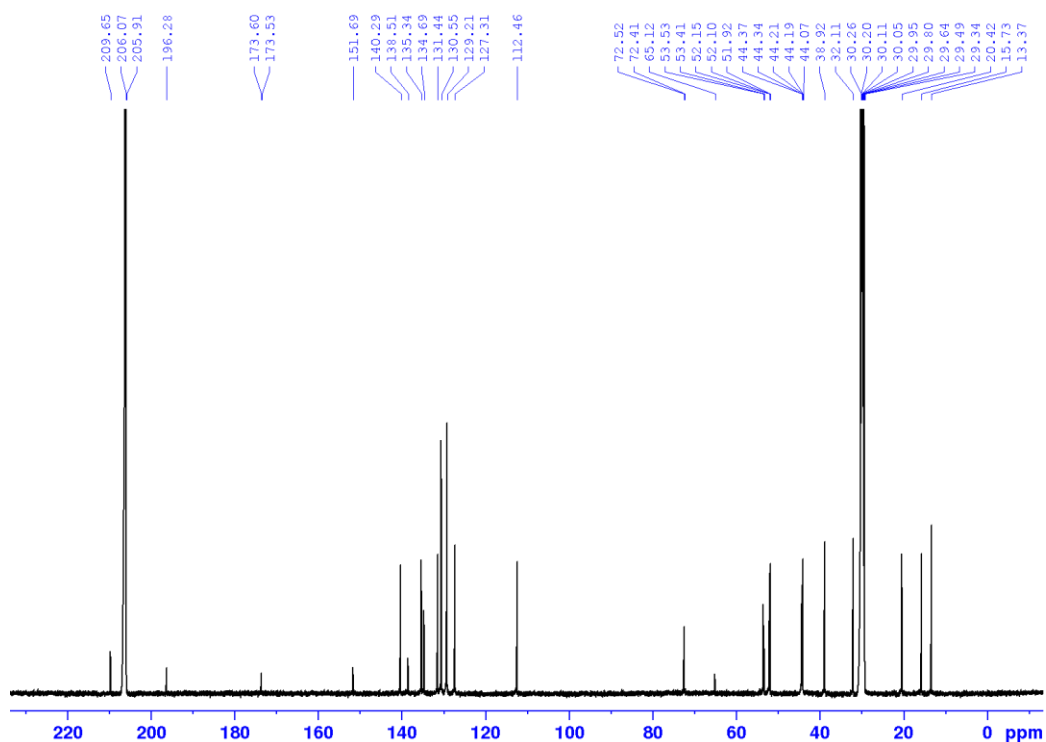

Figure S44.  $^{13}\text{C}$  NMR spectrum of compound **8** in Acetone- $d_6$

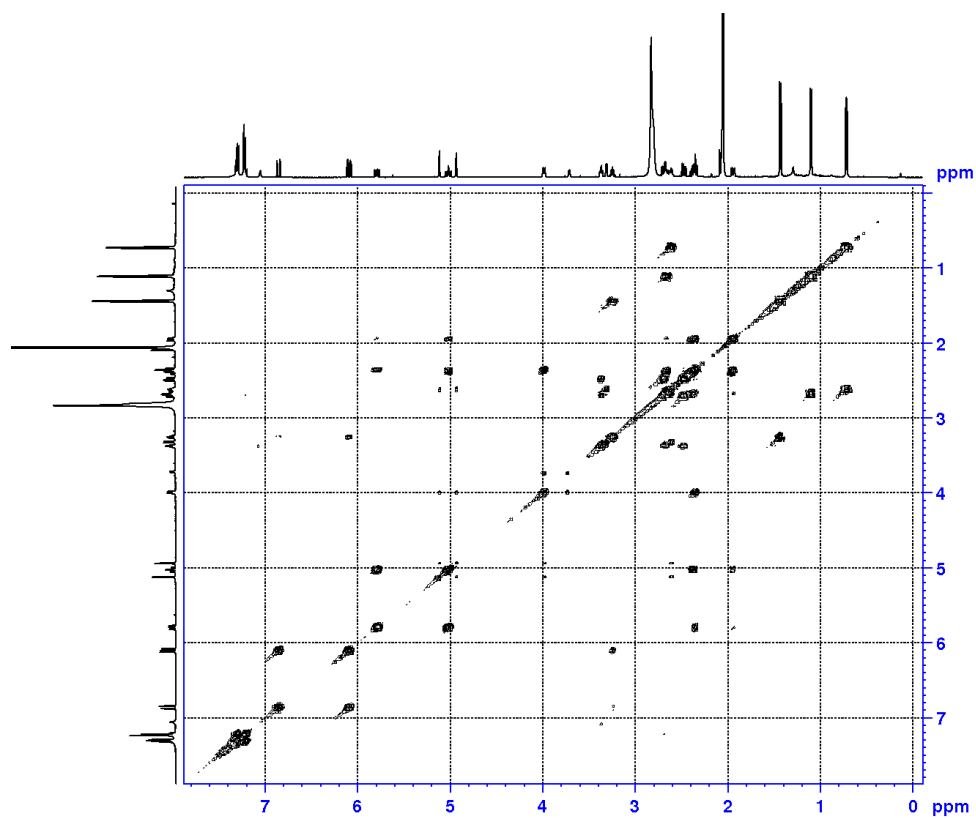

Figure S45. COSY spectrum of compound **8** in Acetone- $d_6$

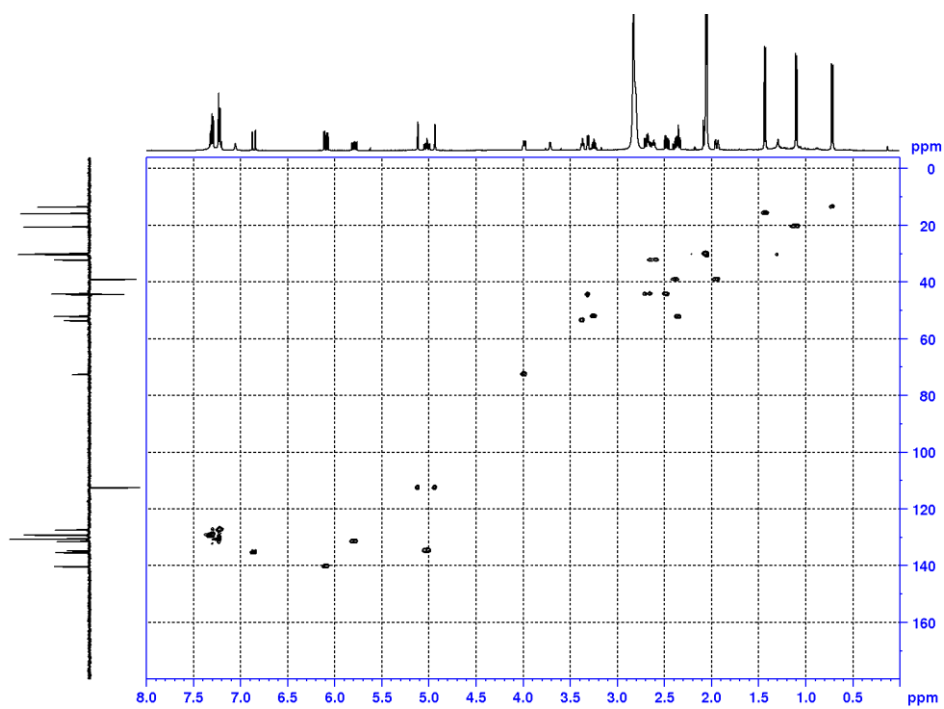

Figure S46. HSQC spectrum of compound **8** in Acetone- $d_6$

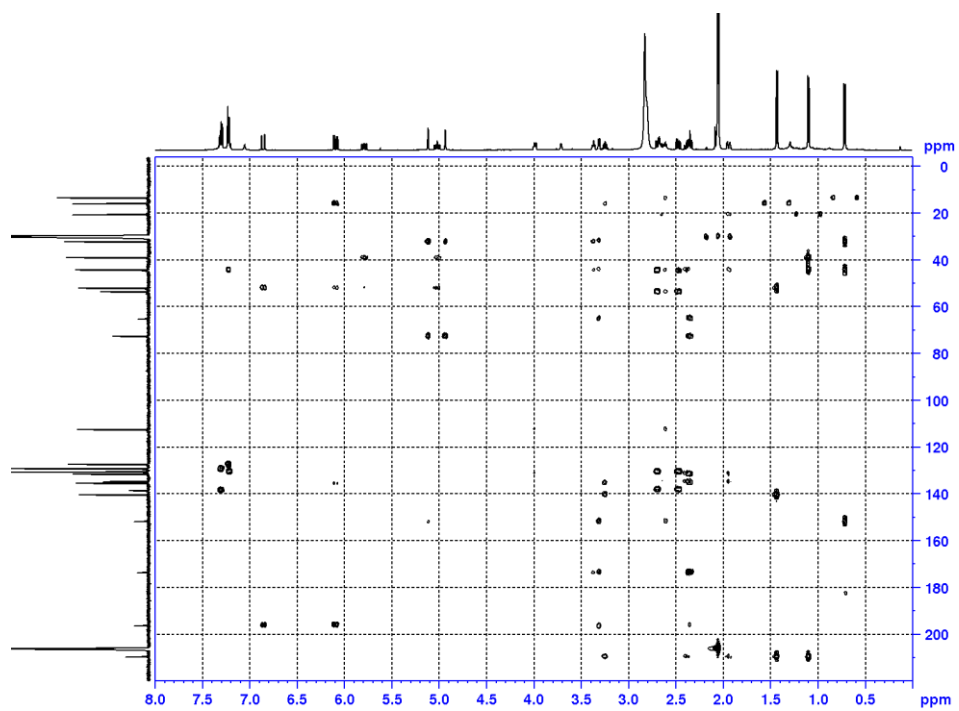

**Figure S47.** HMBC spectrum of compound **8** in Acetone- $d_6$

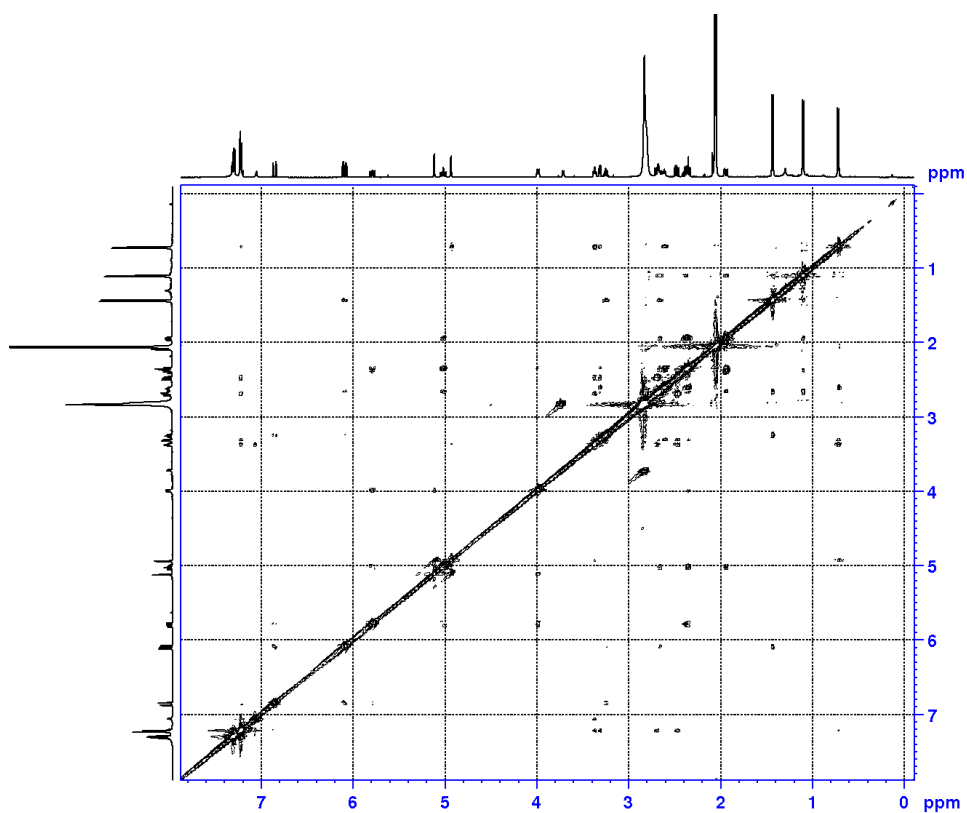

**Figure S48.** NOESY spectrum of compound **8** in Acetone- $d_6$

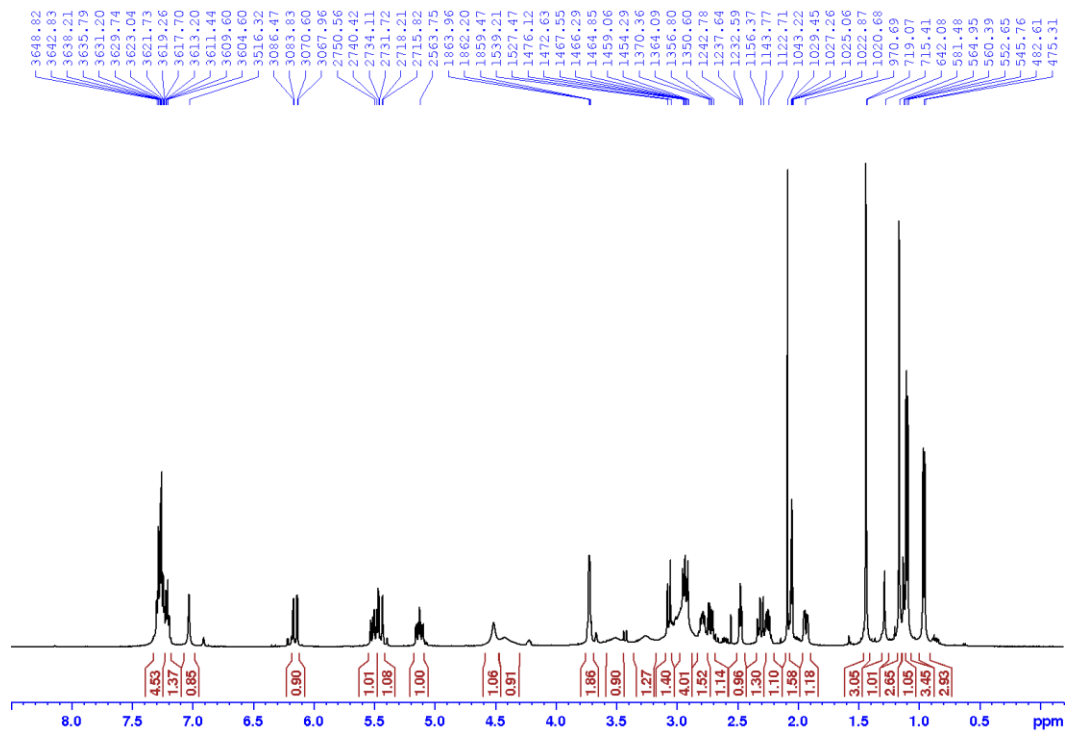

Figure S49.  $^1\text{H}$  NMR spectrum of compound **9** in Acetone- $d_6$

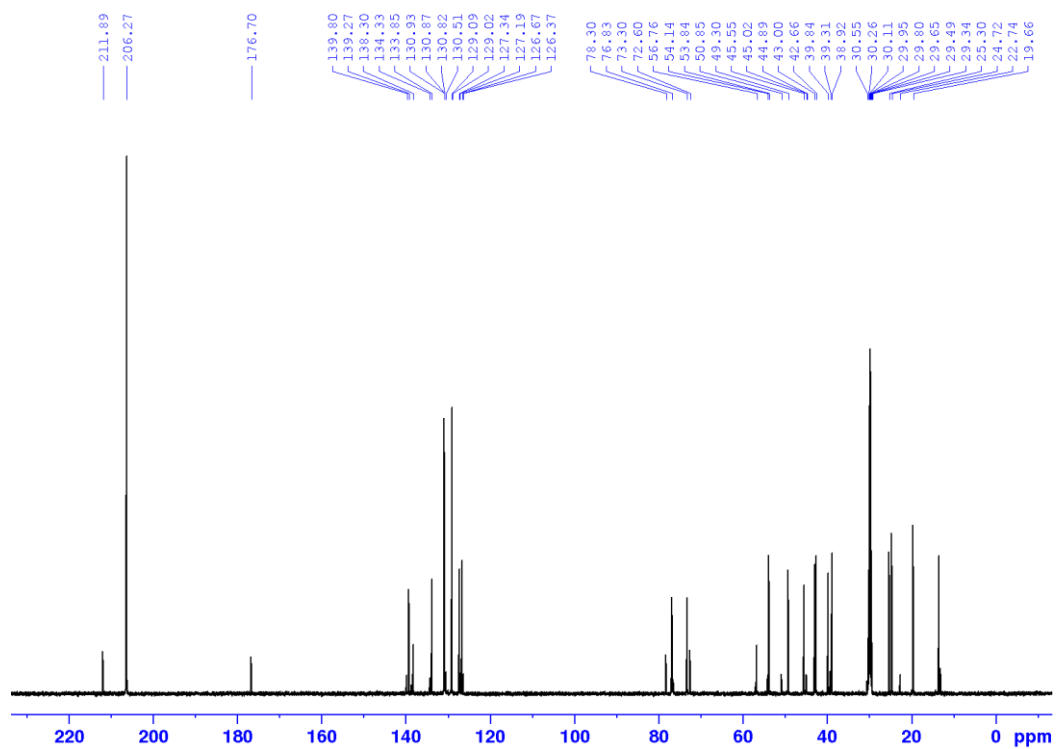

Figure S50.  $^{13}\text{C}$  NMR spectrum of compound **9** in Acetone- $d_6$

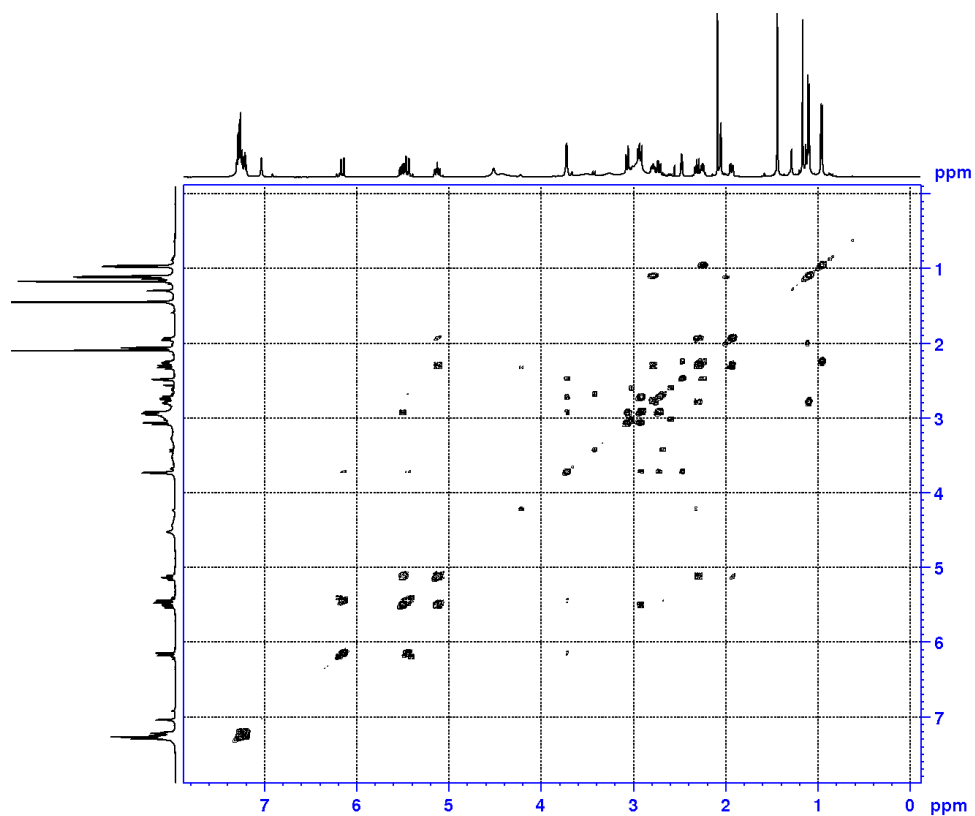

**Figure S51.** COSY spectrum of compound **9** in Acetone- $d_6$

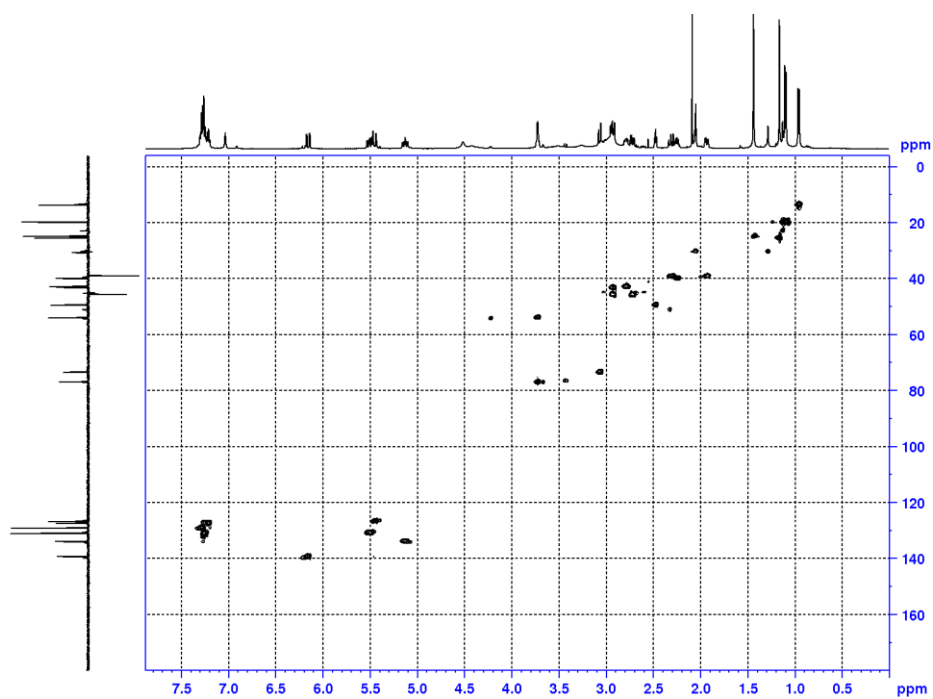

**Figure S52.** HSQC spectrum of compound **9** in Acetone- $d_6$

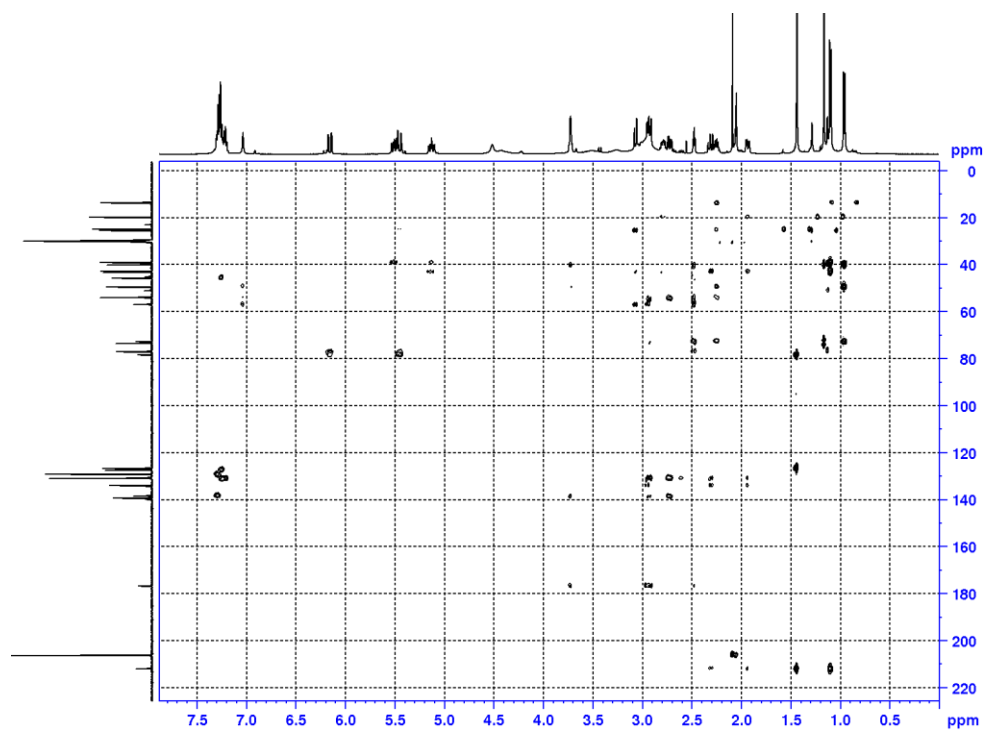

**Figure S53.** HMBC spectrum of compound **9** in Acetone- $d_6$

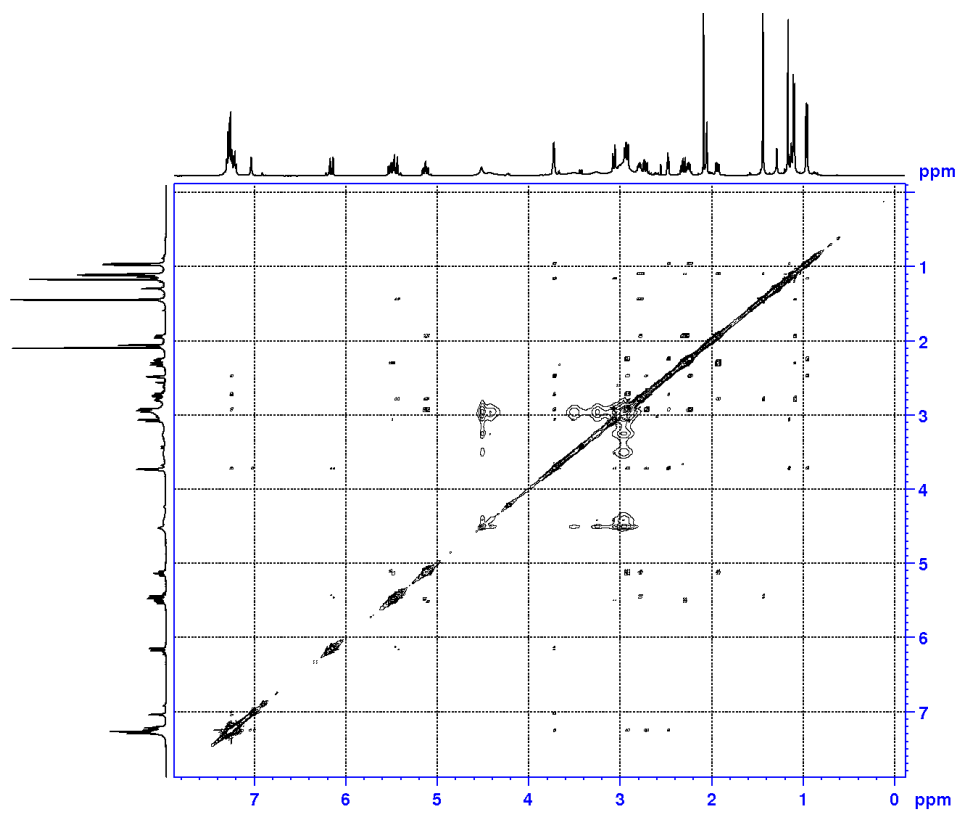

**Figure S54.** NOESY spectrum of compound **9** in Acetone- $d_6$



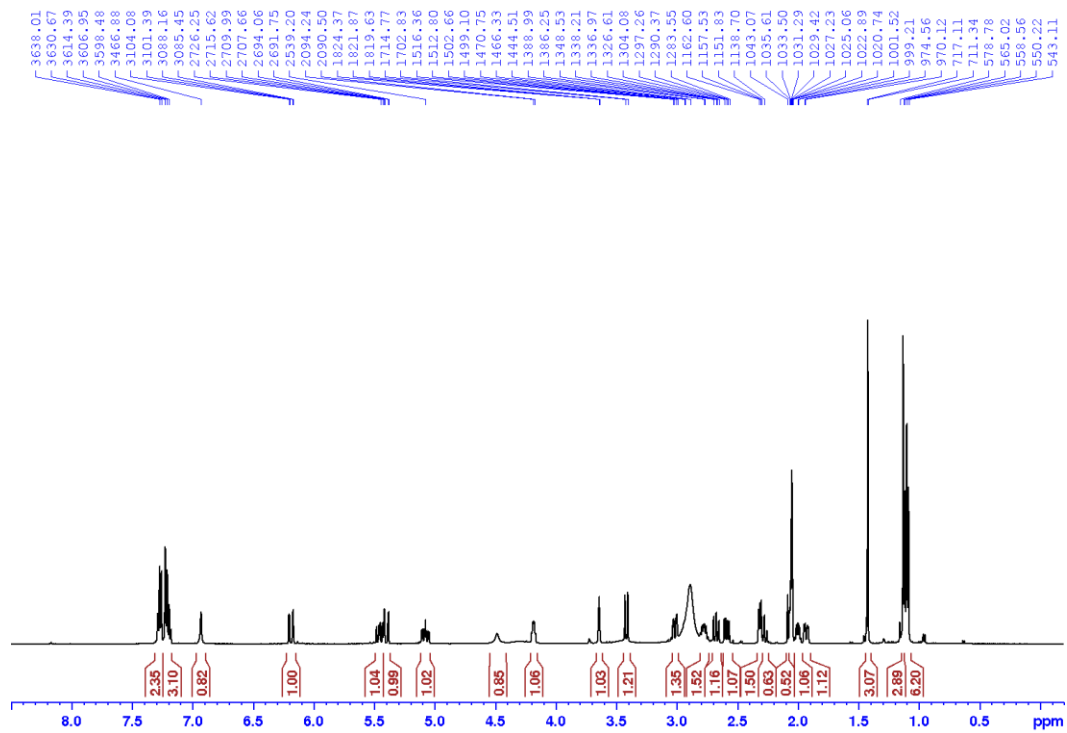

Figure S55.  $^1\text{H}$  NMR spectrum of compound **10** in Acetone- $d_6$

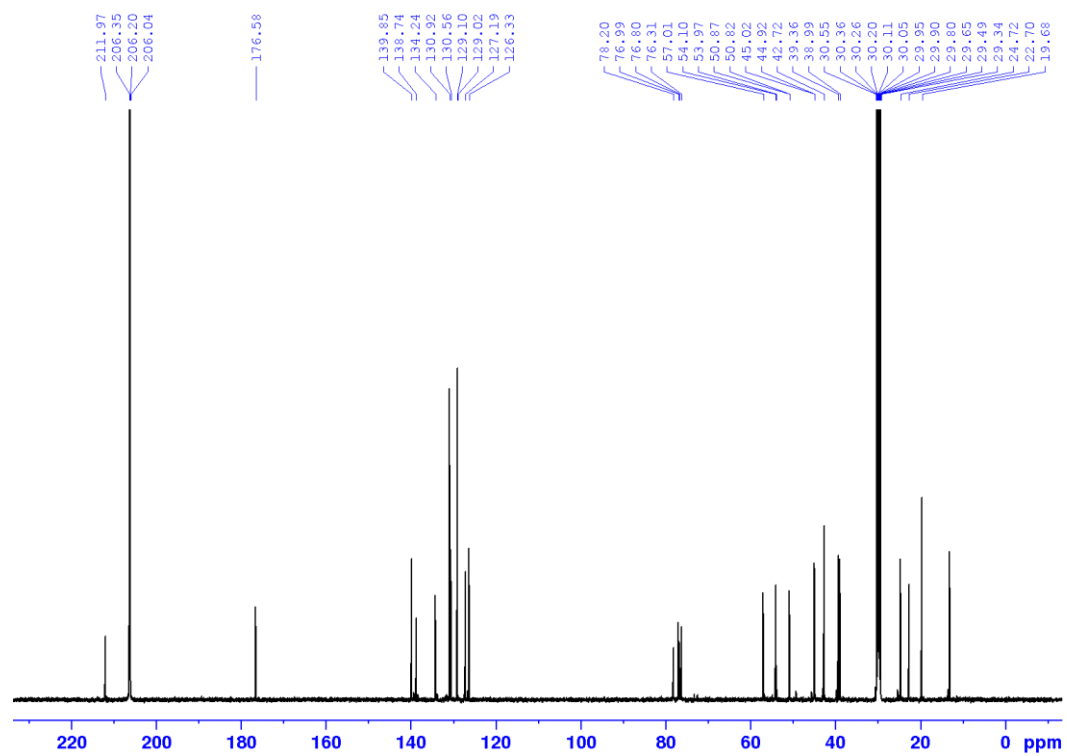

Figure S56.  $^{13}\text{C}$  NMR spectrum of compound **10** in Acetone- $d_6$

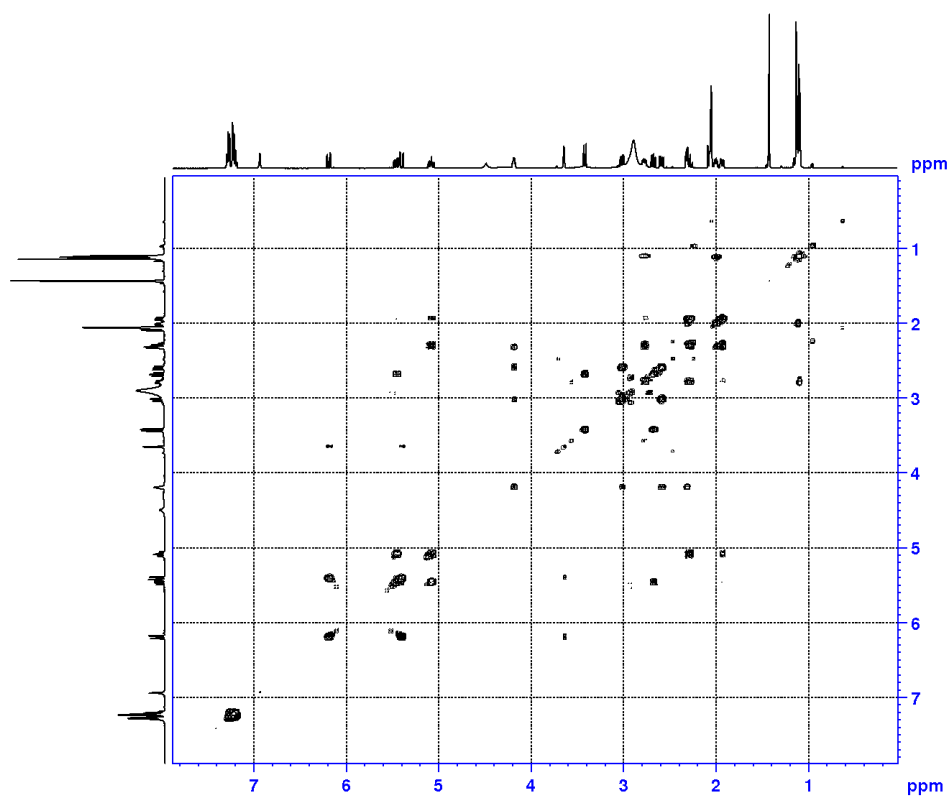

**Figure S57.** COSY spectrum of compound **10** in Acetone- $d_6$

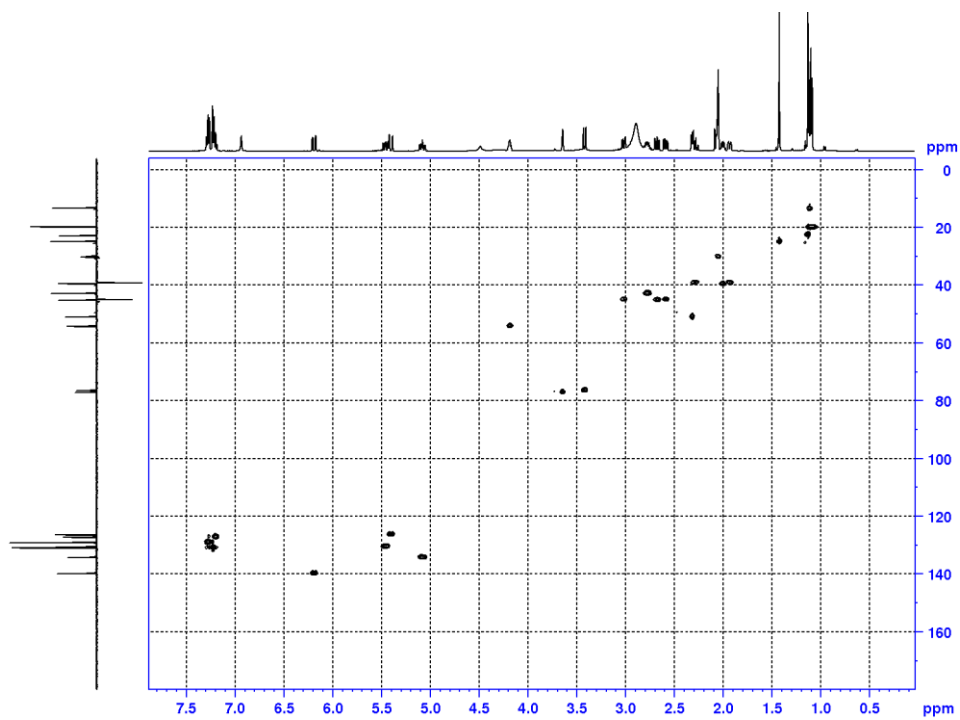

**Figure S58.** HSQC spectrum of compound **10** in Acetone- $d_6$

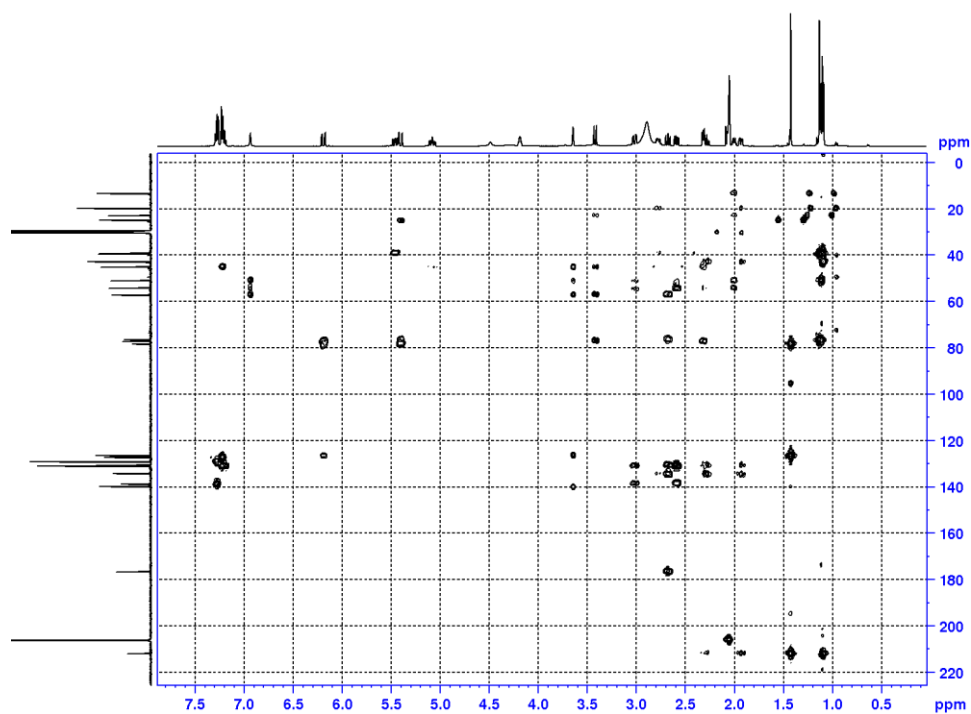

**Figure S59.** HMBC spectrum of compound **10** in Acetone- $d_6$

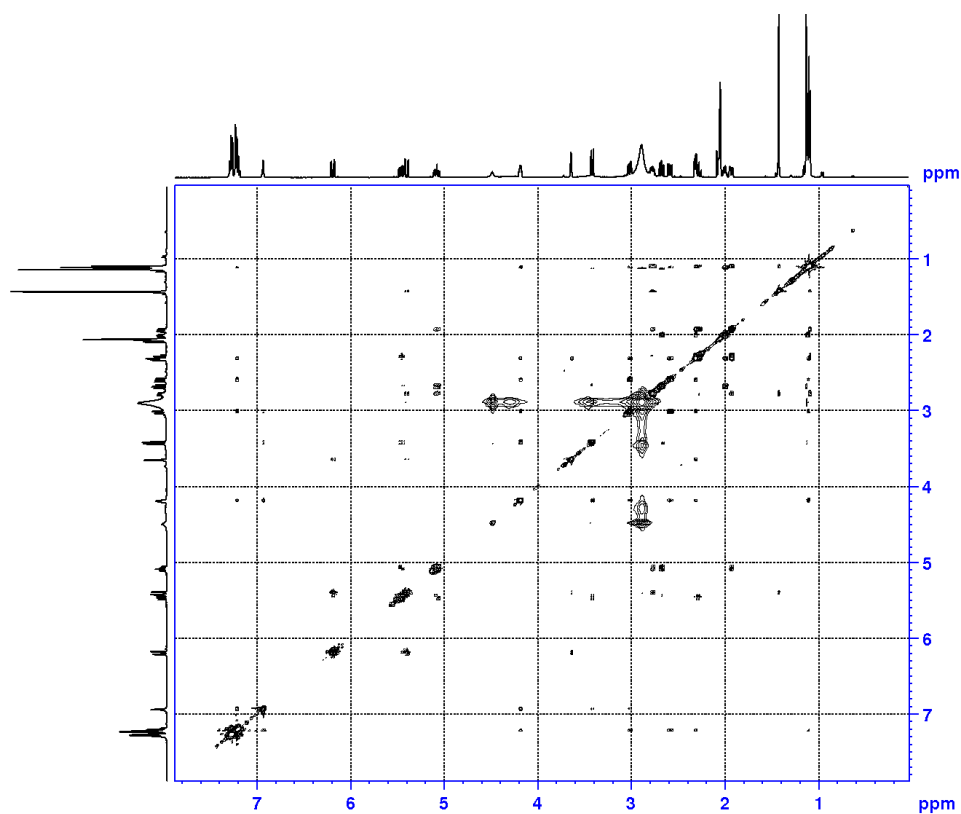

**Figure S60.** NOESY spectrum of compound **10** in Acetone- $d_6$

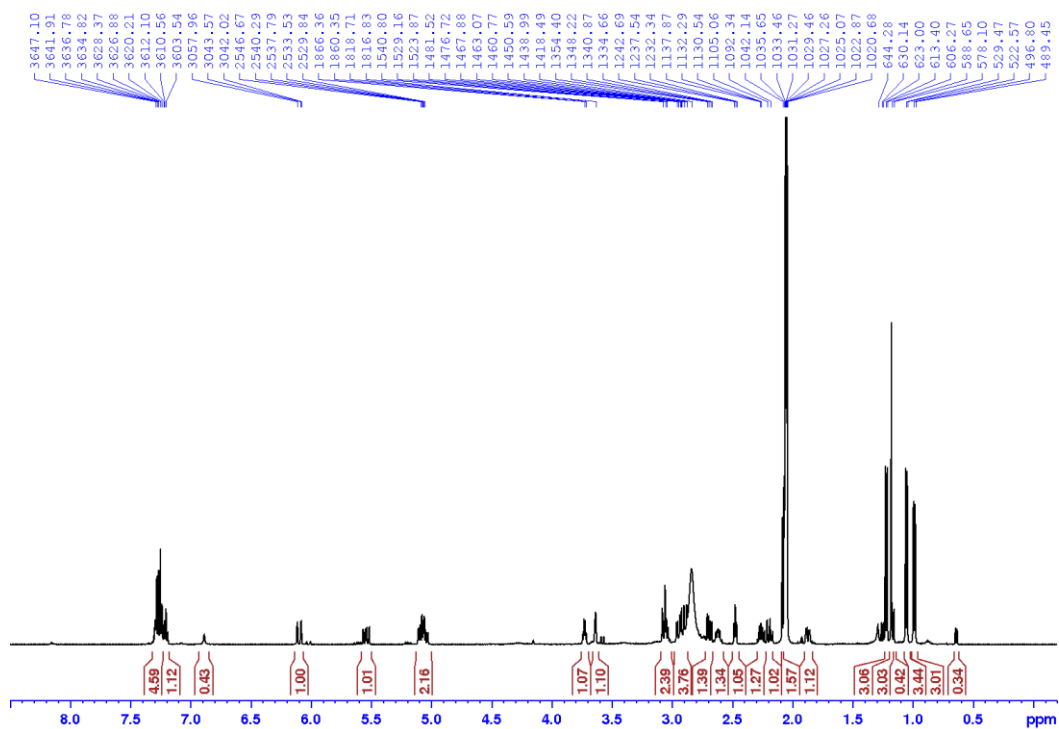

Figure S61.  $^1\text{H}$  NMR spectrum of compound **11** in Acetone- $d_6$

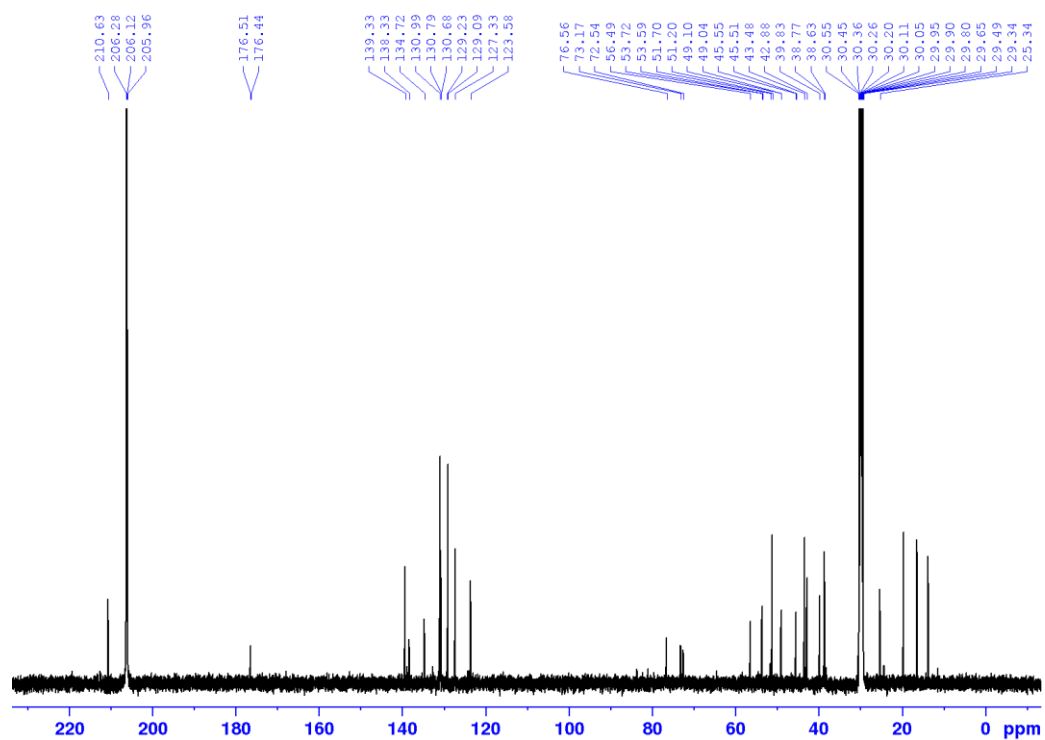

Figure S62.  $^{13}\text{C}$  NMR spectrum of compound **11** in Acetone- $d_6$

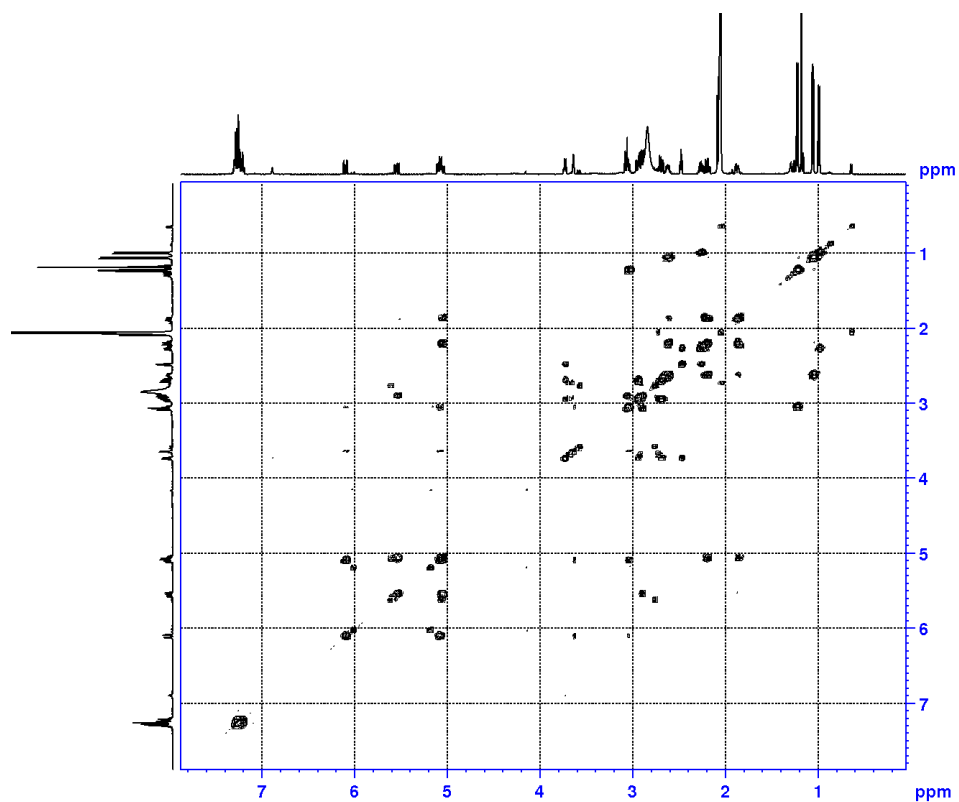

Figure S63. COSY spectrum of compound **11** in Acetone- $d_6$

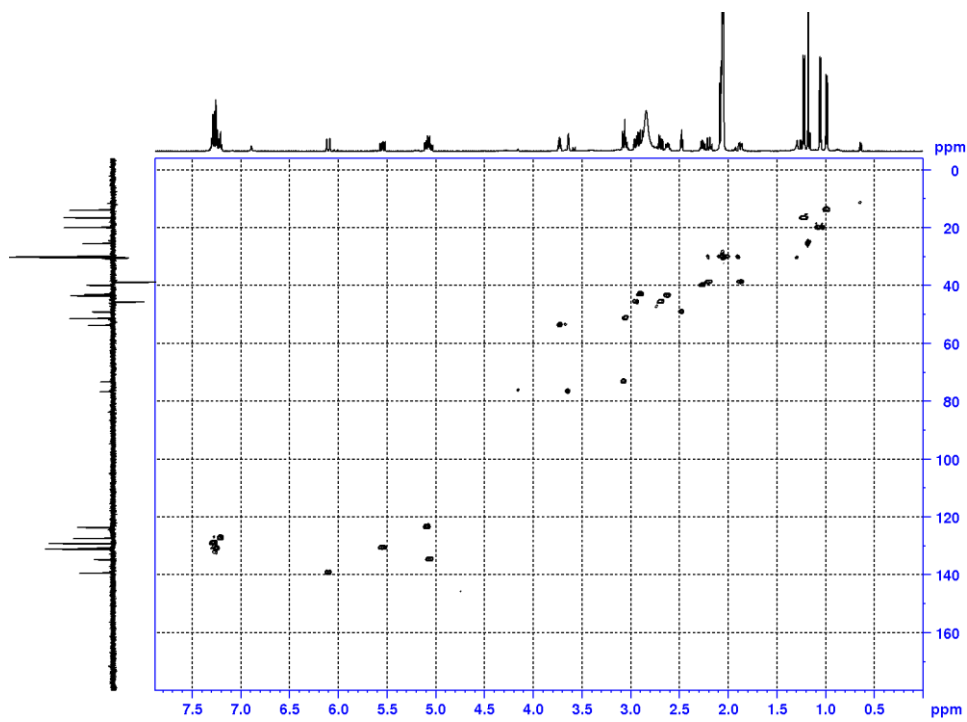

Figure S64. HSQC spectrum of compound **11** in Acetone- $d_6$

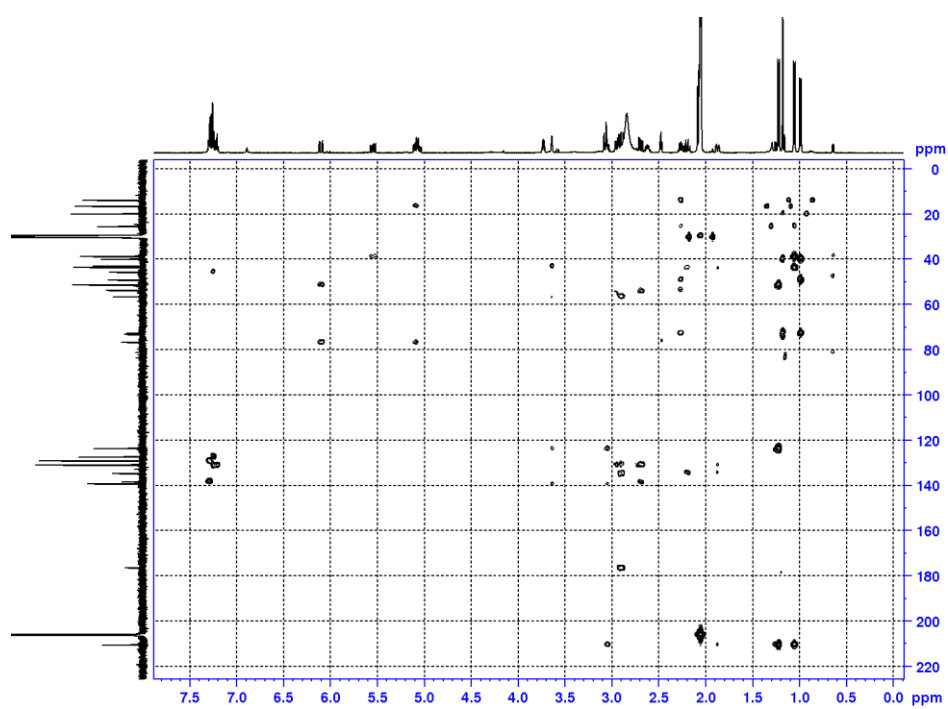

**Figure S65.** HMBC spectrum of compound **11** in Acetone- $d_6$

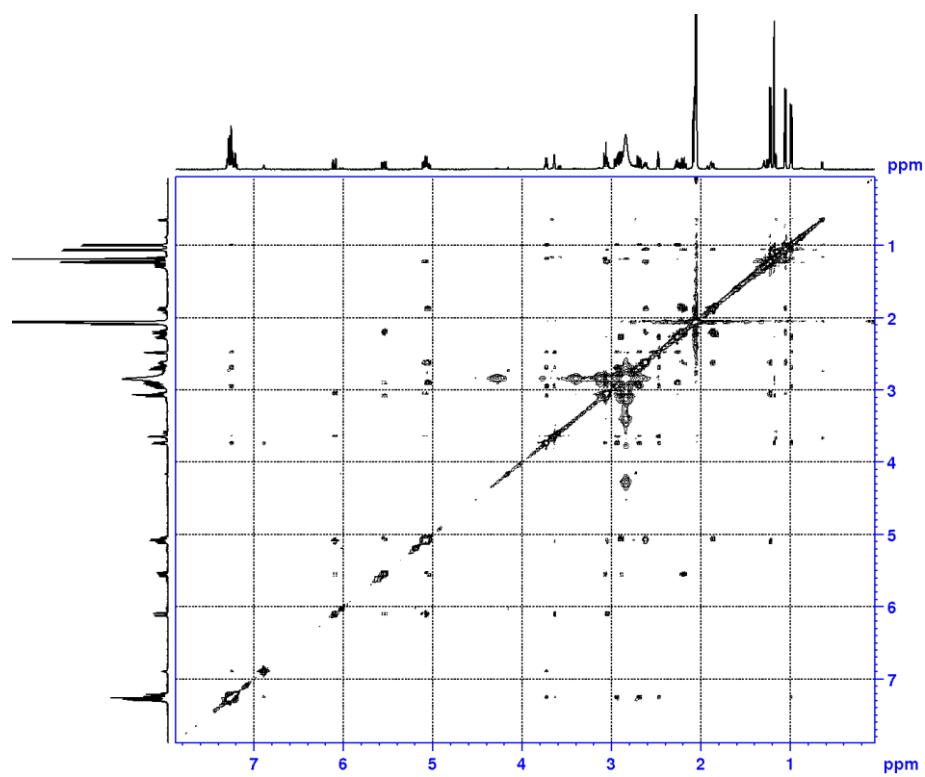

**Figure S66.** NOESY spectrum of compound **11** in Acetone- $d_6$

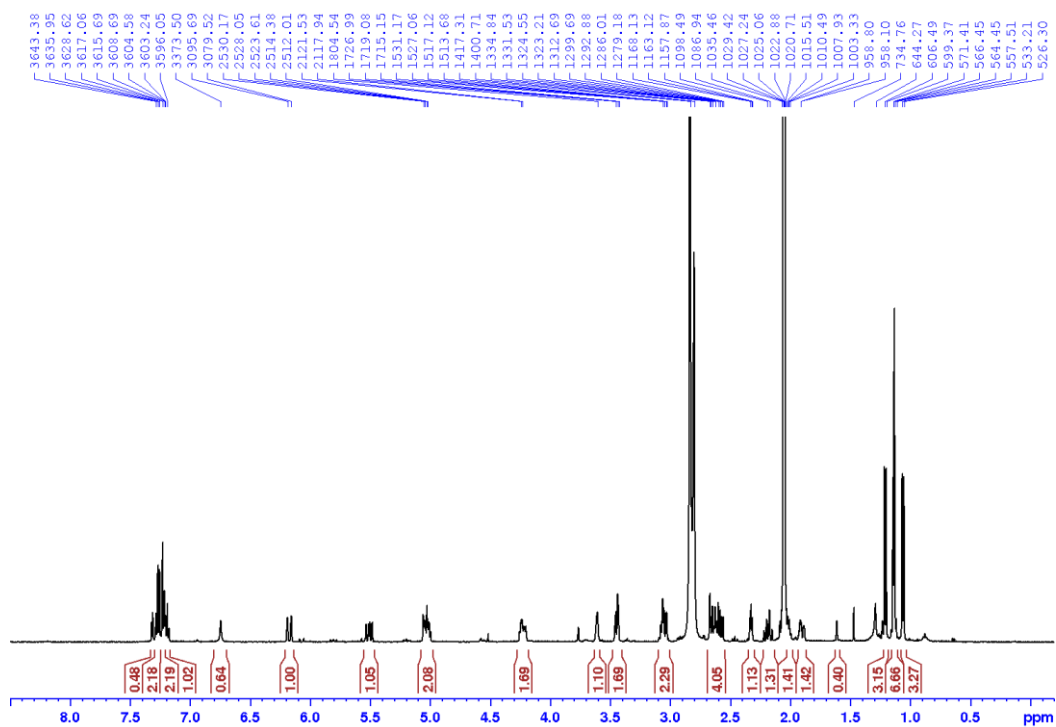

Figure S67.  $^1\text{H}$  NMR spectrum of compound **12** in Acetone- $d_6$

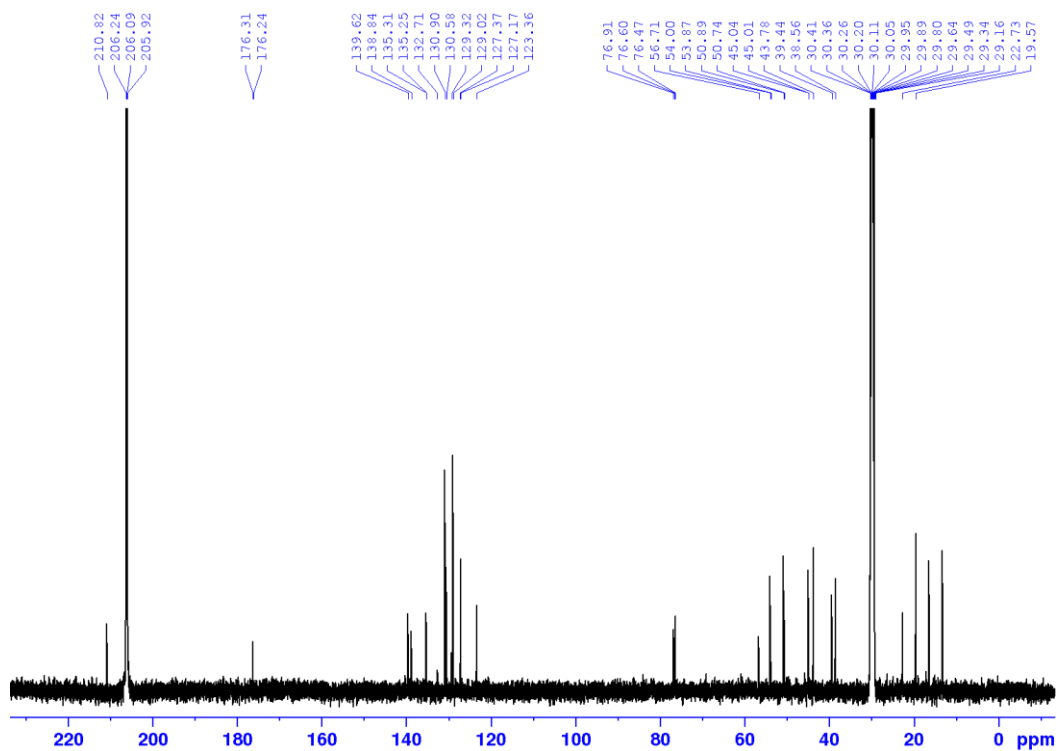

Figure S68.  $^{13}\text{C}$  NMR spectrum of compound **12** in Acetone- $d_6$

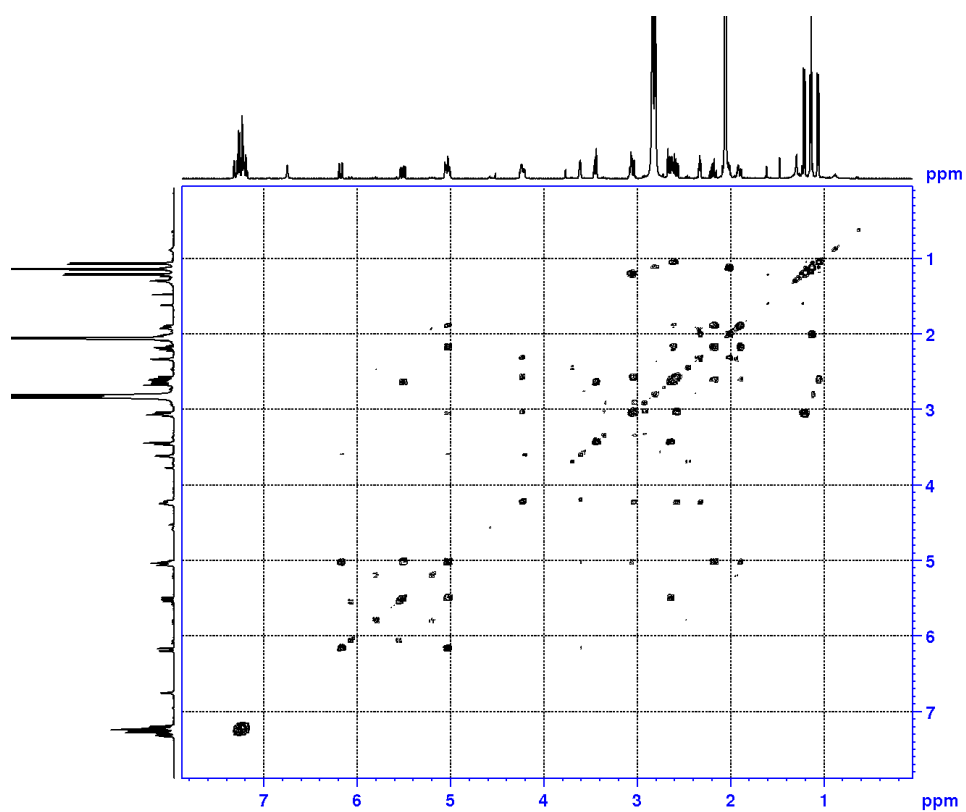

**Figure S69.** COSY spectrum of compound **12** in Acetone- $d_6$

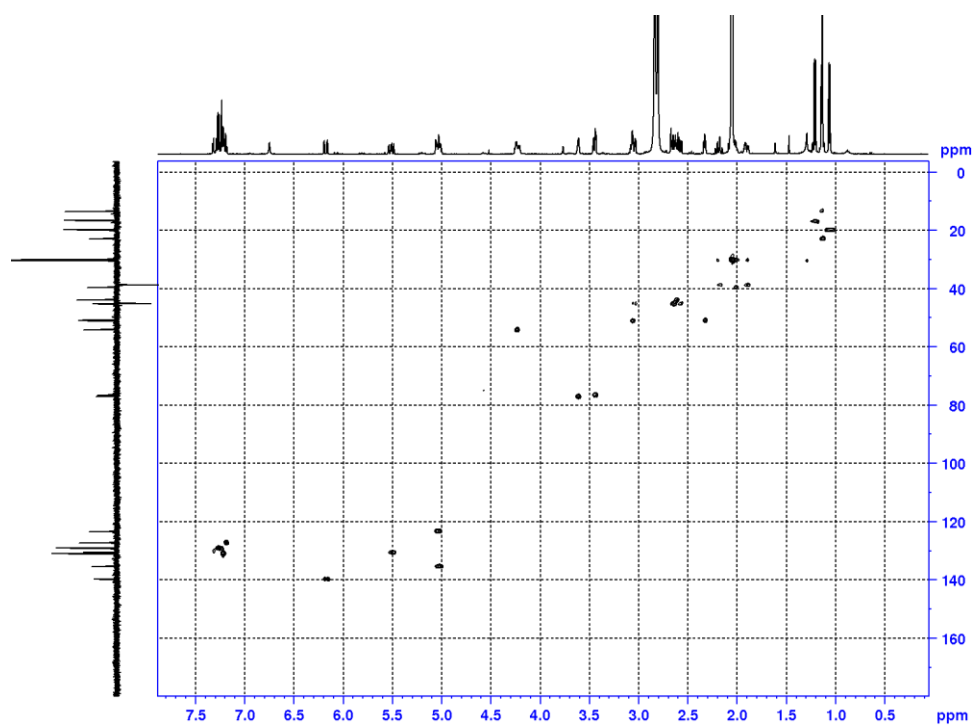

**Figure S70.** HSQC spectrum of compound **12** in Acetone- $d_6$



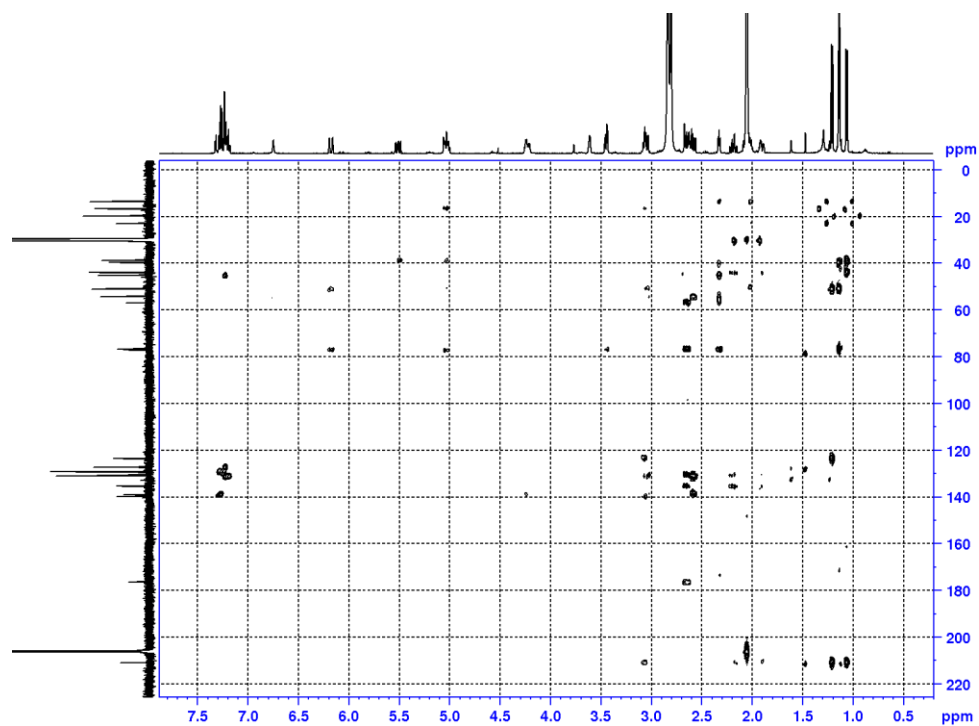

**Figure S71.** HMBC spectrum of compound **12** in Acetone- $d_6$

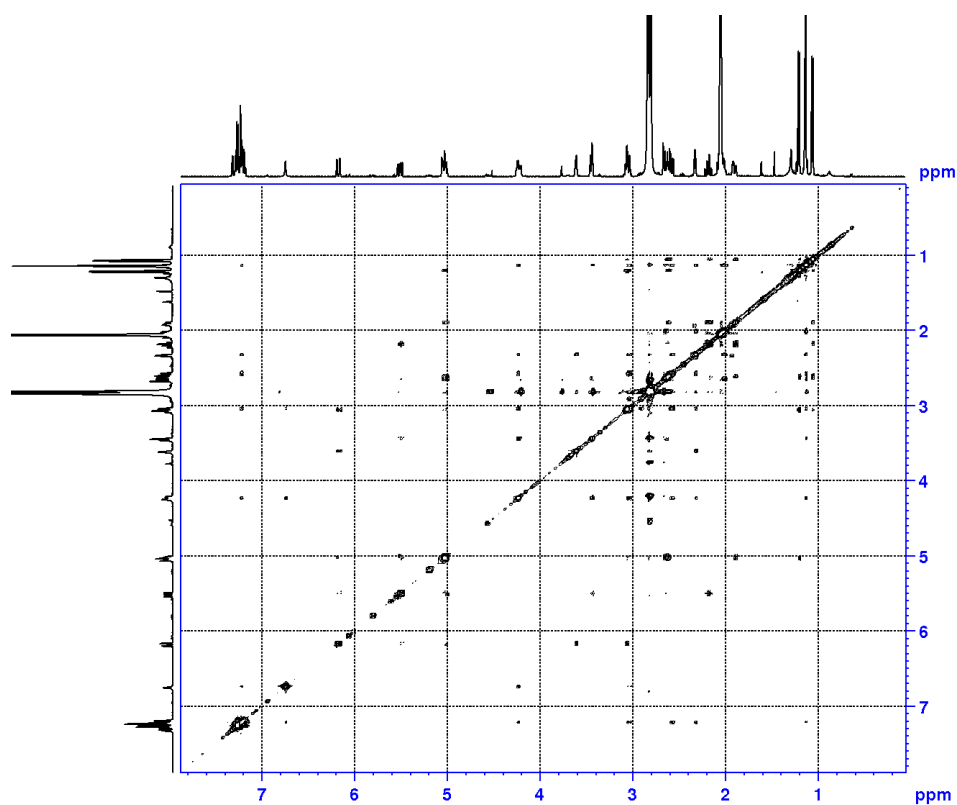

**Figure S72.** NOESY spectrum of compound **12** in Acetone- $d_6$

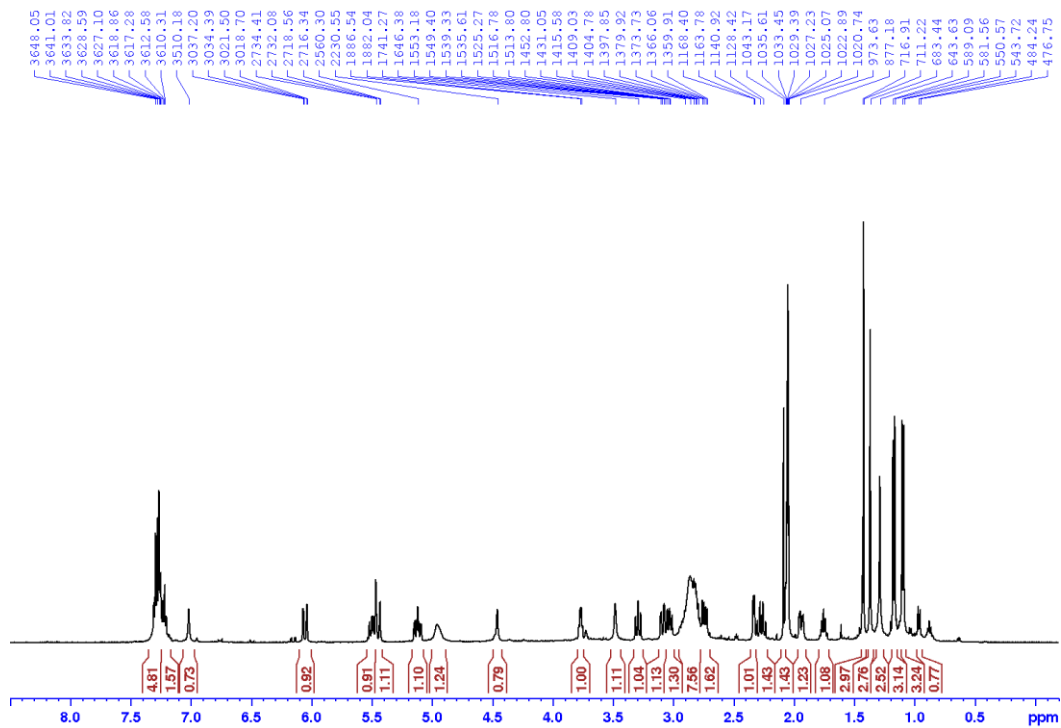

**Figure S73.**  $^1\text{H}$  NMR spectrum of compound **13** in Acetone- $d_6$

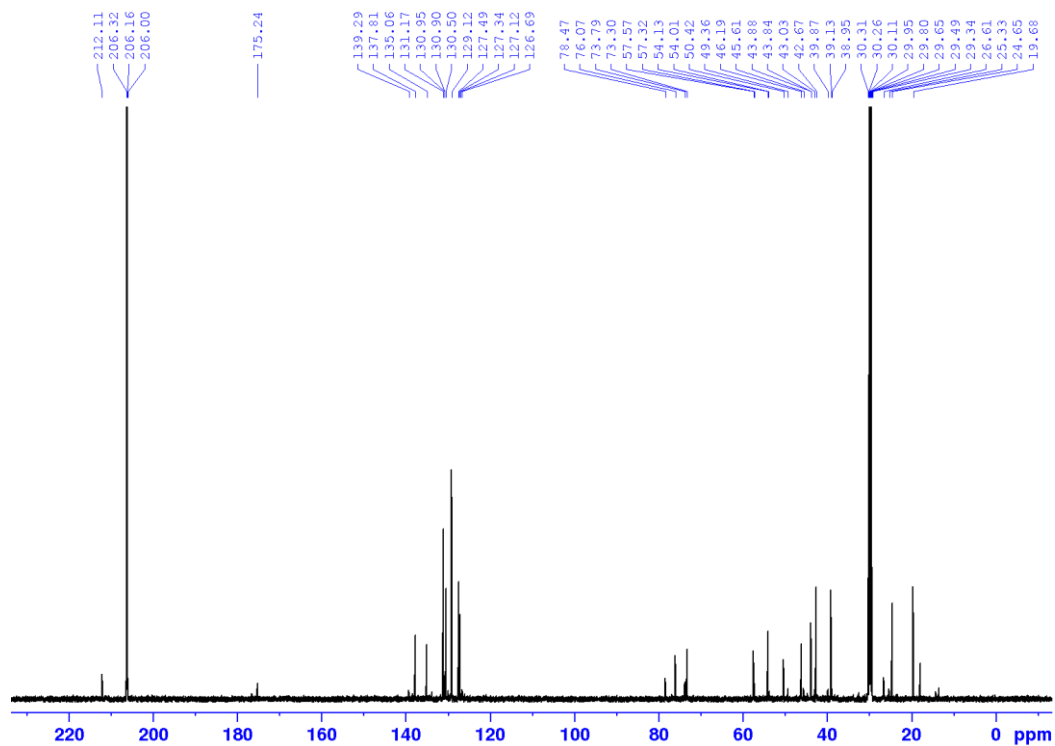

**Figure S74.**  $^{13}\text{C}$  NMR spectrum of compound **13** in Acetone- $d_6$

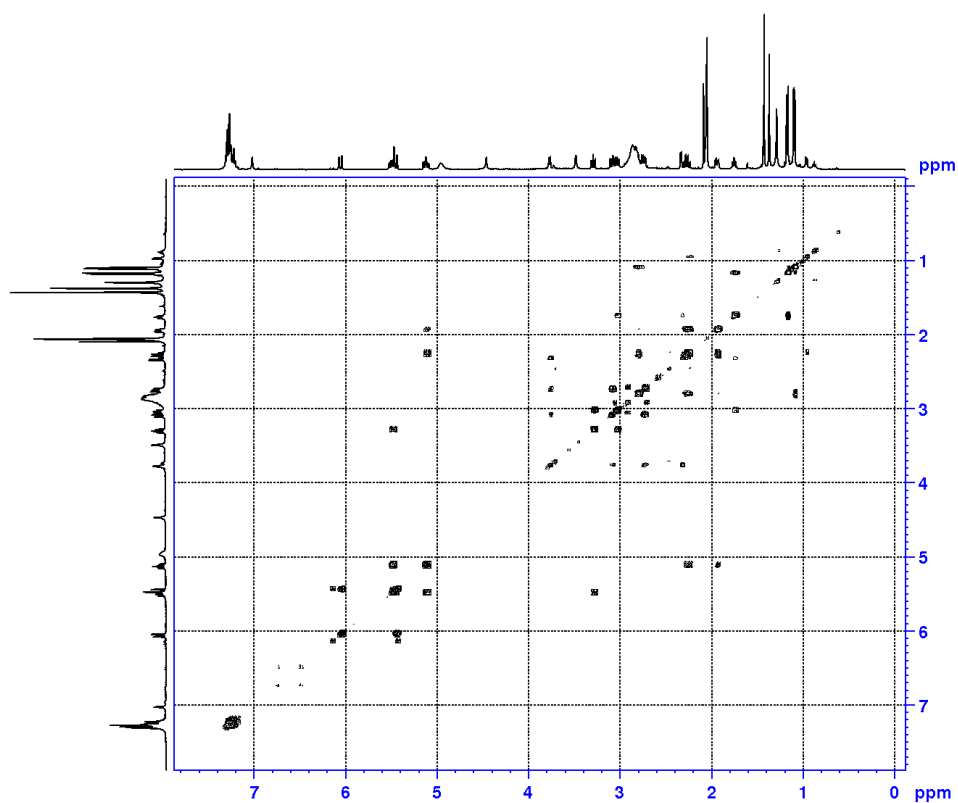

**Figure S75.** COSY spectrum of compound **13** in Acetone- $d_6$

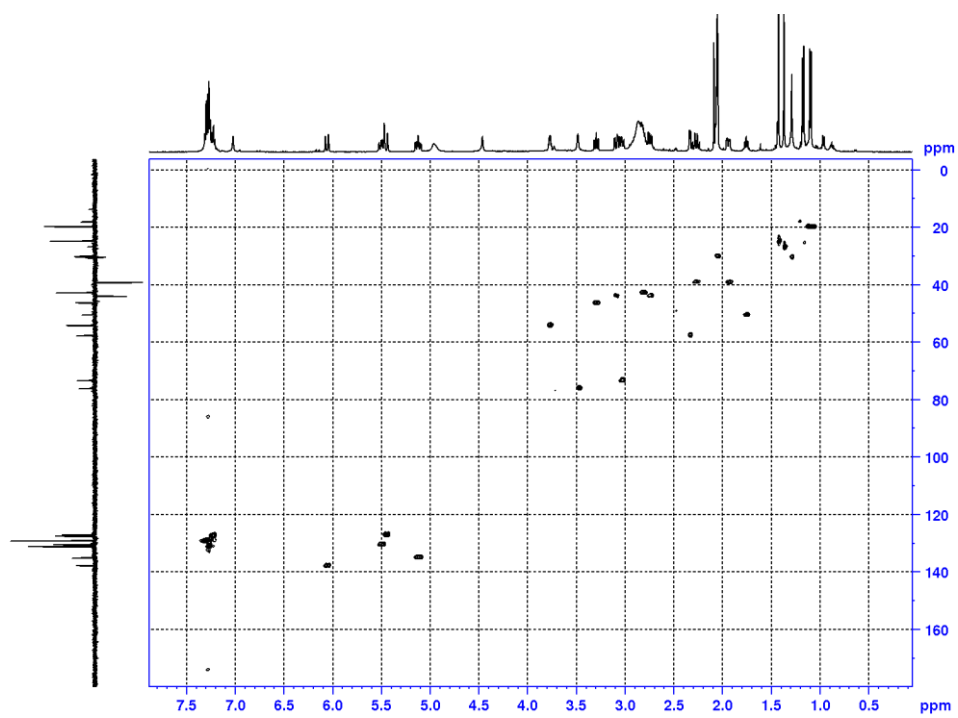

**Figure S76.** HSQC spectrum of compound **13** in Acetone- $d_6$

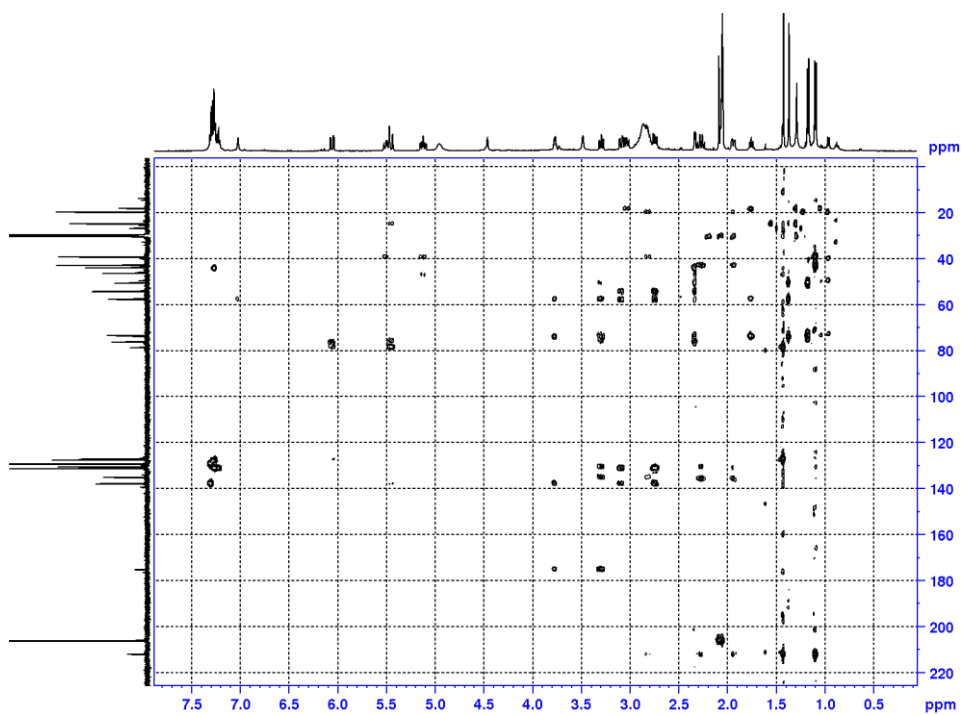

**Figure S77.** HMBC spectrum of compound **13** in Acetone-*d*<sub>6</sub>

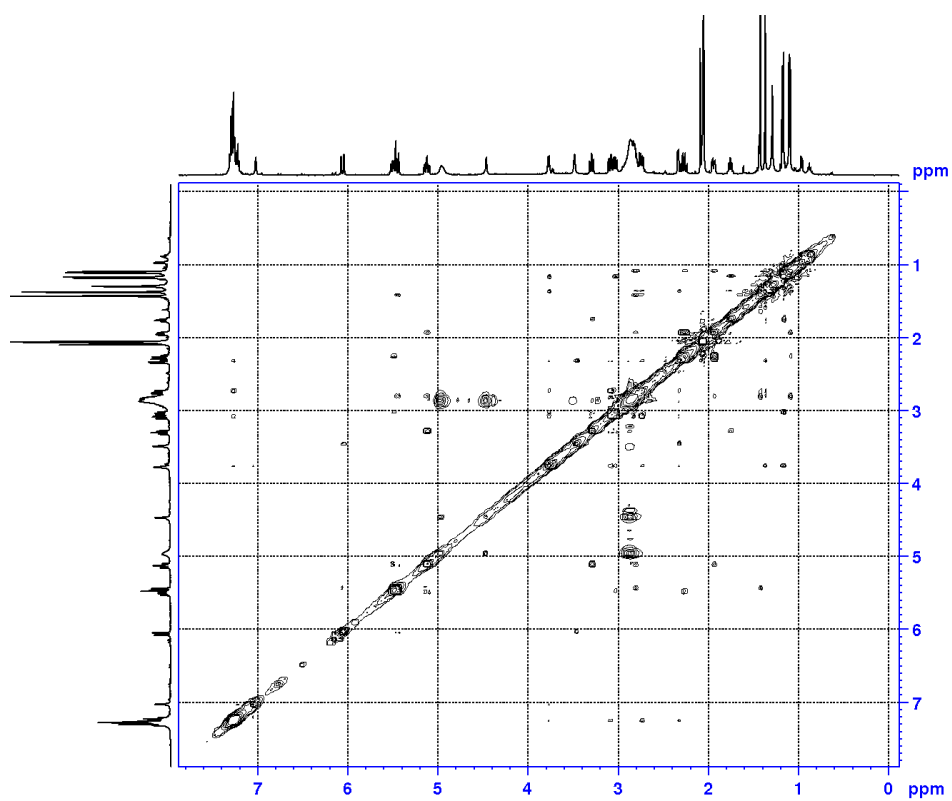

**Figure S78.** NOESY spectrum of compound **13** in Acetone-*d*<sub>6</sub>

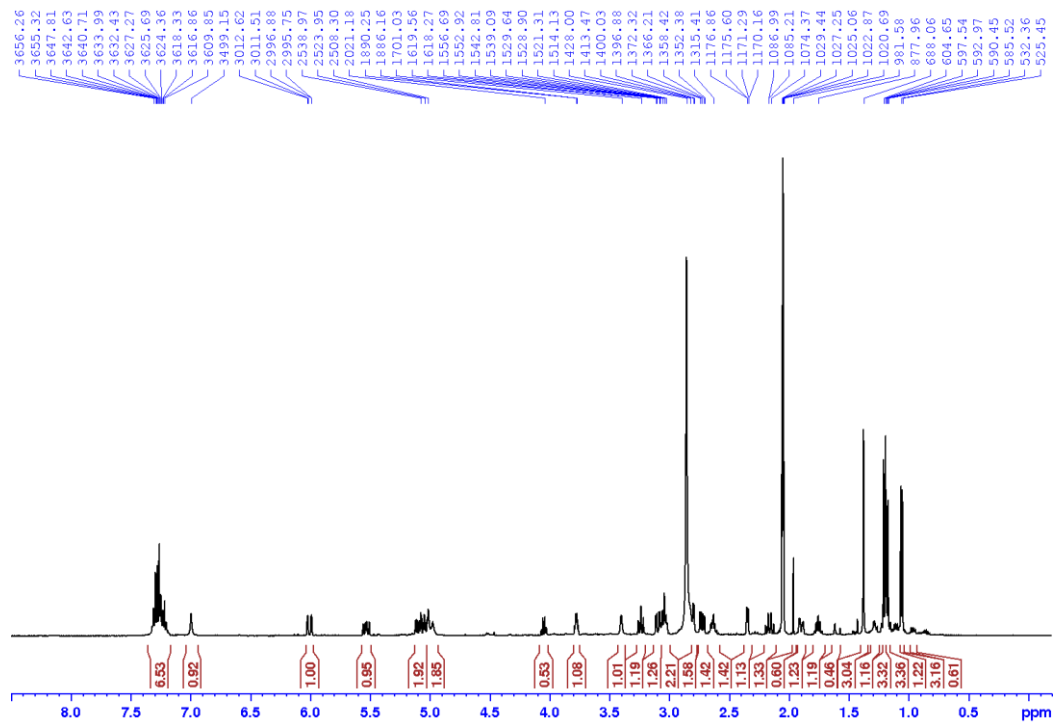

Figure S79.  $^1\text{H}$  NMR spectrum of compound **14** in Acetone- $d_6$

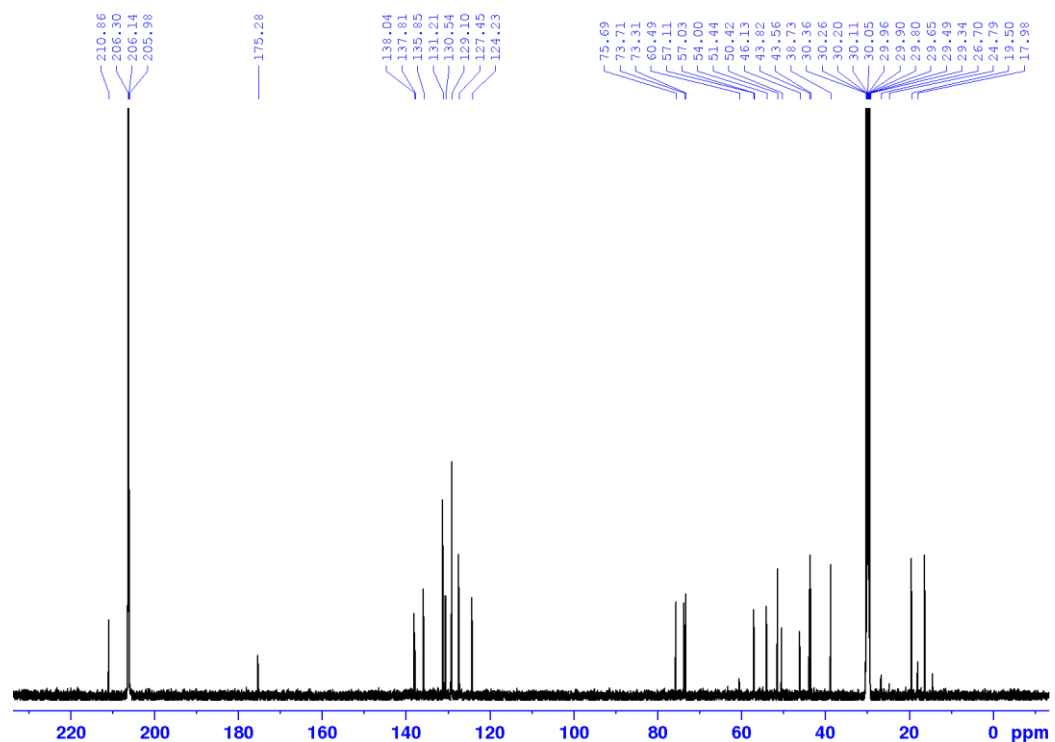

Figure S80.  $^{13}\text{C}$  NMR spectrum of compound **14** in Acetone- $d_6$

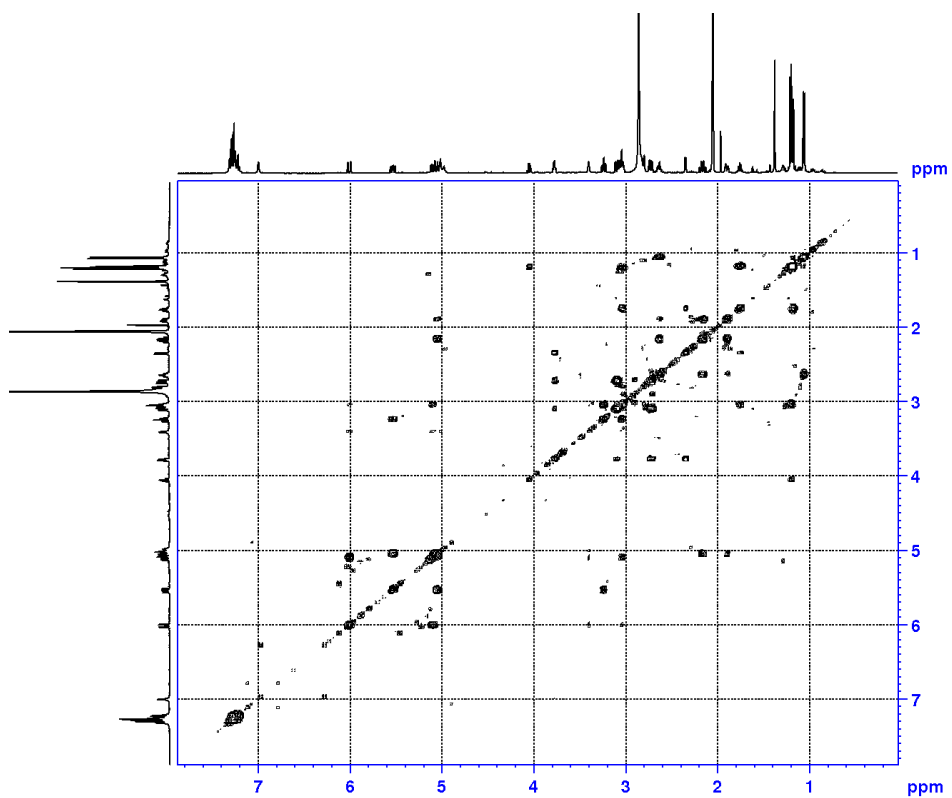

Figure S81. COSY spectrum of compound **14** in Acetone- $d_6$

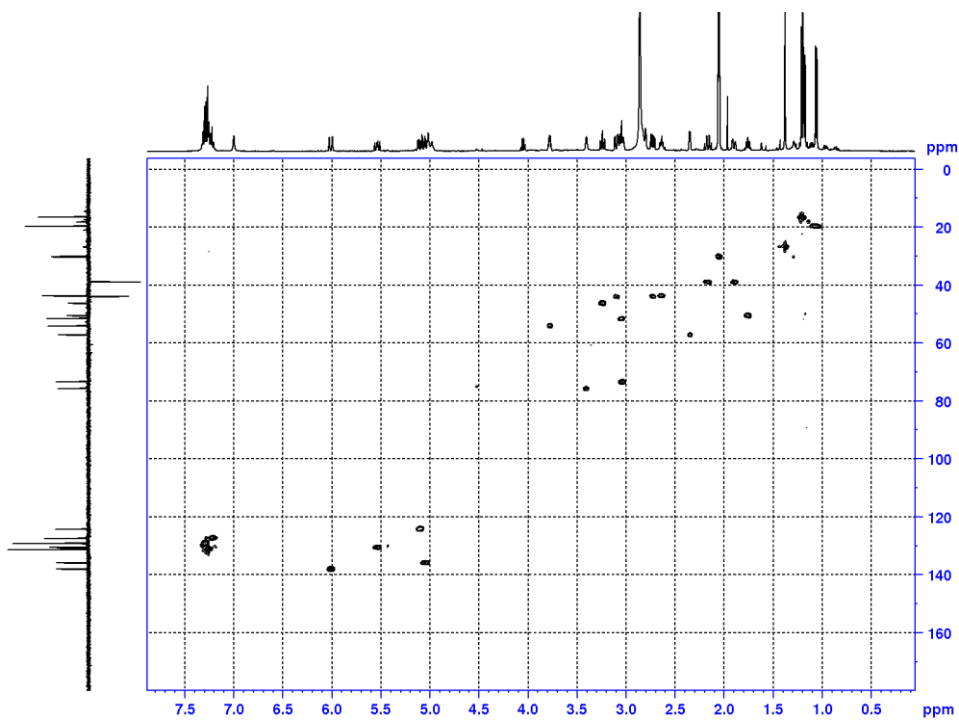

Figure S82. HSQC spectrum of compound **14** in Acetone- $d_6$

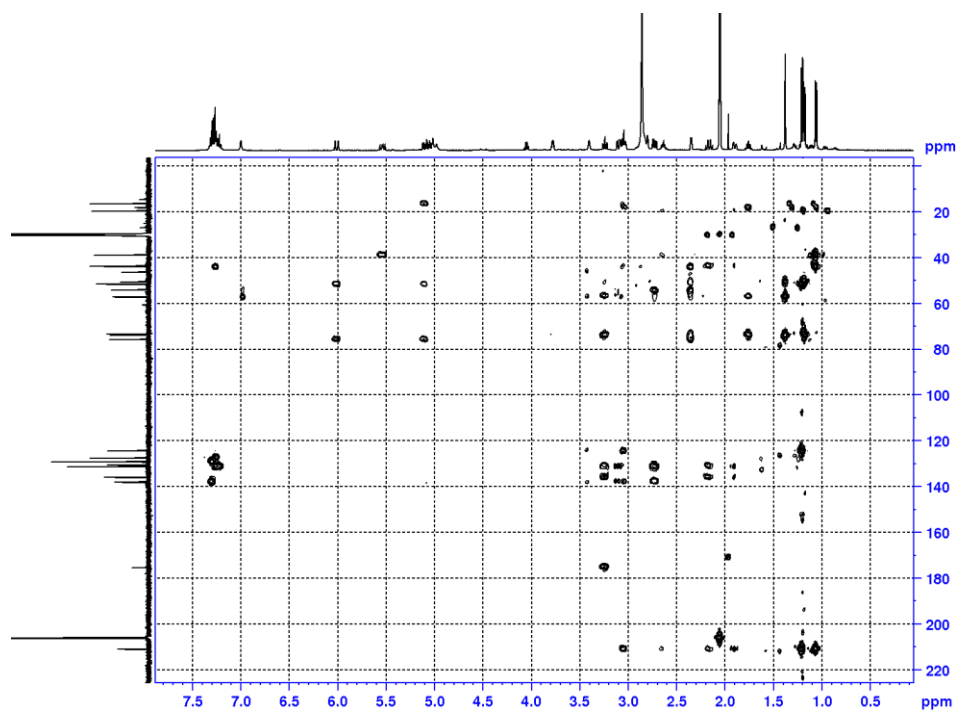

**Figure S83.** HMBC spectrum of compound **14** in Acetone- $d_6$

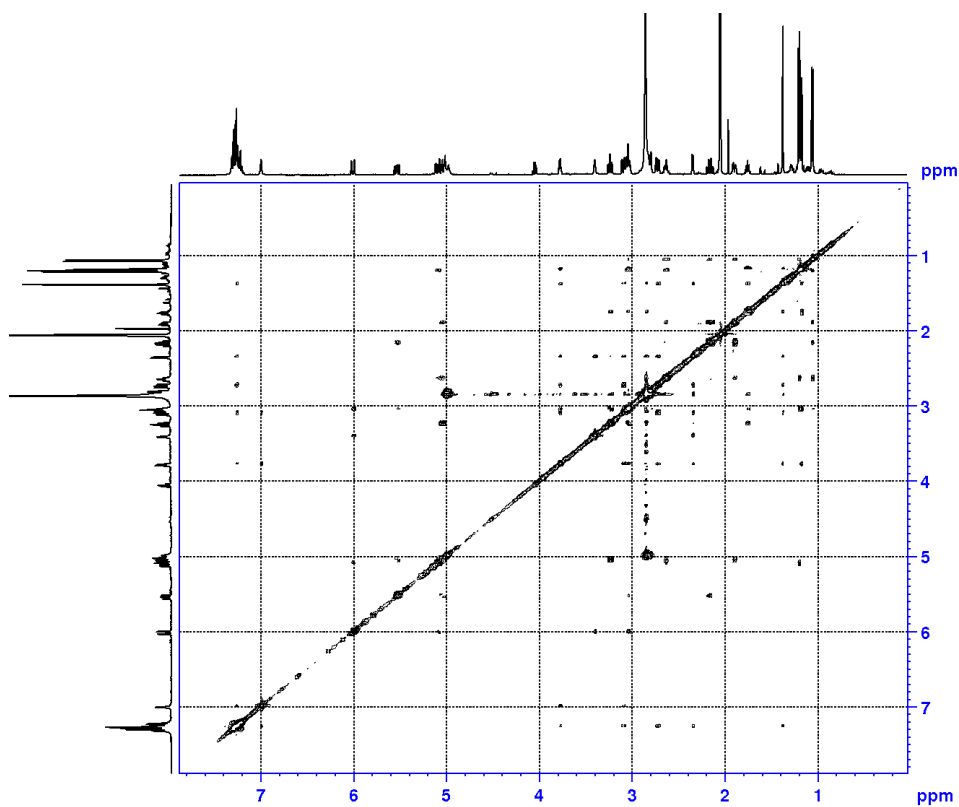

**Figure S84.** NOESY spectrum of compound **14** in Acetone- $d_6$

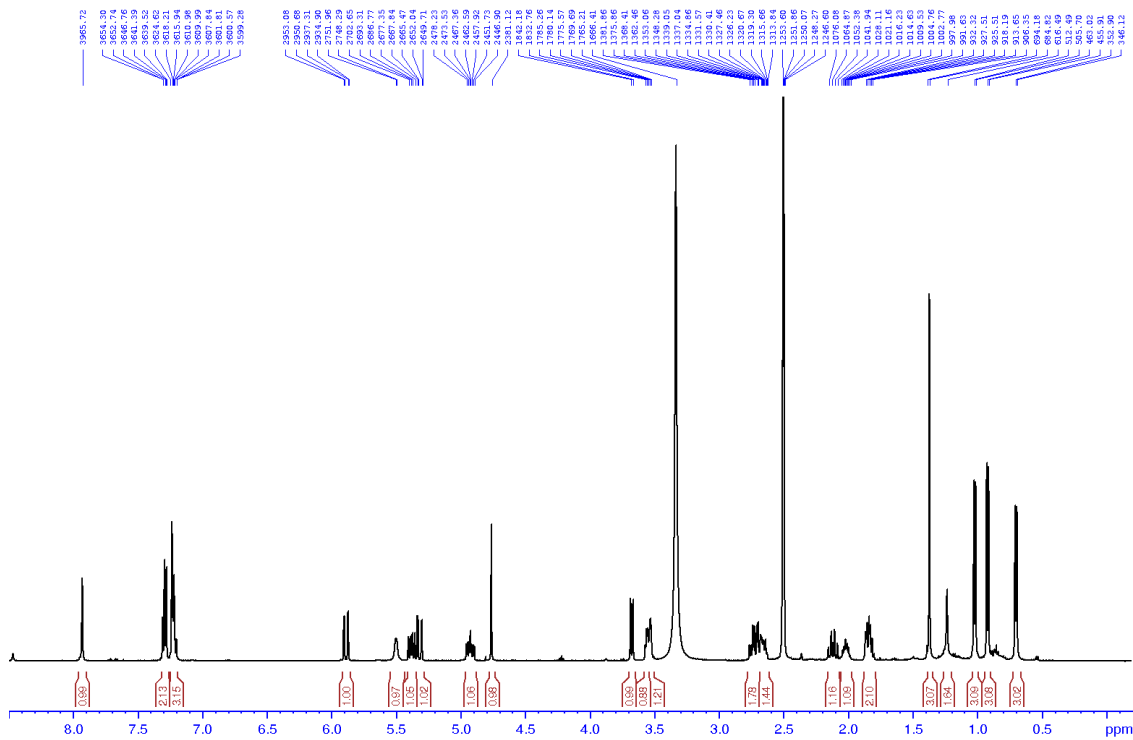

Figure S85.  $^1\text{H}$  NMR spectrum of compound **15** in  $\text{DMSO-}d_6$

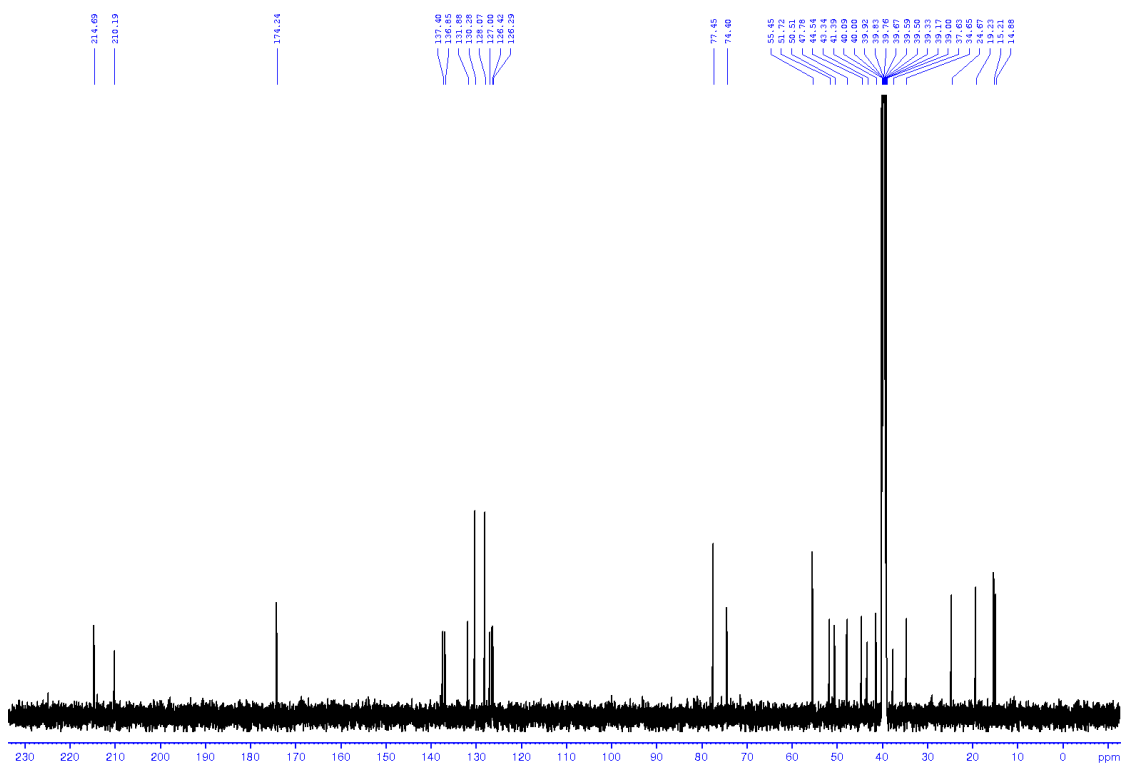

Figure S86.  $^{13}\text{C}$  NMR spectrum of compound **15** in  $\text{DMSO-}d_6$











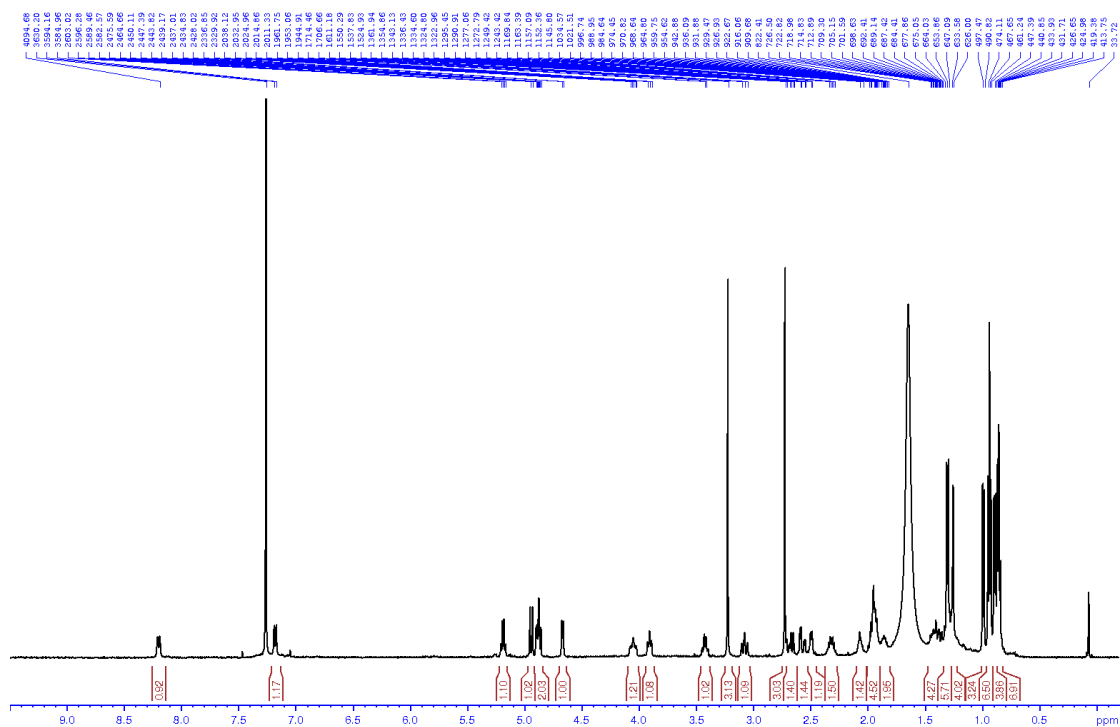

Figure S95.  $^1\text{H}$  NMR spectrum of destruxins B in  $\text{CDCl}_3$

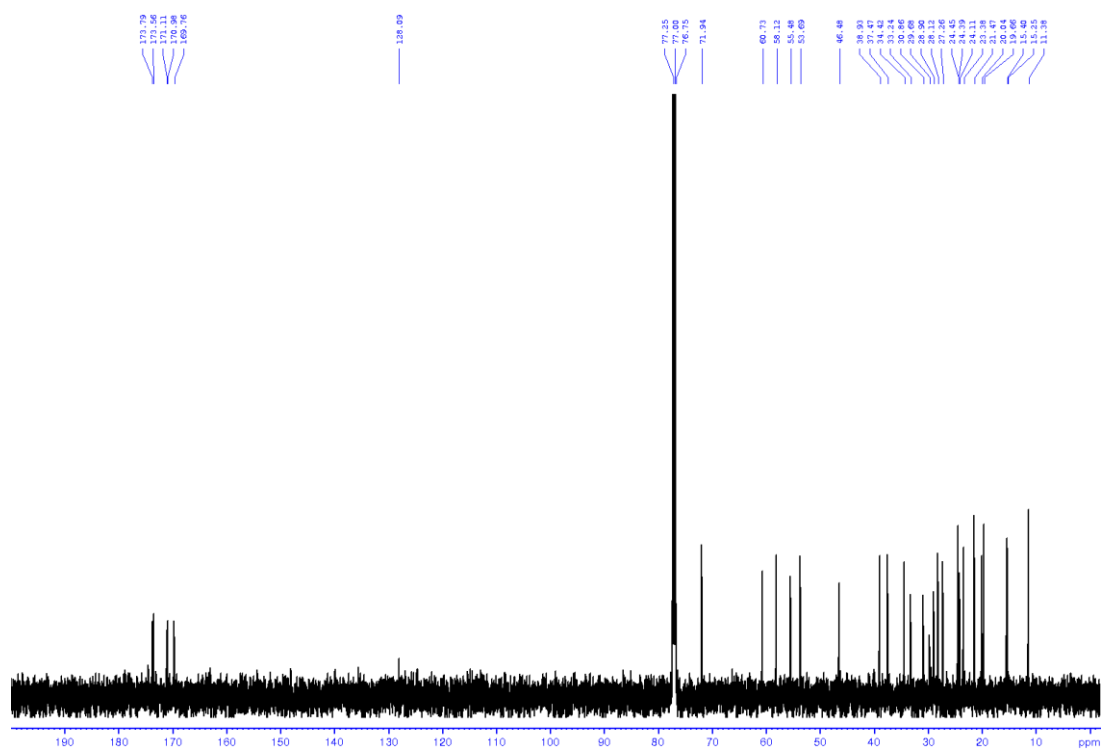

Figure S96.  $^{13}\text{C}$  NMR spectrum of destruxins B in  $\text{CDCl}_3$

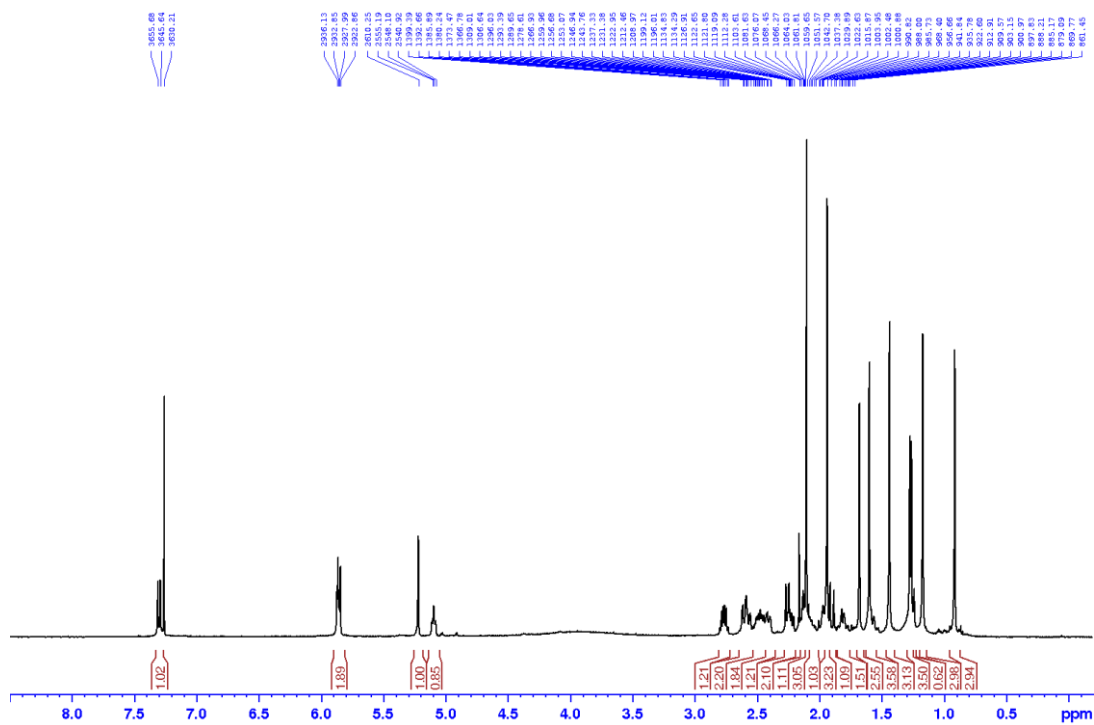

Figure S97. <sup>1</sup>H NMR spectrum of helvolic acid in CDCl<sub>3</sub>

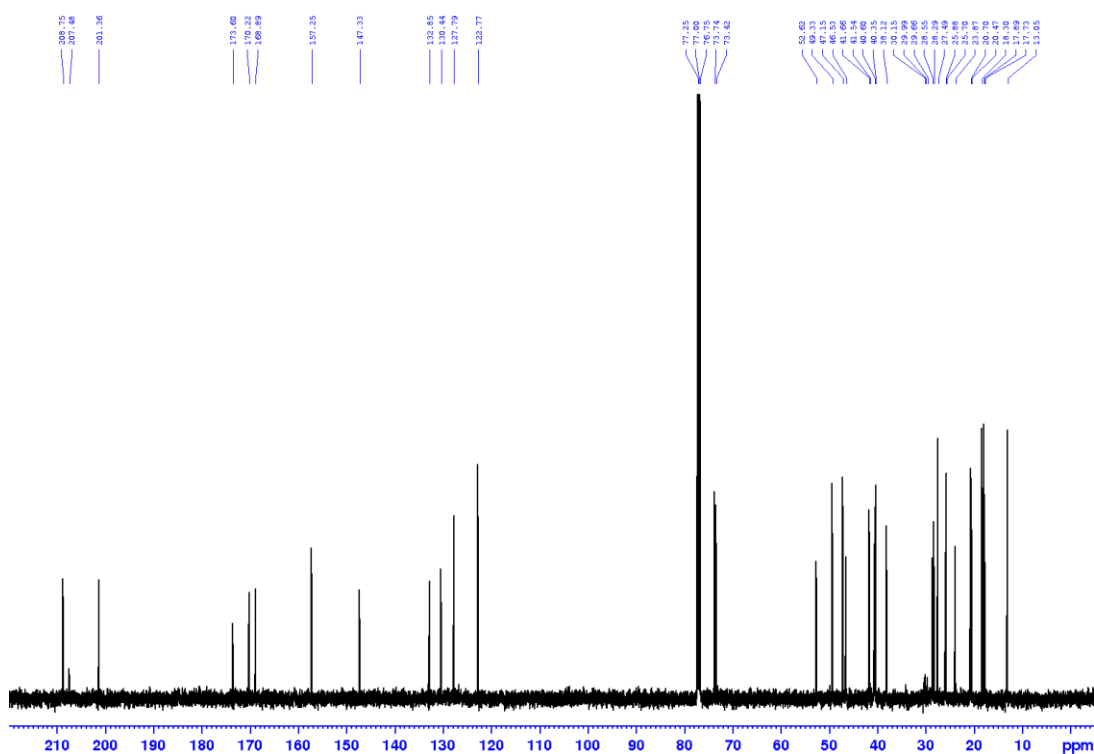

Figure S98. <sup>13</sup>C NMR spectrum of helvolic acid in CDCl<sub>3</sub>

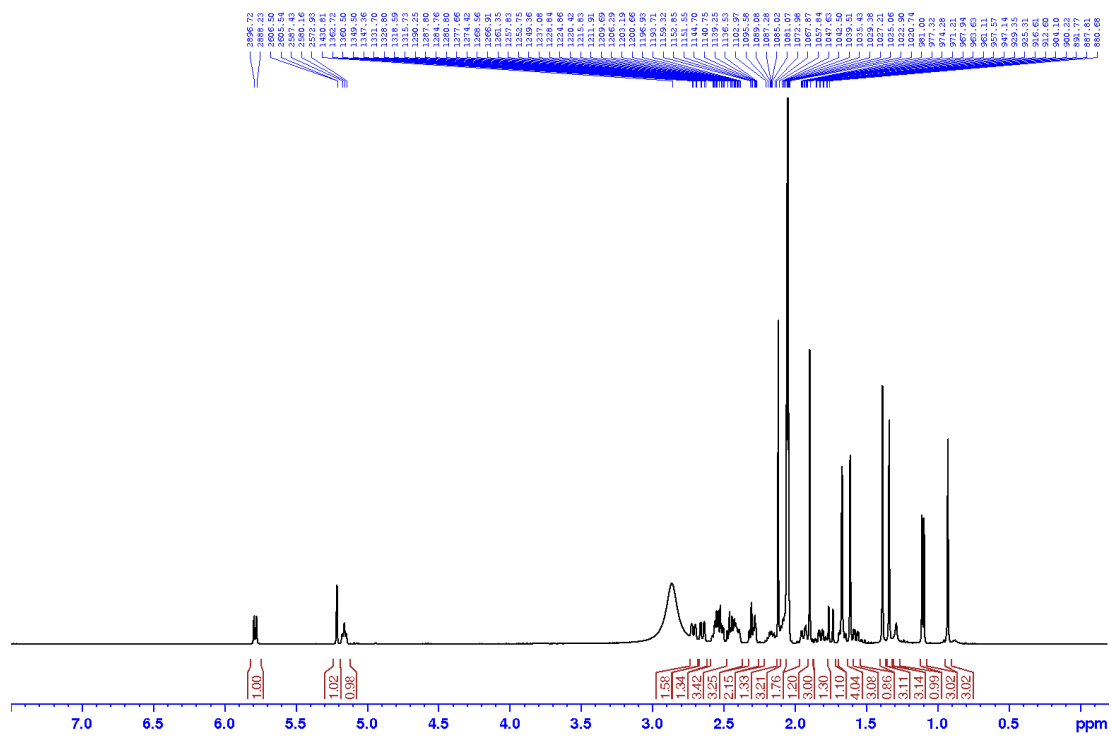

Figure S99.  $^1\text{H}$  NMR spectrum of 1,2-dihydrohevoic acid in Acetone- $d_6$

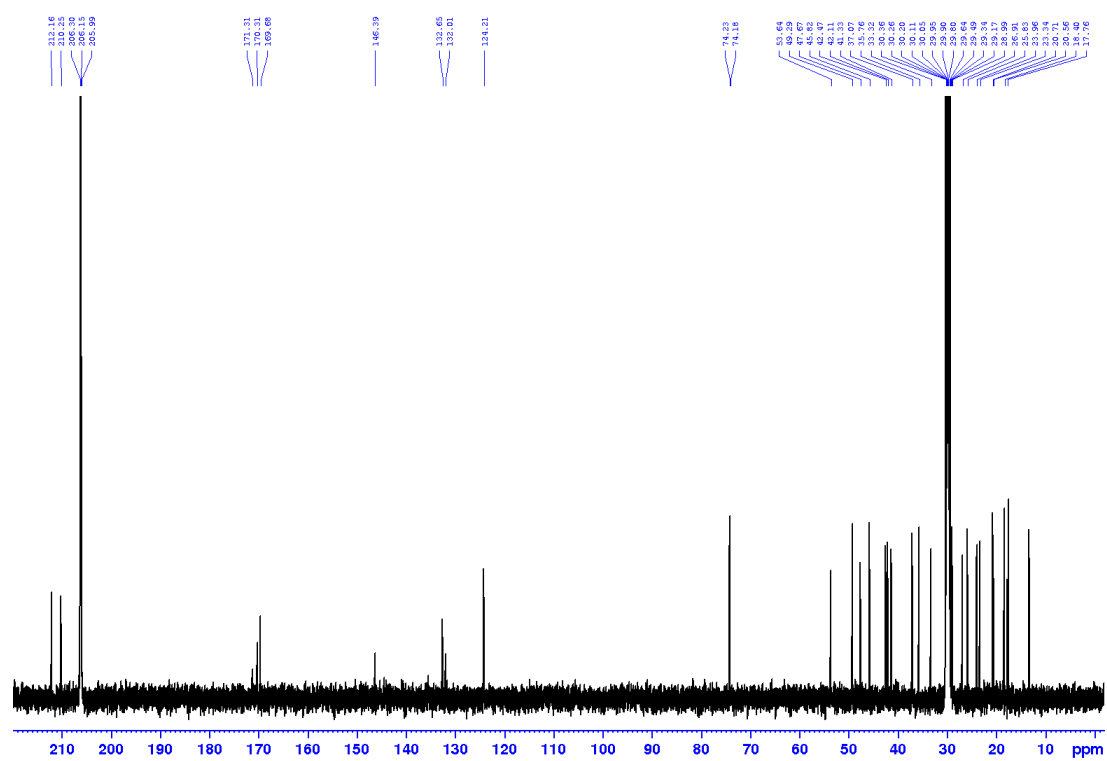

Figure S100.  $^{13}\text{C}$  NMR spectrum of 1,2-dihydrohevoic acid in Acetone- $d_6$

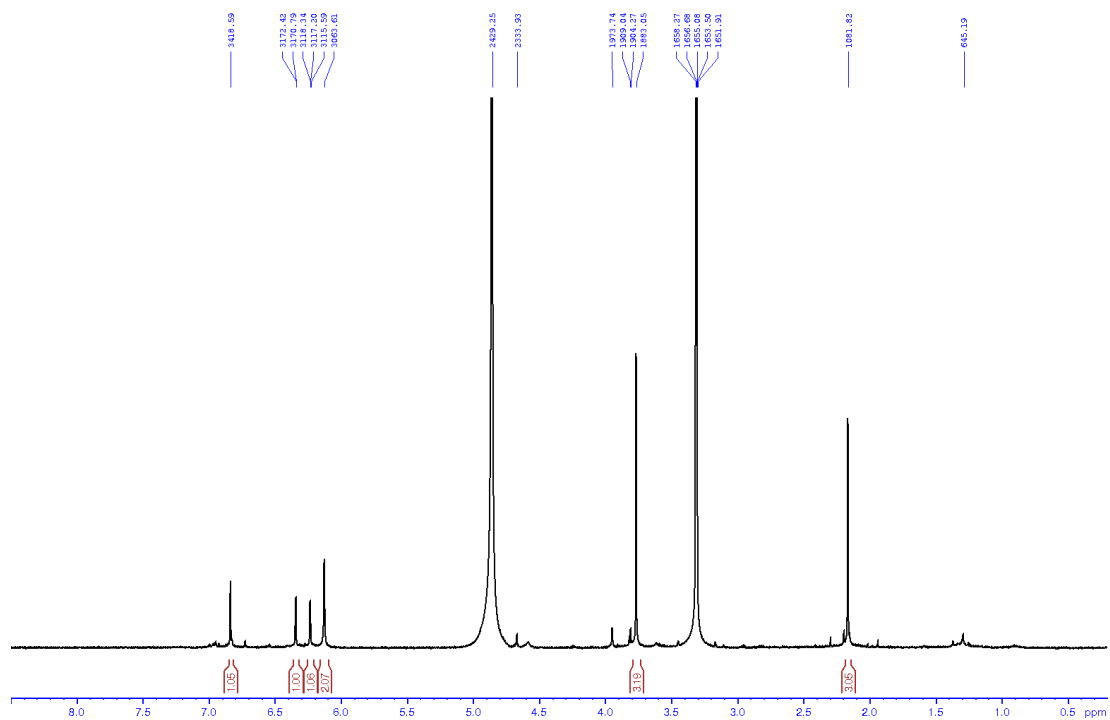

**Figure S101.**  $^1\text{H}$  NMR spectrum of meromuside I in  $\text{MeOH-}d_4$

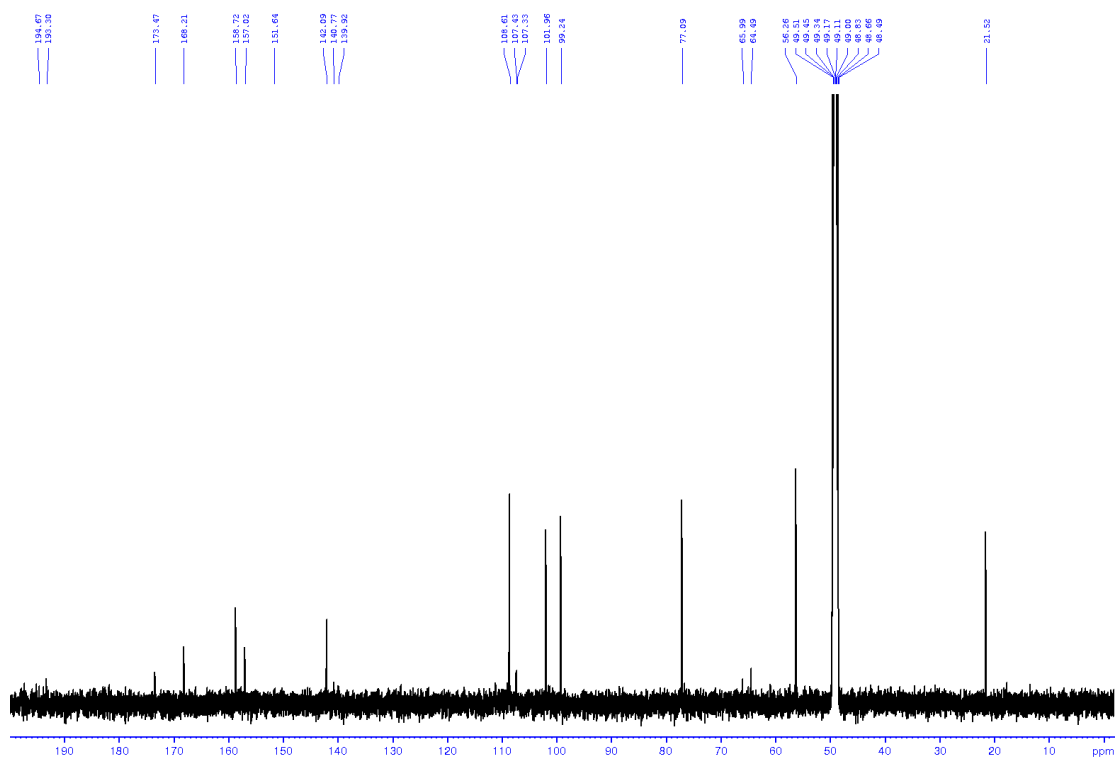

**Figure S102.**  $^{13}\text{C}$  NMR spectrum of meromuside I in  $\text{MeOH-}d_4$



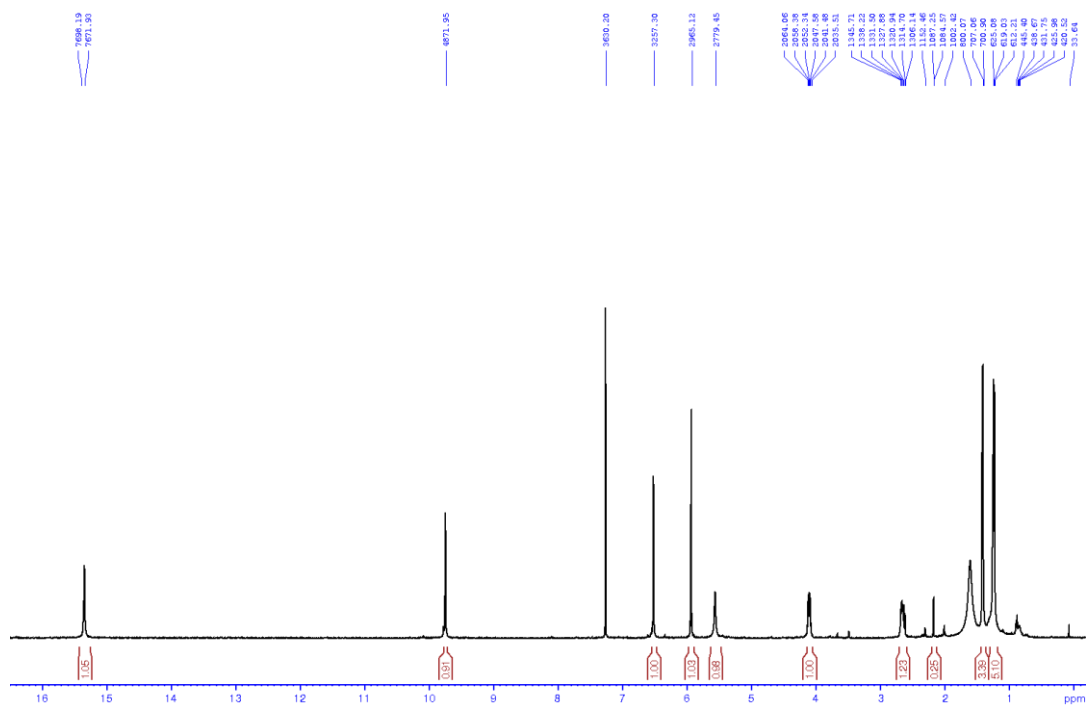

Figure S103.  $^1\text{H}$  NMR spectrum of ustilaginoindins D in  $\text{CDCl}_3$

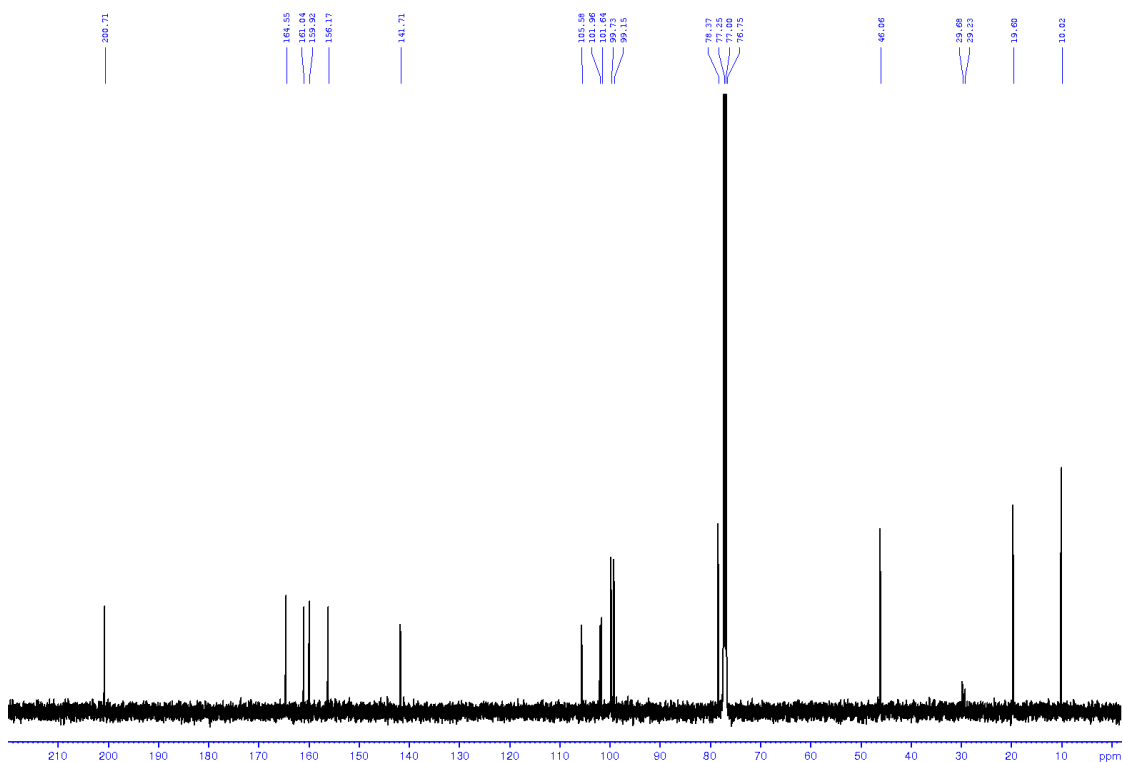

Figure S104.  $^{13}\text{C}$  NMR spectrum of ustilaginoindins D in  $\text{CDCl}_3$

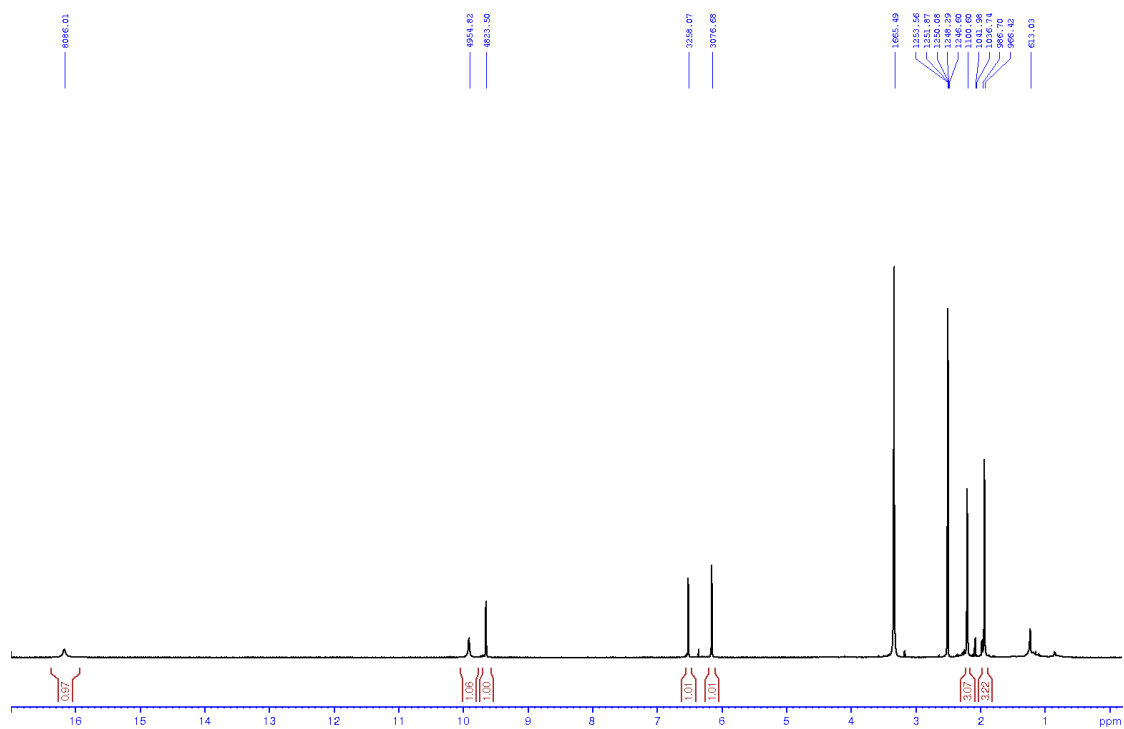

**Figure S105.**  $^1\text{H}$  NMR spectrum of ustilaginoindins K in  $\text{DMSO-}d_6$

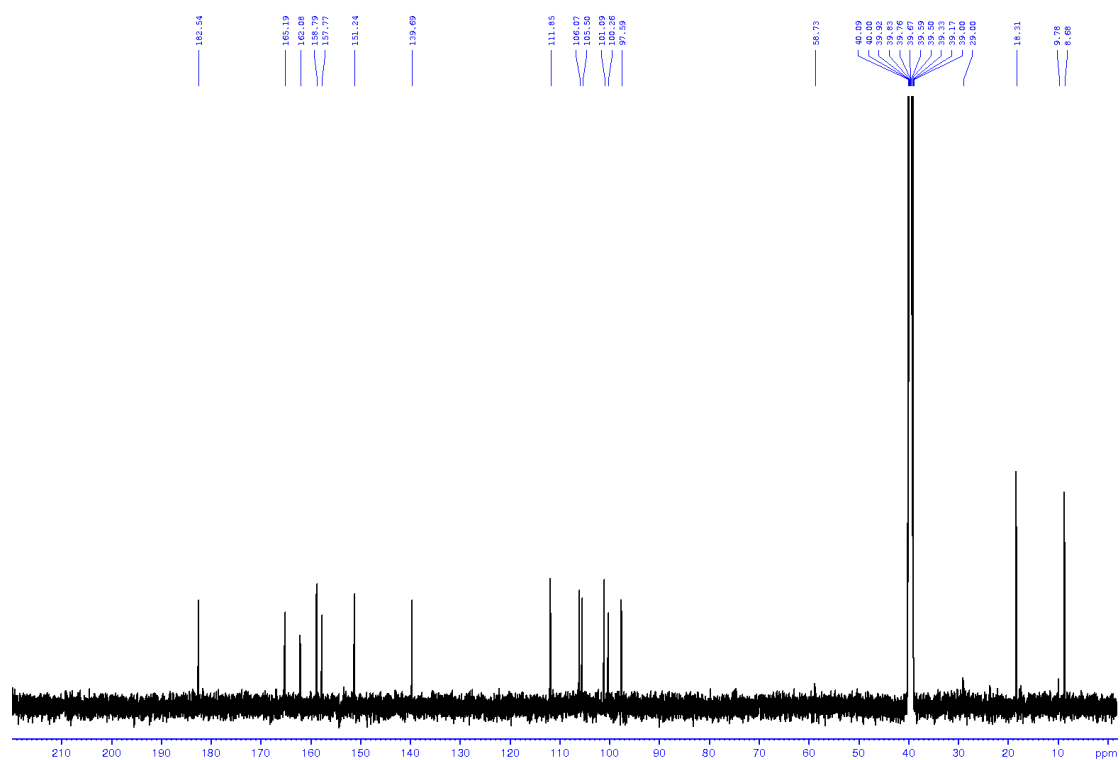

**Figure S106.**  $^{13}\text{C}$  NMR spectrum of ustilaginoindins K in  $\text{DMSO-}d_6$

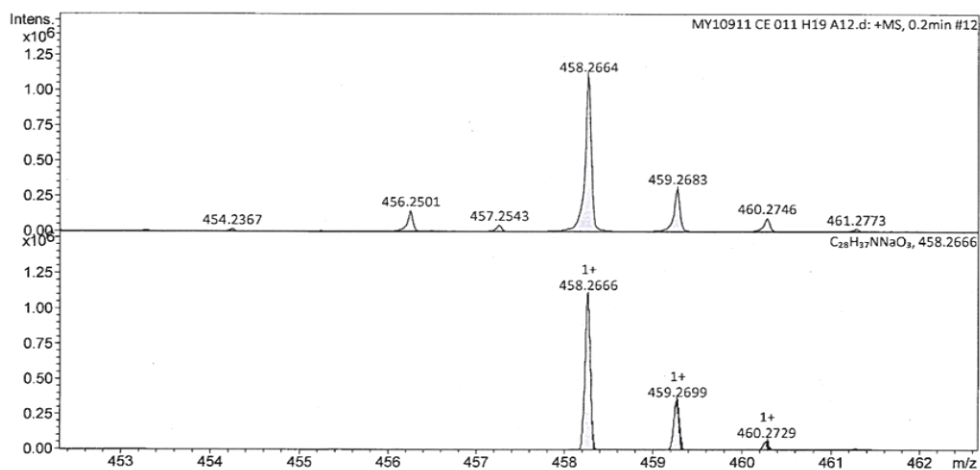

**Figure S107.** HRESIMS spectrum of compound **1**

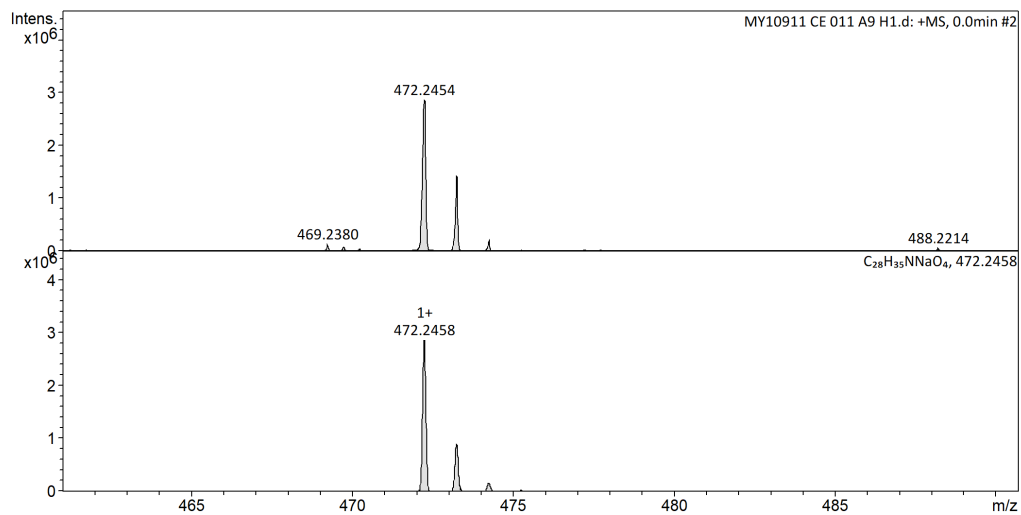

**Figure S108.** HRESIMS spectrum of compound **2**

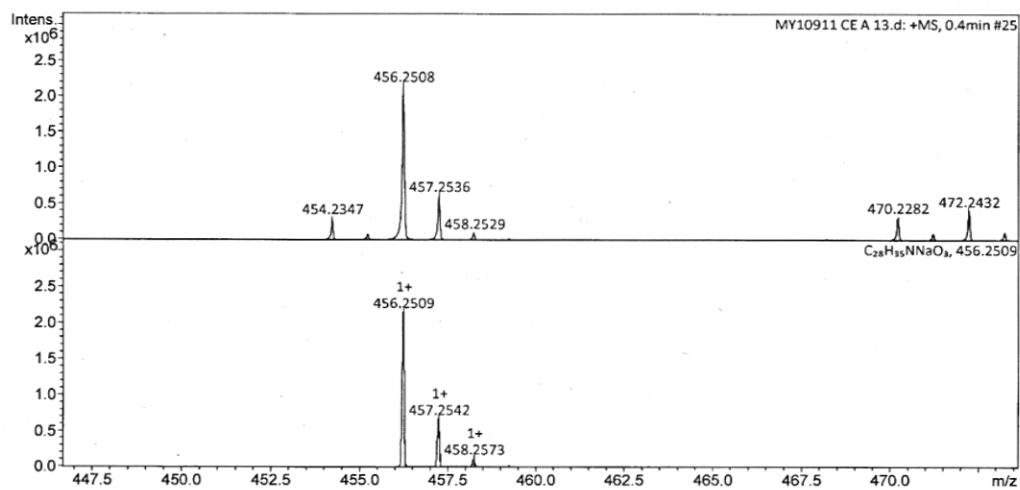

**Figure S109.** HRESIMS spectrum of compound 3

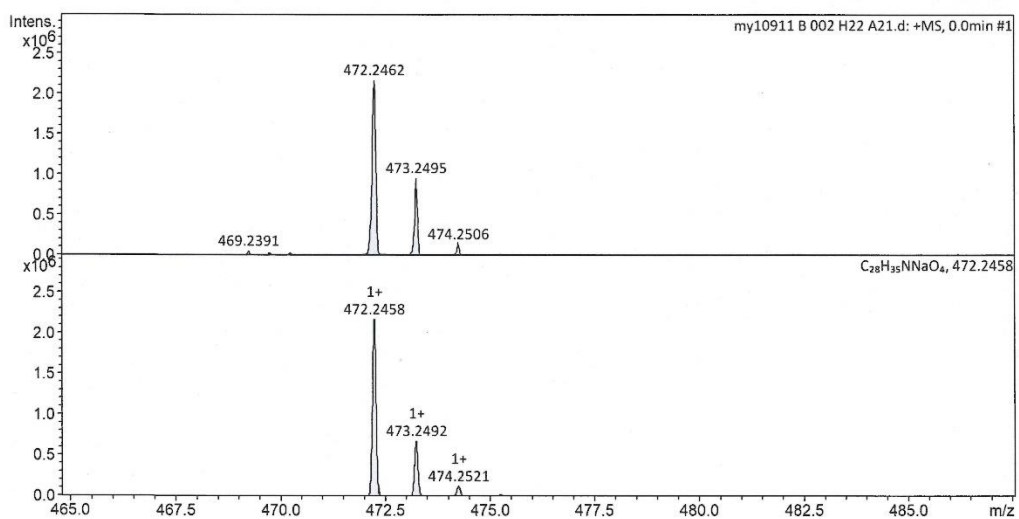

**Figure S110.** HRESIMS spectrum of compound 4

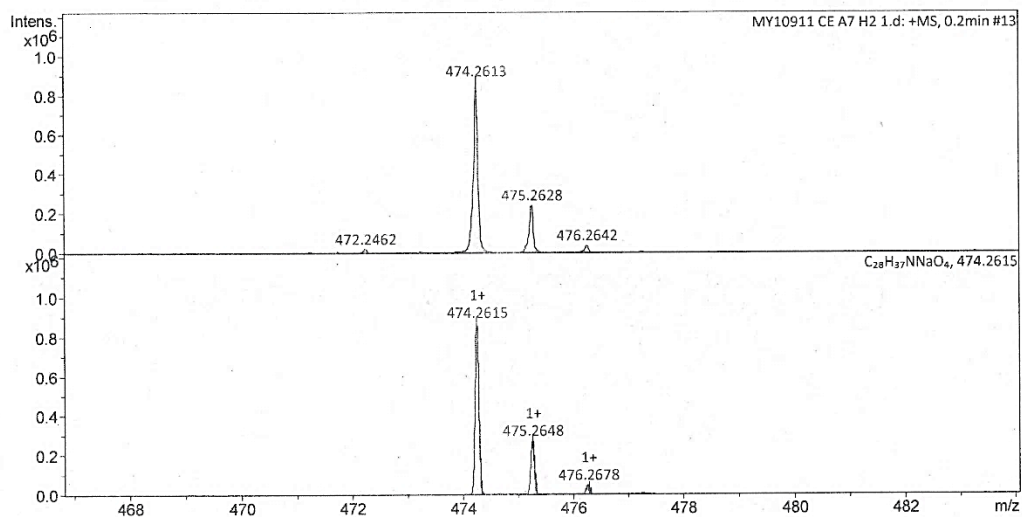

**Figure S111.** HRESIMS spectrum of compound 5

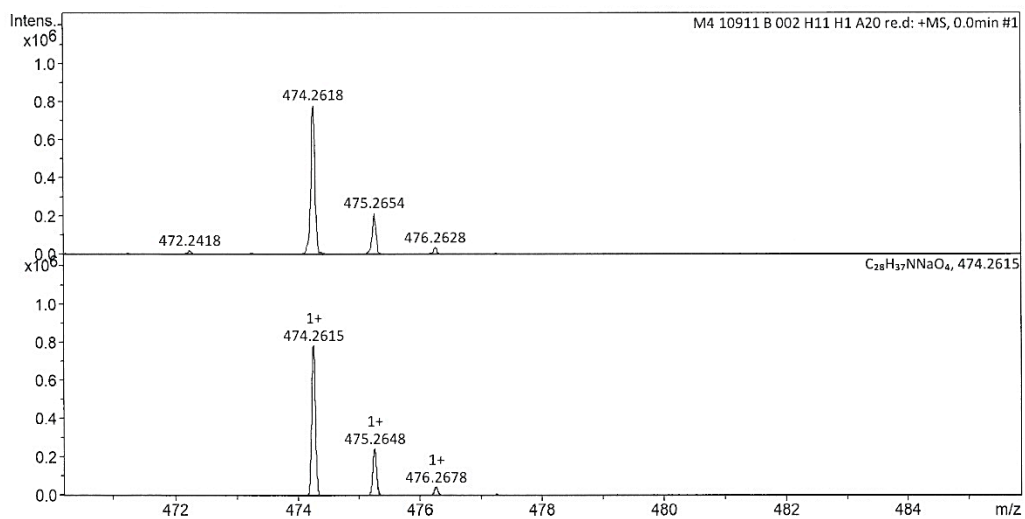

**Figure S112.** HRESIMS spectrum of compound 6

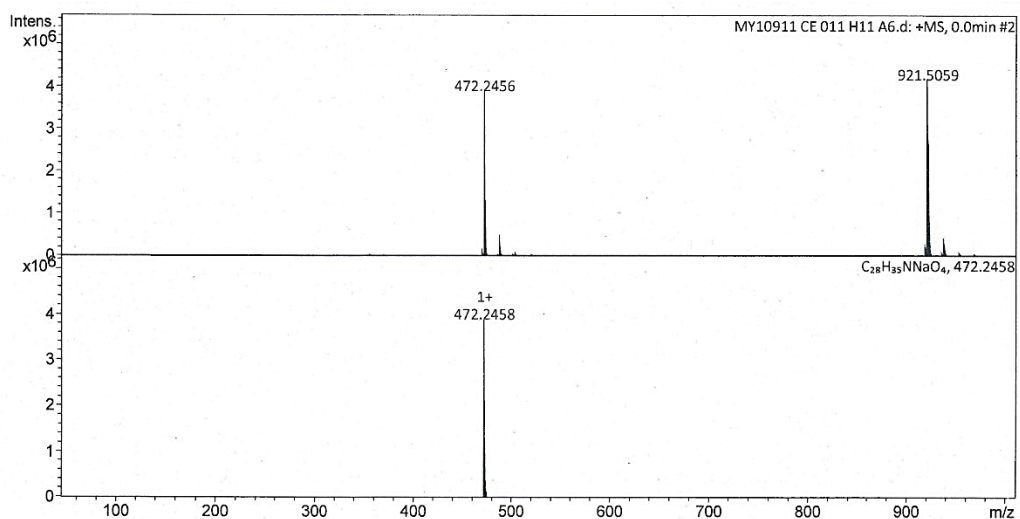

**Figure S113.** HRESIMS spectrum of compound **7**

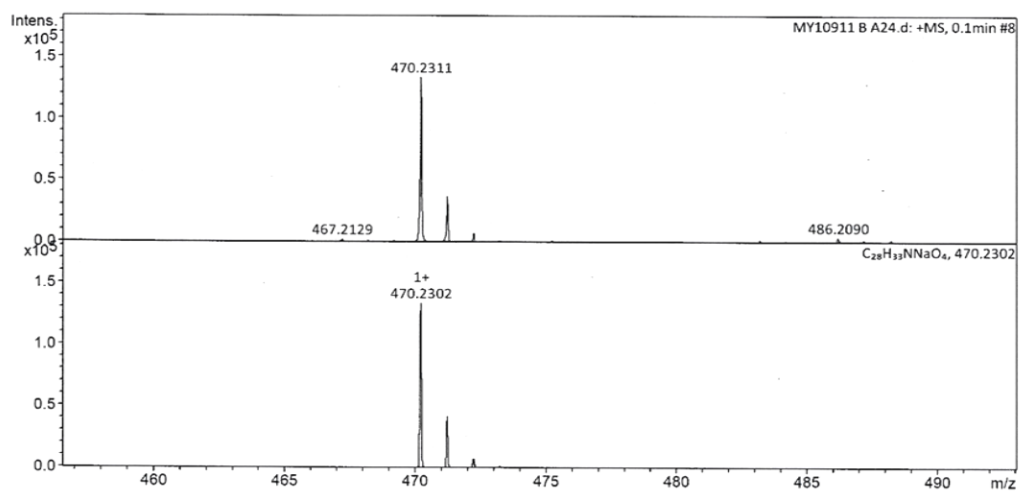

**Figure S114.** HRESIMS spectrum of compound **8**

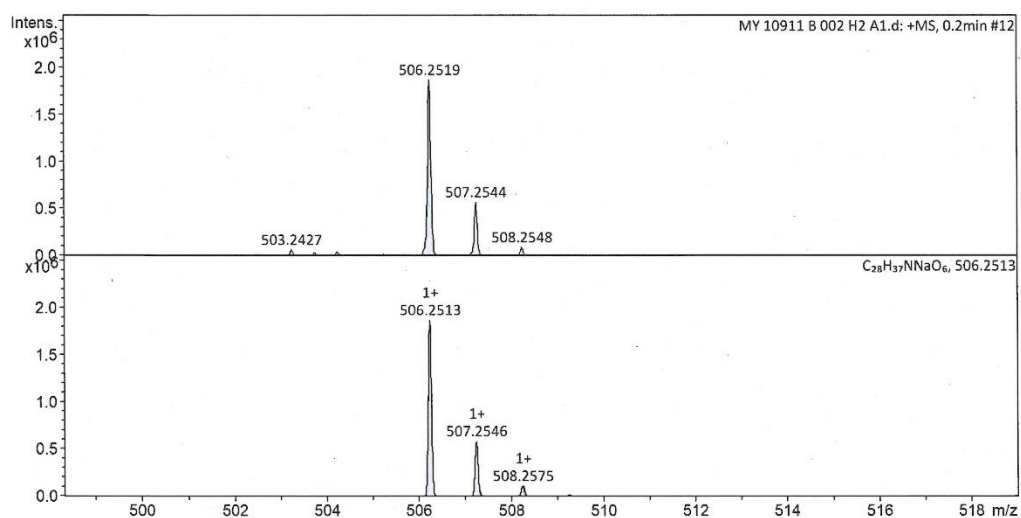

**Figure S115.** HRESIMS spectrum of compound **9**

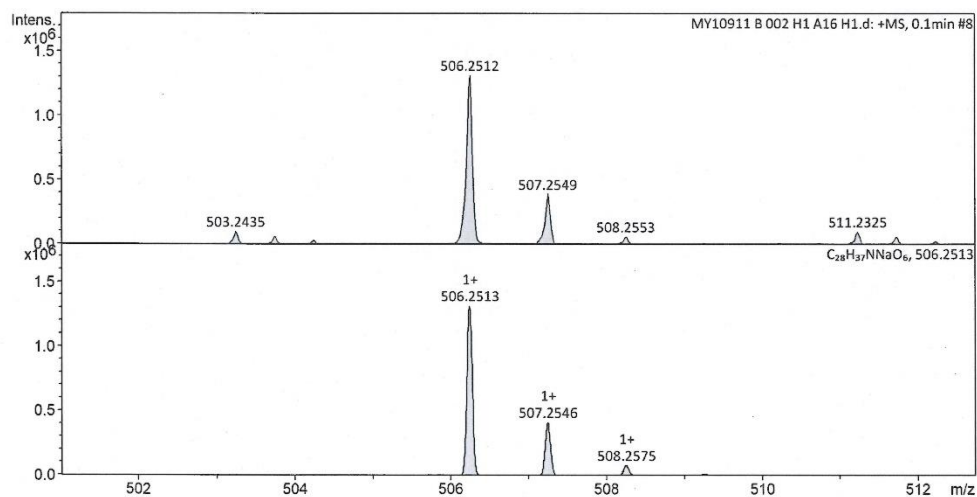

**Figure S116.** HRESIMS spectrum of compound **10**

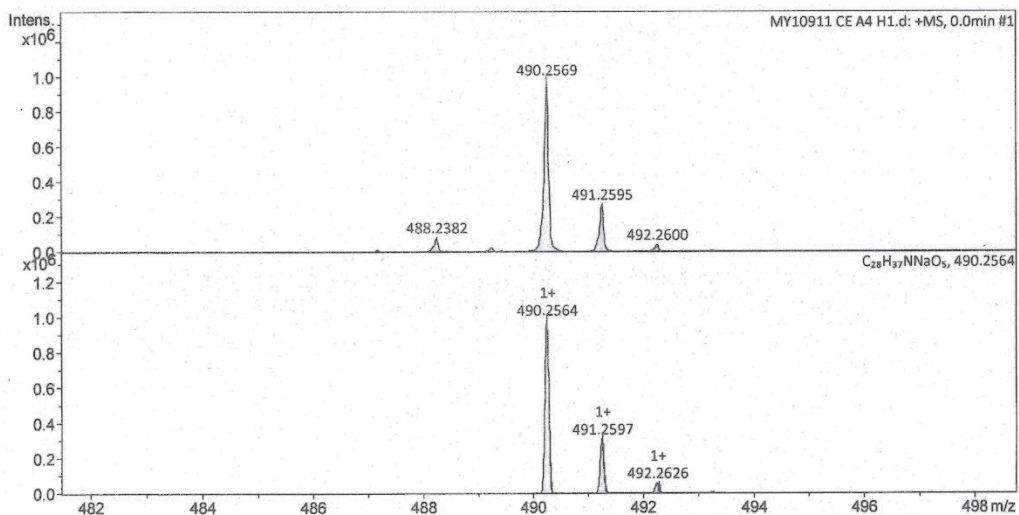

**Figure S117.** HRESIMS spectrum of compound **11**

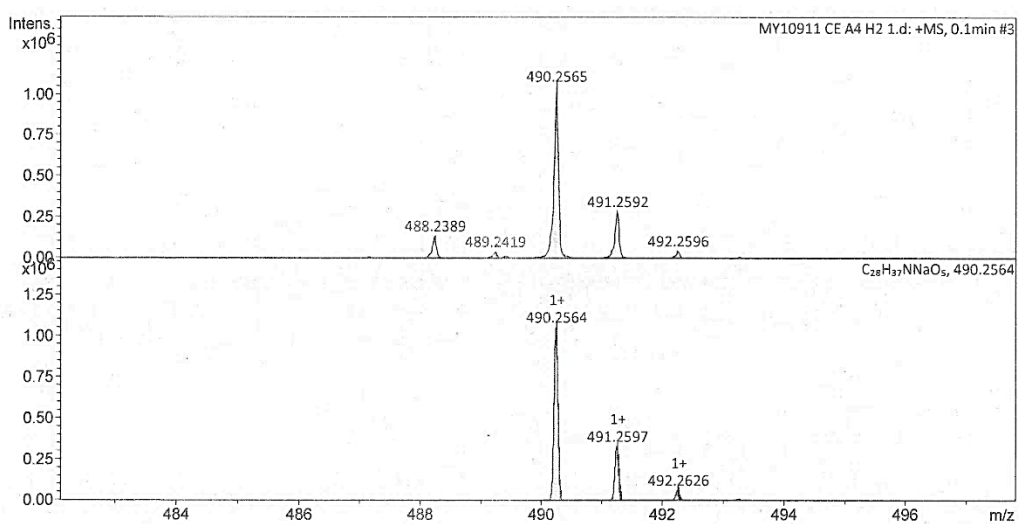

**Figure S118.** HRESIMS spectrum of compound **12**



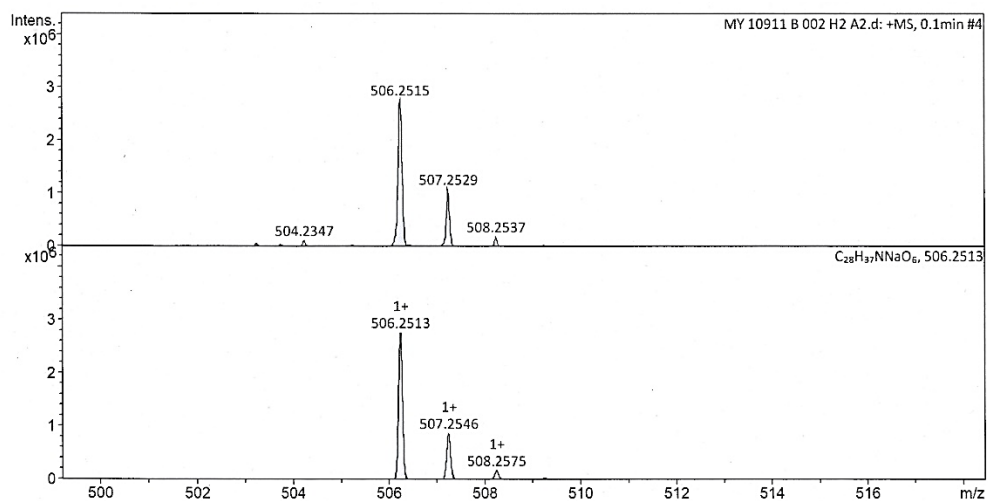

**Figure S119.** HRESIMS spectrum of compound **13**

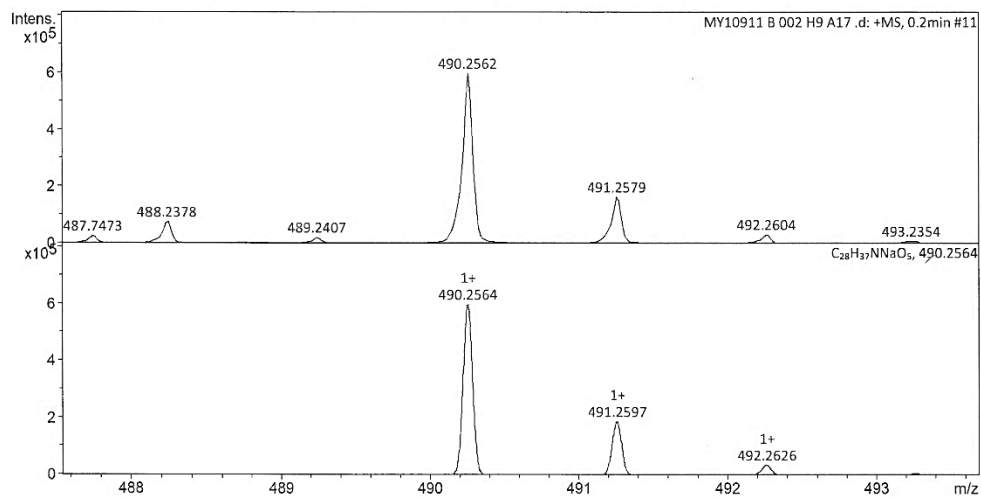

**Figure S120.** HRESIMS spectrum of compound **14**

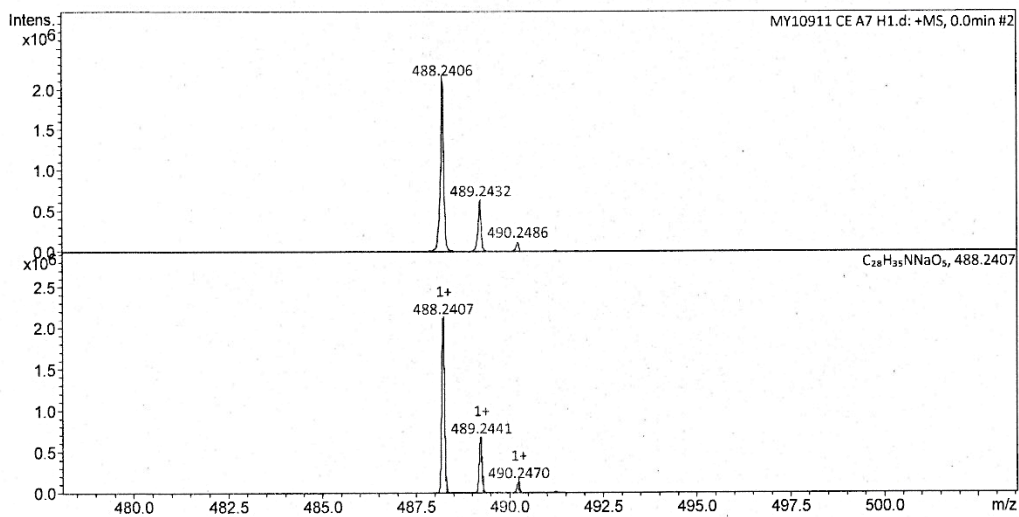

**Figure S121.** HRESIMS spectrum of compound **15**

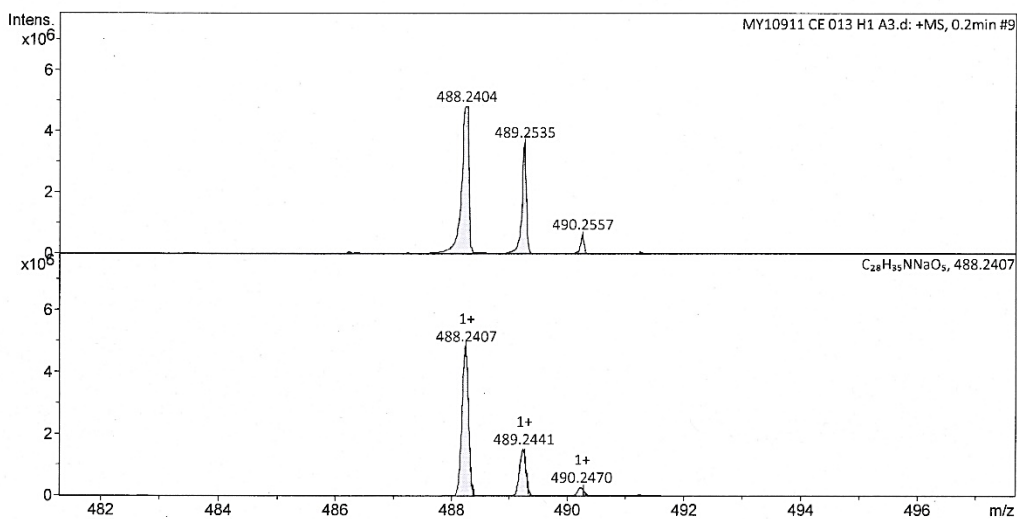

**Figure S122.** HRESIMS spectrum of compound **16**

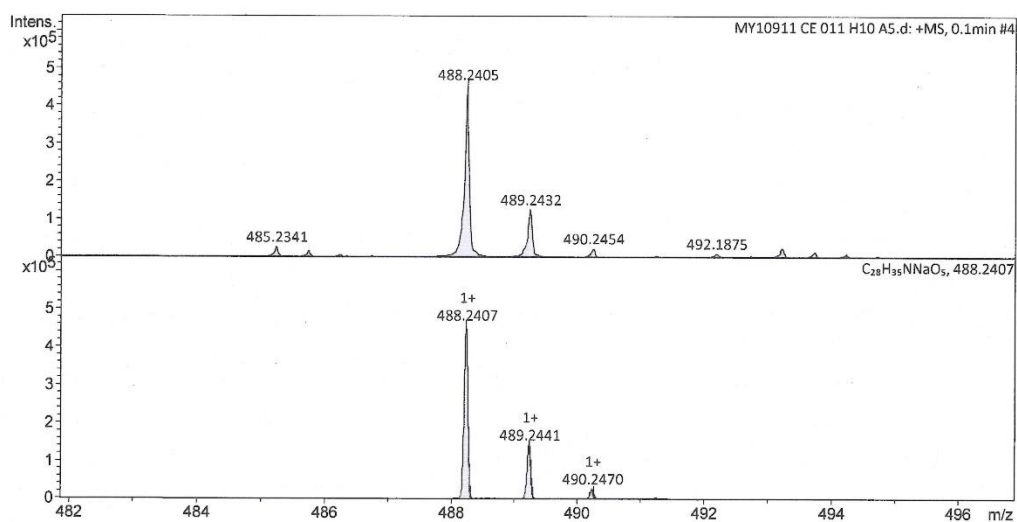

**Figure S123.** HRESIMS spectrum of compound **17**

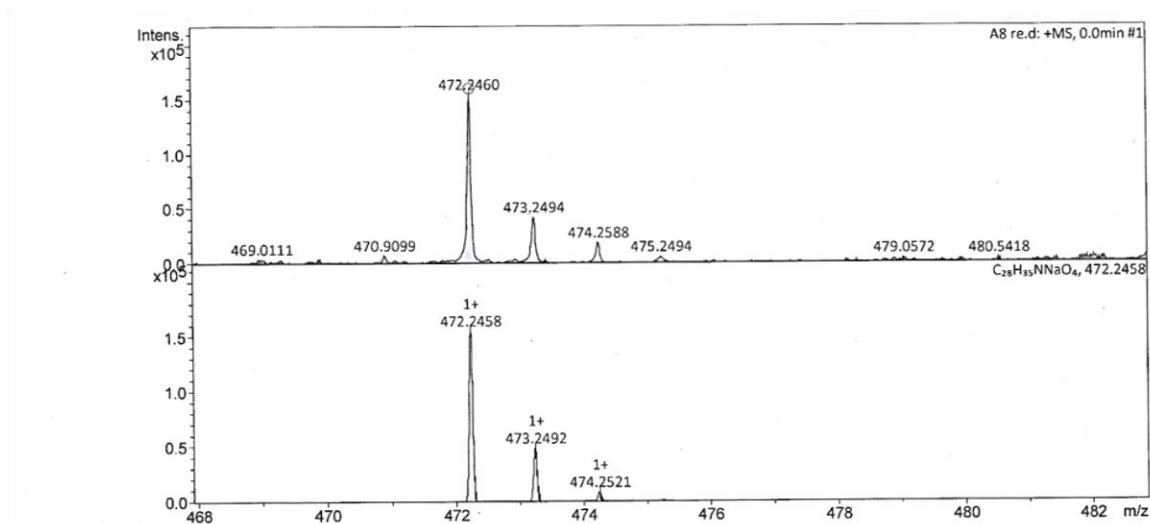

**Figure S124.** HRESIMS spectrum of compound **18**

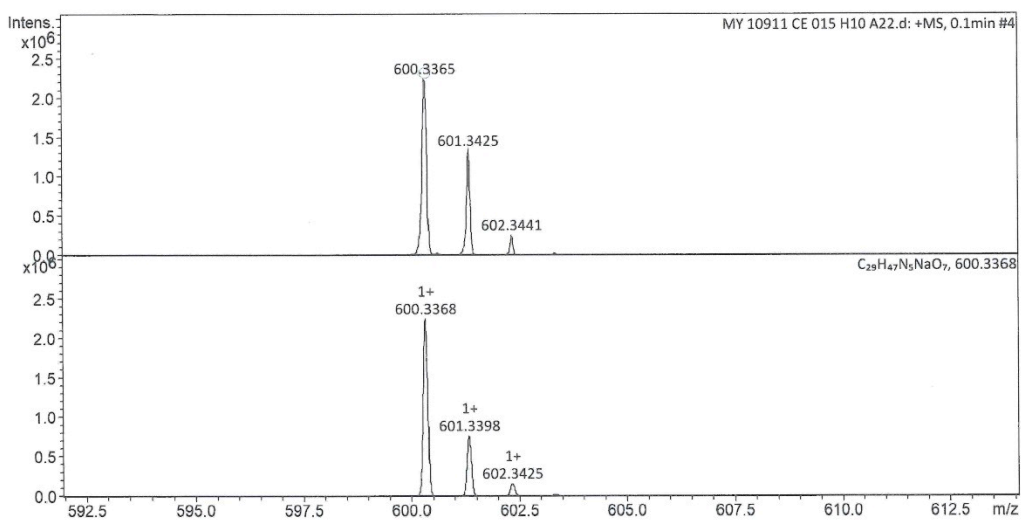

**Figure S125.** HRESIMS spectrum of destruxin A

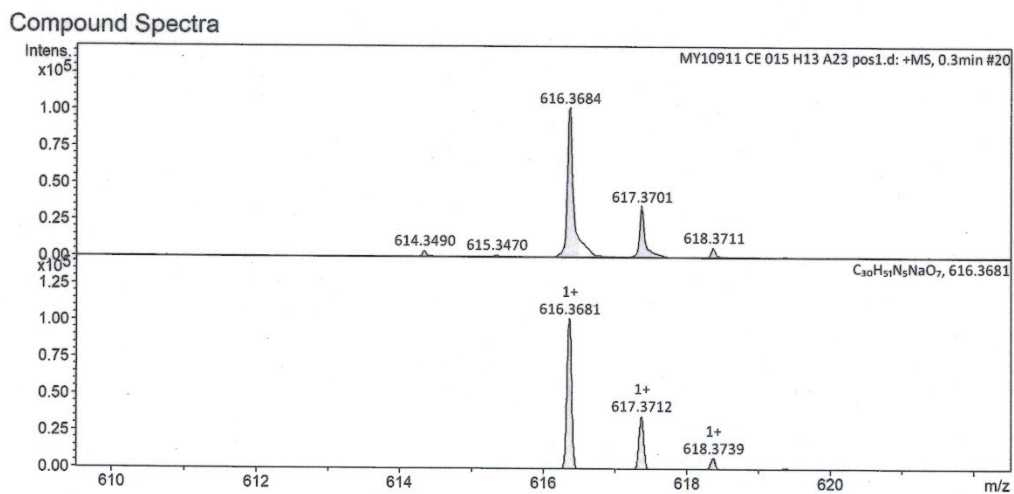

**Figure S126.** HRESIMS spectrum of destruxin B

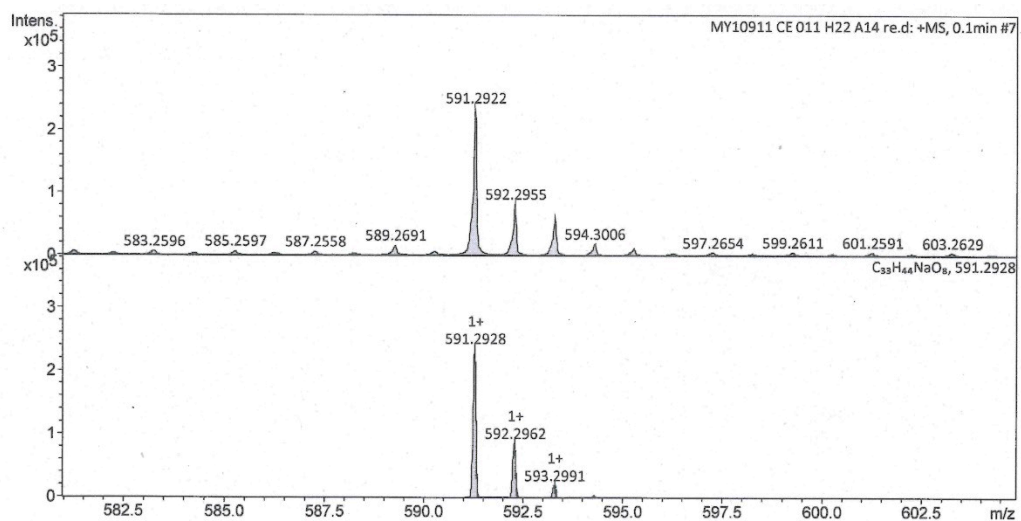

**Figure S127.** HRESIMS spectrum of helvolic acid

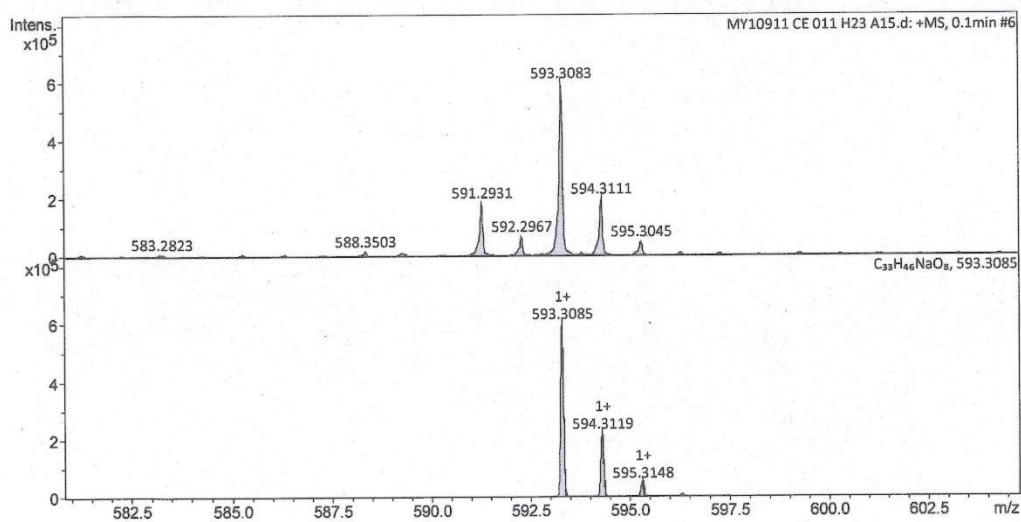

**Figure S128.** HRESIMS spectrum of 1,2-dihydrohelvolic acid

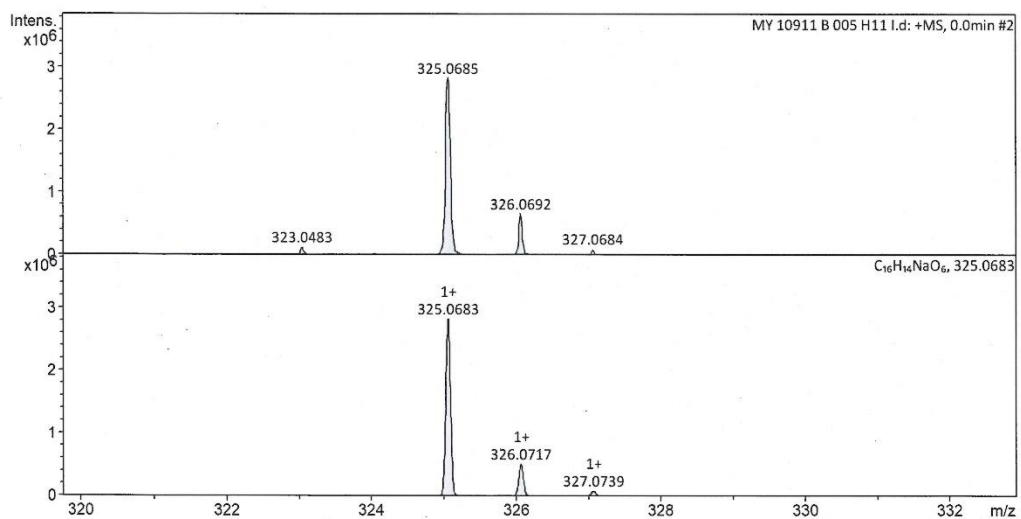

**Figure S129.** HRESIMS spectrum of meromuside I

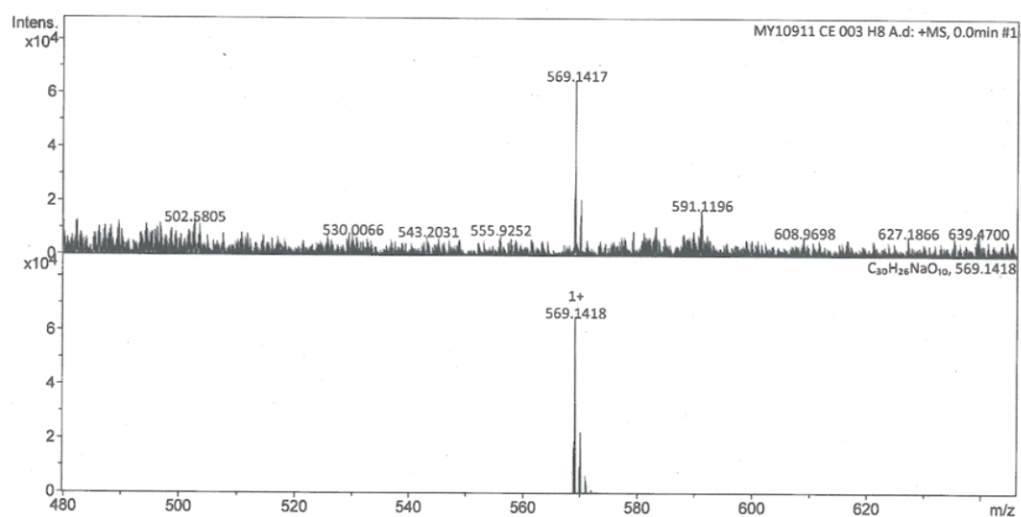

**Figure S130.** HRESIMS spectrum of ustilaginoidins D

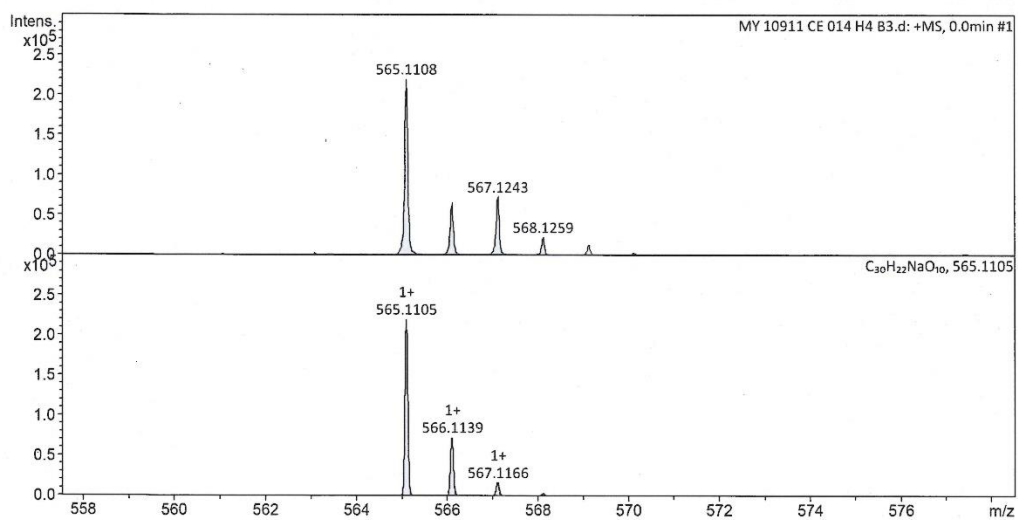

**Figure S131.** HRESIMS spectrum of ustilaginoidins K
